# Supplementary material for: Parent perceptions and decision making about treatments for epilepsy: a qualitative evidence synthesis
Source: PubMed Central journal article supplement — BMJ Open. 2023 Jan 31;13(1):e066872. doi: 10.1136/bmjopen-2022-066872 (PMC9890834; doi:10.1136/bmjopen-2022-066872), 2023-01-31
Supplement: bmjopen-2022-066872.draft_revisions.pdf [file bmjopen-2022-066872.draft_revisions.pdf]

# BMJ Open

BMJ Open is committed to open peer review. As part of this commitment we make the peer review history of every article we publish publicly available.

When an article is published we post the peer reviewers' comments and the authors' responses online. We also post the versions of the paper that were used during peer review. These are the versions that the peer review comments apply to.

The versions of the paper that follow are the versions that were submitted during the peer review process. They are not the versions of record or the final published versions. They should not be cited or distributed as the published version of this manuscript.

BMJ Open is an open access journal and the full, final, typeset and author-corrected version of record of the manuscript is available on our site with no access controls, subscription charges or pay-per-view fees (<http://bmjopen.bmj.com>).

If you have any questions on BMJ Open's open peer review process please email [info.bmjopen@bmj.com](mailto:info.bmjopen@bmj.com)

# BMJ Open

## Parent perceptions and decision-making about treatments for epilepsy: A qualitative evidence synthesis

|                               |                                                                                                                                                                                                                                                                                                                                                                     |
|-------------------------------|---------------------------------------------------------------------------------------------------------------------------------------------------------------------------------------------------------------------------------------------------------------------------------------------------------------------------------------------------------------------|
| Journal:                      | <i>BMJ Open</i>                                                                                                                                                                                                                                                                                                                                                     |
| Manuscript ID                 | bmjopen-2022-066872                                                                                                                                                                                                                                                                                                                                                 |
| Article Type:                 | Original research                                                                                                                                                                                                                                                                                                                                                   |
| Date Submitted by the Author: | 27-Jul-2022                                                                                                                                                                                                                                                                                                                                                         |
| Complete List of Authors:     | Uhl, Stacey; ECRI, Center for Clinical Evidence<br>Konnyu, Kristin; Brown University School of Public Health, Center for Evidence Synthesis<br>Wilson, Renee; Johns Hopkins University, School of Public Health<br>Adam, Gaelen; Brown University,<br>Robinson, Karen; Johns Hopkins University, School of Public Health<br>Viswanathan, Meera ; RTI International, |
| Keywords:                     | QUALITATIVE RESEARCH, Epilepsy < NEUROLOGY, NEUROSURGERY, Paediatric neurology < PAEDIATRICS                                                                                                                                                                                                                                                                        |
|                               |                                                                                                                                                                                                                                                                                                                                                                     |

SCHOLARONE™  
Manuscripts

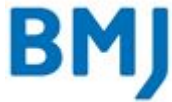

I, the Submitting Author has the right to grant and does grant on behalf of all authors of the Work (as defined in the below author licence), an exclusive licence and/or a non-exclusive licence for contributions from authors who are: i) UK Crown employees; ii) where BMJ has agreed a CC-BY licence shall apply, and/or iii) in accordance with the terms applicable for US Federal Government officers or employees acting as part of their official duties; on a worldwide, perpetual, irrevocable, royalty-free basis to BMJ Publishing Group Ltd ("BMJ") its licensees and where the relevant Journal is co-owned by BMJ to the co-owners of the Journal, to publish the Work in this journal and any other BMJ products and to exploit all rights, as set out in our [licence](#).

The Submitting Author accepts and understands that any supply made under these terms is made by BMJ to the Submitting Author unless you are acting as an employee on behalf of your employer or a postgraduate student of an affiliated institution which is paying any applicable article publishing charge ("APC") for Open Access articles. Where the Submitting Author wishes to make the Work available on an Open Access basis (and intends to pay the relevant APC), the terms of reuse of such Open Access shall be governed by a Creative Commons licence – details of these licences and which [Creative Commons](#) licence will apply to this Work are set out in our licence referred to above.

Other than as permitted in any relevant BMJ Author's Self Archiving Policies, I confirm this Work has not been accepted for publication elsewhere, is not being considered for publication elsewhere and does not duplicate material already published. I confirm all authors consent to publication of this Work and authorise the granting of this licence.

**TITLE:****Parent perceptions and decision-making about treatments for epilepsy: A qualitative evidence synthesis****AUTHORS**

Stacey Uhl, MS<sup>a</sup>; Kristin J. Konnyu, PhD<sup>b</sup>; Renee Wilson, MS<sup>c</sup>; Gaelen P. Adam<sup>b</sup>, MLIS MPH; Karen A. Robinson, PhD<sup>d</sup>; Meera Viswanathan, PhD<sup>e</sup>

Stacey Uhl and Kristin Konnyu contributed equally to the writing of this manuscript

Corresponding author: Stacey Uhl, suhl@ecri.org

Word count: 4159 (159 over)

<sup>a</sup> Center for Clinical Evidence and Guidelines  
ECRI  
Plymouth Meeting, PA, USA

<sup>b</sup> Center for Evidence Synthesis in Health  
Department of Health Services, Policy, and Practice  
Brown University School of Public Health  
Providence, Rhode Island, USA

<sup>c</sup> Department of Health Policy and Management  
School of Public Health  
Johns Hopkins University  
Baltimore, MD, USA

<sup>d</sup> Department of Medicine  
Johns Hopkins University School of Medicine  
Baltimore, MD. USA

<sup>e</sup> Evidence-based Practice Center  
RTI International–University of North Carolina at Chapel Hill  
Chapel Hill, NC, USA

## Abstract

**Objectives:** A qualitative evidence synthesis on parents' perspectives and experiences of treatments for childhood epilepsy.

**Methods:** Searched Embase, MEDLINE, PubMed, the Cochrane Library, CINAHL, PsycINFO, SocINDEX, and Web of Science from January 1, 1999, to August 19, 2021. We selected qualitative studies about caregiver's perspectives on anti-epileptic drugs, diet, or surgery treatments for childhood epilepsy. We used the Theoretical Domains Framework (TDF) to guide the extraction and synthesis of the qualitative findings as per a best-fit framework approach. One reviewer extracted study data and methodological characteristics, and two reviewers extracted qualitative findings. The team verified all extractions.

**Results:** We identified themes within TDF domains and synthesized summary statements of these themes. We assessed our confidence in our summary statements using GRADE-CERQual. We identified 5 studies (in 6 reports) of good methodological quality focused on caregiver perceptions of neurosurgery; we found limited indirect evidence on parents' perceptions of medications or diet. We identified themes within six of the 14 TDF domains relevant to treatment decisions: knowledge, emotion; social/professional role and identity; social influence; beliefs about consequences; and environmental context and resources.

**Conclusions:** Parents of children with epilepsy navigate a complex process to decide whether to have their child undergo surgery. This process involves gathering evidence, discussing it with peers and professionals, working through emotions and overcoming barriers in the healthcare system. Educational resources, peer support, and patient navigators may help support parents through this process. More qualitative studies are needed to fully understand the diversity of experiences of caregivers across various points in the decision-making pathway and among different healthcare contexts.

## Strengths and Limitations

- This synthesis followed contemporary standards for the conduct of qualitative synthesis, which includes using a best-fit framework approach to categorize and synthesize findings based on the Theoretical Domains Framework (TDF).
- Risks to rigor of included studies were assessed using the Critical Appraisal Skills Programme (CASP) tool for qualitative studies.
- Confidence in the conclusions drawn from this synthesis was rated using the GRADE CerQual.
- As with all qualitative synthesis, selecting which data to extract and how to code it is ultimately a subjective process.
- Limited to studies that examined parents' perceptions, experiences, and decision-making about pursuing surgery to treat their child's epilepsy.

**Word: 4,078**

Epilepsy is a common neurologic disorder in children, affecting about 1% of children in the United States.<sup>1</sup> While there are different types of childhood epilepsy, each type involves recurring seizures caused by abnormal electrical activity in the brain. Epilepsy is categorized by seizure type (e.g., focal, generalized, or unknown), epilepsy type (e.g., focal, generalized, unknown), and syndrome type (e.g., childhood absence epilepsy, Dravet syndrome).<sup>2, 3</sup> No matter the type, epilepsy is a chaotic and unpredictable condition for both the affected children and their caregivers.<sup>4</sup>

Treatment and ongoing management approaches typically depend on the type of the epilepsy and prior treatment response. Treatment options for childhood epilepsy include anti-epileptic drugs, ketogenic diets, or surgery. Although many children with new-onset epilepsy achieve seizure freedom with anti-epileptic drugs,<sup>5</sup> these drugs are associated with numerous adverse effects (e.g., tiredness, nausea, headache, difficulty concentrating, depression, and suicidal ideation).<sup>6</sup> Furthermore, about 20% of children continue to experience seizures despite drug treatment.<sup>7</sup> The effectiveness of ketogenic diets (e.g., Atkins diet) is supported by low quality evidence.<sup>8</sup> However, these diets are also associated with adverse effects (e.g., gastrointestinal symptoms, dyslipidemia, decreased growth, and kidney stones), and require considerable caregiver effort to maintain. Surgical interventions may isolate and remove the underlying neurological cause of seizures, but carry risks of bleeding, infection, hydrocephalus, new neurologic deficits, and death.

Epilepsy treatment decision-making is thus complex and needs to consider each child's unique form of epilepsy, evidence of each treatment's potential benefits and harms, previous or ongoing experiences with treatment(s), and family's values and preferences. Although studies of treatment effectiveness rarely explore how families navigate these complex considerations or how these considerations may evolve over time, qualitative studies can offer context on caregiver experiences and decision-making. Syntheses of these qualitative studies can help shape caregiver and healthcare provider interactions and inform shared decision-making tools and processes. The purpose of this review is to summarize the qualitative research regarding caregivers' perspectives and experiences of treatments for childhood epilepsy.

**Methods**

We conducted a qualitative evidence synthesis in accordance with standards for qualitative evidence syntheses.<sup>9-11</sup>

**Data Sources and Searches**

We searched Embase, MEDLINE (in process), PubMed, the Cochrane Library, CINAHL, PsycINFO, SocINDEX, and Web of Science for studies published from January 1, 1999, to August 19, 2021 using terms related to epilepsy, treatments, and caregiver (or parent) perspectives (Appendix A). The search was limited to English-language. We also ran forward and backward citation searches (i.e., snowball searching) on included studies to ensure relevant studies were not missed.

**Study Selection**

We included qualitative studies that sought to understand caregiver's perspectives on anti-epileptic drugs, diet, or surgical treatments for childhood epilepsy. Studies needed to use qualitative methods for both data collection (e.g., focus group, individual interviews, or open-ended survey questions) and data analysis (e.g., thematic analysis). We excluded studies that

1  
2  
3 focused only on non-caregiver perceptions (e.g., patient or healthcare provider) or that focused  
4 only on caregiver stress or caregiver expectations of treatment. We did not restrict by study  
5 country or care setting.

6 One reviewer screened titles and abstracts of citations retrieved from searches for eligibility.  
7 Two independent reviewers screened the full text of potentially relevant citations in PICO  
8 Portal<sup>®</sup> (<https://picoportal.org/>). Disagreements were resolved through discussion of the full  
9 team.  
10

### 11 **Data Extraction and Quality Assessment**

12 For each study, we extracted details on the study design and methodological features,  
13 population characteristics, and qualitative analysis findings.

14 One reviewer assessed risks to rigor using the Critical Appraisal Skills Programme (CASP)  
15 tool for qualitative studies, which appraises research aims, congruence between research aims  
16 and methodological approach, quality of sampling and data collection, appropriateness of  
17 application of methods, richness and conceptual depth of findings, appropriateness of  
18 interrogation of findings, and researcher reflexivity.<sup>12</sup> All team members reviewed the CASP  
19 assessments to ensure consistency of ratings across studies.  
20

21 Two team members independently extracted and coded the qualitative findings of the  
22 included studies in MaxQDA<sup>®</sup> 2020 (Berlin, Germany), an online platform designed to support  
23 qualitative data management, extraction, and analysis. The extracted data included direct quotes  
24 from the participants (first order statements) and summary statements written by the study  
25 authors (second order statements). Extracted data were imported into spreadsheets to facilitate  
26 data cleaning, confirmation of themes, and synthesis.  
27

28 To categorize the extracted data, we used the Theoretical Domains Framework (TDF),<sup>13, 14</sup>  
29 which was developed to assist in identifying the cognitive, affective, social, and environmental  
30 factors that may influence an individuals' performance of a health behavior. The health behavior  
31 of interest for this review was the decision to pursue an epileptic treatment. The 14 domains  
32 include: knowledge; skills; social/professional role and identity; belief about capabilities;  
33 optimism; beliefs about consequences; reinforcement; intention; goals; memory, attention, and  
34 decision processes; environmental context and resources; social influences; emotion and  
35 behavioral regulation (Appendix B). A third reviewer confirmed TDF domain codes and the  
36 team discussed the coding to ensure accuracy and consistency both within and across TDF  
37 domains. One reviewer did a final confirmation of extracted text and coding to ensure no data  
38 were missed and that there was consistency across domains.  
39

### 40 **Data synthesis and analysis**

41 We adopted a best-fit framework approach to guide our qualitative synthesis. In this  
42 approach, data are coded according to TDF domains. One reviewer then summarized key themes  
43 within each TDF domain. Themes were discussed and debated among the team until consensus  
44 was achieved. We used the finalized themes to develop summary statements and assessed our  
45 confidence in these statements using GRADE-CERQual.<sup>15-17</sup> We rated our confidence in the  
46 summary statements as either high, moderate, low, or very low based on our assessment of the  
47 four GRADE-CERQual domains: methodological limitations, relevance, coherence, and  
48 adequacy of the data (Appendix C for definition of domains). "High confidence" refers to a  
49 finding that is highly likely to be a reasonable representation of the phenomenon of interest,  
50 whereas "very low confidence" refers to a review finding in which it was unclear if the finding  
51 was a reasonable representation.  
52  
53  
54  
55  
56  
57



**Patient and public involvement:** Patients or the public were not involved in the design, or conduct, or reporting, or dissemination plans of our research.

## Results

The literature search yielded 1,447 citations from searches (see PRISMA flow diagram, Figure 1). We found 66 citations to retrieve for full-text screening of which five studies (in six publications) were included in the final sample.<sup>18-23</sup> Table 1 presents characteristics of included studies.

All studies examined parents' perceptions, experiences, and decision-making leading to surgery. All studies were conducted after the children had undergone surgery, with one study also surveying parents "just prior" to surgery.<sup>23</sup> Three studies reported data on parents' perceptions and experiences with medications and diet, but only in the context of selecting surgery (e.g., parents considering surgery due to the undesirable side effects or uncontrolled epilepsy with prior treatments).<sup>18, 20, 23</sup> In total, the views of 186 parents are represented in the five studies (the majority of whom were mothers, n=115). The time from children's surgery to data collection ranged from 6 months to 10 years among the three studies reporting on timing. Four studies collected parent perspectives through semi-structured interviews conducted in-person or over the telephone (length ranging from 10 to 75 minutes),<sup>18-22</sup> and one study captured parent perceptions through open-ended survey questions.<sup>23</sup>

All studies were assessed to have minor risk to rigor (Appendix D) due to the retrospective nature of recruitment and the lack of consideration (or reporting) of the relationship between researchers and participants. Otherwise, studies were considered appropriate in their use of qualitative design, methods of data collection, and analysis. The retrospective nature of the included studies raises concerns about recall bias, as surgical outcomes may have affected retrospective perceptions, and selection bias since studies only included parents of children who were: a) referred to surgery and b) proceeded with surgery (and possibly experienced some level of success with surgery though this was not reported explicitly). All but one study<sup>22</sup> did not report whether interviewers were part of the child's care team, which may have influenced responses. Ozanne et al. reported that the researchers that interviewed parents and analyzed the data were not part of the epilepsy surgery team.<sup>22</sup>

We identified and coded data for six of the 14 TDF domains: knowledge; emotion; social/professional role and identity; social influence; beliefs about consequences; and environmental context and resources (Figure 2). We did not find evidence from extracted qualitative data for the remaining eight TDF domains. Appendix E provides the extracted text from studies linked to their synthesized themes.

The GRADE-CERQual table (Table 2) summarizes findings and conclusions for each TDF domain. We had no or minor concerns with the coherence of the findings (i.e., the synthesized findings reflects the complexity and variation of the data) or their relevance (i.e., the extent to which synthesized findings are applicable to the context specified in the review question). We had minor or moderate concerns with the adequacy (i.e., the degree of richness and quantity of the data supporting the synthesized finding) of the findings related to knowledge and environmental context and resources, respectively. Below, we report the summary statement (and associated GRADE-CERQual level of confidence) under each identified TDF domain, and summarize the key themes that contributed to the statements.

### TDF Domain 1: Knowledge

1  
2  
3  
4 **Summary statement:** *Evidence from four studies indicated that caregivers value*  
5 *information about epilepsy, its treatment options, and navigating the healthcare system to access*  
6 *timely and effective treatment for their child. Despite feeling overwhelmed by the complexity and*  
7 *sometimes contradictory information, caregivers value learning this new language so they can*  
8 *become better advocates for their child (Moderate confidence)*<sup>18-22</sup>

9 Once parents recognized “something [was] wrong” with the health of their child, they sought  
10 information from multiple sources “to understand seizures and epilepsy and become better  
11 advocates for their child.”<sup>18</sup> Parents wanted information about medications,<sup>18</sup> surgery,<sup>18, 20</sup> and  
12 what types of doctors were needed to care for their child.<sup>19</sup> They also noted needing to learn  
13 about how to navigate the health system including multiple specialties, hospitals, and insurance  
14 procedures.<sup>18</sup>

15  
16 Parents often perceived the information they received from professionals as inadequate to  
17 make informed decisions.<sup>20</sup> They described seeking lay language information from multiple  
18 sources, including additional professionals, the internet, books, family, friends, and other  
19 parents.<sup>18, 22</sup> Parents expressed discomfort in the “lack of understandable information” and  
20 “information imbalance” between themselves and their child’s providers and sought to become  
21 “epilepsy experts in order to be effective advocates for their children.”<sup>19</sup> After increasing their  
22 knowledge, parents felt more empowered to ask questions and participate more actively in the  
23 decision-making.<sup>18, 20</sup> Parents thus described active learning to ensure productive information  
24 exchanges with providers (including using clinical terms) to support a positive shared-decision  
25 making process.<sup>19</sup>

## 26 **TDF Domain 2: Social role and identity**

27  
28 **Summary statement:** *Evidence from one study indicated that caregivers feel a sense of*  
29 *duty and need to do the right thing in selecting a treatment for their child (Moderate*  
30 *confidence).*<sup>20</sup>

31  
32 Parents reported a “sense of duty” to be “strong” and “brave.” They also reported feeling  
33 pressure to “do the right thing” by their child; that is, choosing the treatment option that would  
34 give their child the best chance of “reaching their full potential.”<sup>20</sup>

## 35 **TDF Domain 3: Emotion**

36  
37 **Summary statement:** *Five studies provided evidence to suggest that caregivers*  
38 *experience the journey of navigating their child’s epilepsy and ultimately selecting surgical*  
39 *treatment as an emotionally fraught one with emotions ranging from exhaustion, desperation,*  
40 *fear to relief, and hope (Moderate confidence).*<sup>18-22</sup>

41  
42 Parents expressed feeling drained and stressed from always being “on call,”<sup>18</sup> worrying  
43 about a seizure,<sup>18, 21</sup> or mood and behavioral difficulties.<sup>21</sup> Parents recalled feeling frustrated<sup>18, 19</sup>  
44 and desperate to “find a treatment option that would work.”<sup>19</sup> For example, one mother was  
45 frustrated that her child’s provider continued to perform medication trials to manage seizures and  
46 not discuss surgery as an option,<sup>18</sup> while another mother was desperate to get her son to another  
47 doctor but needed to wait for referrals because of insurance.

48  
49 When considering surgery as a potential treatment option, parents reported the decision  
50 process as “difficult,” “frightening,” and “stressful.”<sup>19, 20</sup> Parents feared surgery would lead to  
51 worse health outcomes for their child,<sup>20, 23</sup> change their child’s personality, or cause a loss of  
52 function (e.g., partial or complete loss in speech or movement).<sup>23</sup> Parents also feared the  
53 possibility of surgery making seizures worse (e.g., increased frequency, duration). Thus, making  
54 the decision to have surgery “in vain.”<sup>23</sup>

1  
2  
3 However, for many parents, the decision to pursue surgery brought relief and feelings of  
4 hope. Parents in one study expressed gratitude once they finally decided to pursue surgery as  
5 they felt it was “demanding to not know if surgery would be possible.”<sup>22</sup> Parents also reported  
6 feeling hope for improvements in their child’s health and wellbeing after they decided to choose  
7 surgery. Finally, after making the decision to pursue surgery (or learning it was a viable option),  
8 parents reported that they hoped for candidacy,<sup>18, 20</sup> and experienced relief when a date was set.  
9  
20

#### 11 **TDF Domain 4: Social Influence**

12 **Summary statement:** *Three studies provided evidence to suggest that surgery is a family*  
13 *decision that requires outside support from other caregivers “experiencing the same thing” and*  
14 *from a healthcare professional acting as “champions.” (Moderate confidence) <sup>19-21</sup>*

15 Parents reported the value of connecting with other parents who were on a similar  
16 treatment journey (e.g., had a child with epilepsy that was unresponsive to medication) and had  
17 experiences and expertise that they could draw on.<sup>19, 20</sup> Peer connections helped parents  
18 understand the surgical procedural from a “parental perspective” and provided “emotional  
19 support.”<sup>20</sup> Parents also reported the value of having a good team of epilepsy providers and a  
20 “champion” (e.g., doctor, nurse, or social worker) to advocate for them and help them navigate  
21 purposefully through their journey.<sup>19</sup> One mother described one such champion, a nurse  
22 coordinator, as a “life saver,” who helped in getting referrals and pushed her to seek better care  
23 for her child.<sup>19</sup> Another mother described her child’s pediatrician as her champion because “he  
24 encouraged me and gave me...confidence.”<sup>19</sup>

25 Parents described seeing treatment decision-making as a family choice and indicated the  
26 importance of involving partners, siblings, grandparents, and the child (where developmentally  
27 appropriate). Parents found engaging the whole family in the decision-making process to be  
28 generally helpful, as the experience of the child’s epilepsy and potential consequences of  
29 treatment impacted the whole family.<sup>20</sup> However, for some families, decision-making regarding  
30 surgery gave rise to conflicts. For example, one mother described herself as more agreeable to  
31 surgery than the child's father because, as the primary parent, she “witnessed” the true extent of  
32 their child's seizures.<sup>20</sup>

#### 33 **TDF Domain 5: Beliefs about Consequences**

34 **Summary statement:** *Five studies provided evidence to suggest that parents undergo a*  
35 *transformation from seeing surgery as a last resort to the only option for their child to have a*  
36 *chance at a better life. Surgery became a viable option as parents realized that their child’s*  
37 *current treatment was not working or it had unacceptable side effects, and some saw the side*  
38 *effects of surgery as less daunting than the disease. <sup>18-23</sup>*

39 Parents of children who went on to have surgery reported going through a transformation in  
40 thinking of surgery as a “last resort” to a “necessary and hopeful option.”<sup>18</sup> This transformation  
41 in thinking evolved as parents acquired greater understanding about their child’s illness and  
42 prognosis, experience in treating their child with other treatments, acquired knowledge about the  
43 potential risks and benefits of surgery, and processed the diverse emotions associated with  
44 surgery.<sup>18, 19</sup>

45 An important part of parents’ moving toward a decision about surgery was weighing  
46 what they perceived to be the benefits and harms of surgery.<sup>20, 23</sup> In terms of benefits, parents  
47 hoped surgery would lead to improved outcomes such as seizure reduction and the opportunity  
48 for a “normal life” without the side effects of medications.<sup>20, 23</sup> Some parents were skeptical  
49 about the efficacy of surgery due to their experiences with medications and the ketogenic diet.  
50  
51  
52  
53  
54  
55  
56  
57

1  
2  
3 According to parents, these treatments were associated with side effects, negatively affected their  
4 child's quality of life, and provided only minimal improvement in seizure control.<sup>20</sup> In terms of  
5 adverse effects, parents were concerned that surgery would lead to surgical complications or  
6 various post-surgical impairments, including a change in personality, loss of speech or motor  
7 function, and behavioral problems.<sup>23</sup> A small number of parents reported having no concerns  
8 before surgery.<sup>23</sup>  
9

10 Beyond rational consideration of the benefits and risks of surgery, parents often reported  
11 coming to the decision to select surgery only after exhausting all other treatment options.<sup>20-22</sup>  
12 Parents expressed feeling like "it was the only choice [they] could make"<sup>20</sup> and their "only  
13 option"<sup>20</sup> in improving their child's outcomes or preventing their condition from getting worse.  
14 Parents understood there were potential complications associated with surgery, but "preferred to  
15 take a risk [in proceeding with surgery] rather than live in constant fear"<sup>22</sup> or having a child that  
16 "was unconscious all the time."<sup>21</sup>  
17  
18

### 19 **TDF Domain 6: Environmental Context and Resources**

20 **Summary statement:** *Three studies provided evidence that parents face challenges in*  
21 *navigating the healthcare system and interacting with professionals to find the "right doctor" or*  
22 *care team for their child. Parents value having their concerns heard and being engaged in the*  
23 *decision-making process (Low confidence)<sup>18-20, 22</sup>*  
24

25 Parents from one study in the U.S.<sup>18, 19</sup> and another in Sweden.<sup>22</sup> reported experiencing  
26 significant barriers with navigating the healthcare system. In the U.S.,<sup>18, 19</sup> parents expressed  
27 frustration with the extensive time it took to find the right doctor after navigating various doctors  
28 from different specialties across multiple institutions. Prior to selecting surgery for their child,  
29 parents reported difficulties in finding the "right doctor" with knowledge to "effectively identify  
30 the problem, and then make a clear plan of action." Parents attributed these difficulties to the  
31 lack of pediatric neurologists in their local area, inconsistencies in treatment recommendations,  
32 and rigid adherence to center-specific treatment protocols.<sup>18, 19</sup> Once parents made a decision to  
33 pursue surgery, they reported battles with insurance companies to pay for surgery.<sup>18, 19</sup> Parents in  
34 the Sweden reported similar frustrations with "the bureaucracy" as they felt it took "a long time  
35 to get a correct diagnosis" and "adequate support." They "thought that it would be helpful if the  
36 authorities understood that parents only asked for help when they had reached their limit, and  
37 then, urgent help was necessary."<sup>22</sup>  
38

39 Parents listed several provider-specific interactions they found to be either enablers or  
40 barriers to their experience of identifying and selecting appropriate treatment for their child.  
41 With respect to enablers, parents valued when providers validated (and shared) their concerns,  
42 gave their time and fostered trust, and engaged parents in the treatment decision-making process.  
43 Barriers noted by parents included having their concerns doubted or ignored,<sup>18, 22</sup> receiving  
44 inadequate information or support (especially before the epilepsy was recognized to be drug-  
45 resistant),<sup>22</sup> and feeling excluded from discussions about their child's surgical candidacy.<sup>20</sup> One  
46 study reported that parents perceived physician variability in knowledge about epilepsy and their  
47 lack of understanding about the pre-surgical referral process and appropriateness of surgery as  
48 barriers.<sup>18</sup> Parents in one study reported how they felt more reassured when their child received  
49 care from a comprehensive team of professionals with diverse expertise.<sup>19</sup> Parents from one  
50 study suggested providers give an "earlier and softer introduction of surgery as a possible  
51 treatment option."<sup>20</sup>  
52  
53

54  
55 *[Box 1 goes here]*  
56  
57

## Discussion

Understanding parent perspectives and experiences about treatments for childhood epilepsy is important for helping ensure that parents are appropriately supported during their decision-making process. Our qualitative evidence synthesis of five studies, which had minimal risks to rigor, identified key findings across six domains: Knowledge, Emotions, Social/Professional Role and Identify, Social Influences, Beliefs about Consequences, Environmental Context and Resources. However, the evidence was limited to considerations regarding surgical treatment. Overall, these findings suggest that the decision to select surgery for childhood epilepsy involves parents going through a complex journey of acquiring extensive knowledge, working through intense emotions and perceived parental responsibilities, needing family and peer support, transforming beliefs about epilepsy and potential treatment options, and navigating various barriers and facilitators of the healthcare system.

The findings provide important evidence of domains amenable to action, which may support parents' decision-making process. For example, parents often feel that they do not have enough information to make decisions about surgery. Parents also reported experiencing intense psychological distress and exhaustion during their decision-making process and felt these emotions acutely through their role as parents responsible for making a potentially life-altering decision for their child. They also reported valuing connections with peers who were going through (or had gone through) the same experience. Healthcare systems may therefore consider providing parents with resource to connect with other parents. Further work is needed to address parents' perceived lack of shared-decision making with providers and healthcare system barriers.. Patient navigators may help as a first step to helping parent's navigate the healthcare system and gain access to additional information and resources.

The findings also identified gaps in the evidence base regarding parents' perceptions and decision-making processes. For instance, we did not identify evidence mapping to certain TDF domains that we expected to find evidence for, such as Goals. Studies included in this review were vague and inconsistent in reporting parent's goals or their desired outcomes of treatment. Some studies noted that parents wanted what 'was best' for their child or they would be happy with a reduction in seizure frequency. Survey data collected from parents considering surgery found the primary goal was seizure freedom (98%), followed closely by reduced medication (90%), and improved cognition (82%).<sup>24</sup> We also did not identify evidence for the domain of Memory, Attention, and Decision process. Thus, we could not determine if parents become more skilled and confident in their decision-making over time through experience and acquired knowledge.

Similarly, we only found limited evidence for the domain of Environmental context and Resources. Further evidence is needed to understand how culture and equity play a role in parents' perceptions about treatment and their capacity to access care for their child. For example, many parents' reported important barriers in knowledge, access to professionals to diagnose and treat their child, and challenges with accessing and paying for surgery. The extent to which these factors would be the same or increase among families from different socio-economic backgrounds and cultures with varying economic, educational, and social resources needs further exploration. One may hypothesize that parents' perceptions of treatments for epilepsy vary depending on cultural perspectives of the condition and availability and access to care.

### Strengths and limitations

1  
2  
3 This review followed contemporary standards for the conduct of qualitative synthesis, which  
4 includes the use of a best-fit framework approach, a theory-informed framework to guide our  
5 synthesis and extraction, and use of the CASP and GRADE CerQual tool to assess the rigor and  
6 confidence of our findings. The use of the TDF is a particular strength of this review as it lends  
7 itself to both actionable interventions (e.g., mapping intervention strategies to key domains  
8 identified) and future research (e.g., further examination of domains not identified in the  
9 evidence such as ‘memory, attention, and decision processes’). However, as with all qualitative  
10 research, selecting which data to extract and how to code it is ultimately a subjective process. We  
11 attempted to limit subjectivity within our group by coding in duplicate and having regular  
12 meetings to ensure consistency across and within domains.  
13  
14

15 One primary limitation of the evidence included in this review is that the data in all studies  
16 were collected retrospectively. Parents were asked for their perceptions *after* their child had  
17 undergone surgery. This may have resulted in selection bias, as studies recruited parents of  
18 children referred to and proceeded with surgery. Thus, findings may not be fully reflective of the  
19 wider population of parents who are making decisions regarding surgery. The perceptions of  
20 parents who declined surgery were not captured. The retrospective nature of the data collection  
21 may have also resulted in recall bias. The time from children’s surgery to data collection ranged  
22 from 6 months to 10 years. Parents may have forgotten important aspects of their journey to  
23 surgery or filled in gaps of memory due to experiences with the child’s outcome. As described  
24 by one study, parent responses were “memories processed through emotions and colored from  
25 further experiences, which were then developed into opinions and personal views.”<sup>22</sup>  
26  
27

## 28 **Conclusion**

29 Parents of children with epilepsy navigate a complex process to decide whether to have their  
30 child undergo surgery involving gathering evidence, discussing it with peers and providers,  
31 working through emotions and overcoming barriers in the healthcare system. Educational  
32 resources, peer support, and patient navigators may help support parents through this process.  
33 More qualitative studies are needed to fully understand the diversity of experiences of parents  
34 across various points in the decision-making pathway and among different healthcare contexts.  
35 In particular, qualitative studies are needed that address parents’ perceptions and experiences  
36 with selecting alternative epilepsy treatment options such as diet and medications.  
37  
38  
39  
40  
41  
42  
43  
44  
45  
46  
47  
48  
49  
50  
51  
52  
53  
54  
55  
56  
57

## References

1. Russ SA, Larson K, Halfon N. A national profile of childhood epilepsy and seizure disorder *Pediatrics*. 2012 Feb;129:256-264.
2. Sarmast ST, Abdullahi AM, Jahan N. Current Classification of Seizures and Epilepsies: Scope, Limitations and Recommendations for Future Action Cureus. 2020 Sep 20;12:e10549.
3. Symonds JD, Elliott KS, Shetty J, Armstrong M, Brunklaus A, Cutcutache I, et al. Early childhood epilepsies: epidemiology, classification, aetiology, and socio-economic determinants *Brain*. 2021;144:2879-2891.
4. Rodenburg R, Meijer AM, Deković M, Aldenkamp AP. Family factors and psychopathology in children with epilepsy: a literature review *Epilepsy Behav*. 2005 Jun;6:488-503.
5. Rosati A, De Masi S, Guerrini R. Antiepileptic Drug Treatment in Children with Epilepsy *CNS Drugs*. 2015;29:847-863.
6. Mutanana N, Tsvere M, Chiweshe MK. General side effects and challenges associated with anti-epilepsy medication: A review of related literature *Afr J Prim Health Care Fam Med*. 2020 Jun 30;12:e1-e5.
7. Wirrell EC. Predicting pharmacoresistance in pediatric epilepsy *Epilepsia*. 2013 May;54 Suppl 2:19-22.
8. Martin-McGill KJ, Jackson CF, Bresnahan R, Levy RG, Cooper PN. Ketogenic diets for drug-resistant epilepsy *Cochrane Database Syst Rev*. 2018 Nov 7;11:Cd001903.
9. Noyes J BA, Cargo M, Flemming K, Harden A, Harris J, Garside R, Hannes K, Pantoja T, Thomas J. Chapter 21: Qualitative evidence. In: Higgins JPT TJ, Chandler J, Cumpston M, Li T, Page MJ, Welch VA, editor. *Cochrane Handbook for Systematic Reviews of Interventions version 63*: Cochrane; 2019 (updated February 2022).
10. Porritt K, Gomersall J, Lockwood C. JBI's systematic reviews: study selection and critical appraisal *AJN The American Journal of Nursing*. 2014;114:47-52.
11. Wong G, Greenhalgh T, Westhorp G, Buckingham J, Pawson R. RAMESES publication standards: meta-narrative reviews *BMC Medicine*. 2013 2013/01/29;11:20.
12. Programme CAS. CASP Qualitative Studies Checklist. 2022.
13. Michie S, Johnston M, Abraham C, Lawton R, Parker D, Walker A. Making psychological theory useful for implementing evidence based practice: a consensus approach *Qual Saf Health Care*. 2005 Feb;14:26-33.
14. Cane J, O'Connor D, Michie S. Validation of the theoretical domains framework for use in behaviour change and implementation research *Implement Sci*. 2012 Apr 24;7:37.
15. Glenton C, Carlsen B, Lewin S, Munthe-Kaas H, Colvin CJ, Tunçalp Ö, et al. Applying GRADE-CERQual to qualitative evidence synthesis findings-paper 5: how to assess adequacy of data *Implement Sci*. 2018 Jan 25;13:14.
16. Colvin CJ, Garside R, Wainwright M, Munthe-Kaas H, Glenton C, Bohren MA, et al. Applying GRADE-CERQual to qualitative evidence synthesis findings-paper 4: how to assess coherence *Implement Sci*. 2018 Jan 25;13:13.
17. Lewin S, Bohren M, Rashidian A, Munthe-Kaas H, Glenton C, Colvin CJ, et al. Applying GRADE-CERQual to qualitative evidence synthesis findings-paper 2: how to make an overall CERQual assessment of confidence and create a Summary of Qualitative Findings table *Implement Sci*. 2018 Jan 25;13:10.
18. Baca CB, Pieters HC, Iwaki TJ, Mathern GW, Vickrey BG. "A journey around the world": Parent narratives of the journey to pediatric resective epilepsy surgery and beyond *Epilepsia*. 2015 Jun;56:822-832.

19. Pieters HC, Iwaki T, Vickrey BG, Mathern GW, Baca CB. "It was five years of hell": Parental experiences of navigating and processing the slow and arduous time to pediatric resective epilepsy surgery *Epilepsy Behav.* 2016 Sep;62:276-284.
20. Heath G, Abdin S, Begum R, Kearney S. Putting children forward for epilepsy surgery: A qualitative study of UK parents' and health professionals' decision-making experiences *Epilepsy Behav.* 2016 Aug;61:185-191.
21. O'Brien J, Gray V, Woolfall K. Child and parent experiences of childhood epilepsy surgery and adjustment to life following surgery: A qualitative study *Seizure.* 2020 Dec;83:83-88.
22. Ozanne A, Verdinelli C, Olsson I, U HG, Malmgren K. Parental experiences before and long-term after their children's hemispherotomy - A population-based qualitative study *Epilepsy Behav.* 2016 Jul;60:11-16.
23. Sylvén I, Olsson I, Hallböök T, Rydenhag B, Reilly C. 'In the best case seizure-free' - Parental hopes and worries before and satisfaction after their child's epilepsy surgery *Epilepsy Behav.* 2020 Sep;110:107153.
24. Bach Q, Thomale UW, Müller S. Parents' and children's decision-making and experiences in pediatric epilepsy surgery *Epilepsy Behav.* 2020 Jun;107:107078.



## Footnotes

**Contributors:** SU served as project lead to coordinate and participate as a team member in identifying studies for inclusion, extracting and coding data, synthesizing findings, developing and grading summary statements, and drafting of initial report and manuscript; KK participated as team member in all aspects of data extraction, coding, synthesis, developing and grading summary statements, validating all findings, and revising initial drafts of manuscript; RW participated in all aspects of data extraction, coding, synthesis, developing summary statements, and reviewing manuscript; GA coordinated and revised search strategies and participated in all aspects of data extraction, coding, synthesis, and review of manuscript; KR participated in all aspects of data extraction, coding, synthesis, developing summary statements, and reviewing manuscript; MV participated in all aspects of data extraction, coding, synthesis, developing summary statements, and reviewing manuscript.

**Acknowledgements:** We would like to give a special thank you to Jane Noyes, MSc, DPhil for her mentorship, review, and support in the completion of this manuscript. We would also like to acknowledge Laura Koepfler, MLS of ECRI for her contribution in designing and running the literature searches.

**Funding:** This work was funded by the Agency for Healthcare Research and Quality through the following contracts: RTI-University of North Carolina EPC (290-2015-00011-I), Brown University EPC (290-2015-00002-I), ECRI Institute-Penn Medicine EPC (290-2015-00005-I), Johns Hopkins University EPC (290-2015-00006-I). No award or grant number.

**Disclaimer:** The findings and conclusions in this document are those of the authors, who are responsible for its contents; the findings and conclusions do not necessarily represent the views of AHRQ. Therefore, no statement in this report should be construed as an official position of AHRQ or of the U.S. Department of Health and Human Services.

**Competing Interests:** None of the authors listed in this manuscript have competing interests

**Patient consent:** Not required.

**Ethics approval:** This study does not involve human or animal participants

**Data sharing statement:** No additional data available.

**Box 1. Example excerpts for TDF domains****Box 1. Example excerpts for TDF domains****Knowledge**

- [Parent]: “I googled it until I couldn’t google anymore, and I think that gave me a better understanding of what was going on.”<sup>20</sup>.
- A mother who stated, “I just think knowledge is power and it also brings some comfort to making a good decision,” exemplified the sense of empowerment associated with gaining fluency in the language of epilepsy<sup>18</sup>

**Social/Professional Role and Identity**

- Parents discussed feeling pressure from a need to “do the right thing” by their child; that is, choosing the treatment option that would give their child the best chance of reaching their full potential.<sup>20</sup>

**Emotion**

- Participant descriptions highlighted the significant impact that epilepsy had upon on the child’s and family’s lives prior to epilepsy surgery. Worries about seizures and the associated risks led to constant fatigue for some: “you’re tired yourself before you even go out the door”<sup>21</sup>
- [Parent]: “At first I was horrified at the thought of this innocent – having her brain opened and operated on. It just seemed so barbaric”<sup>19</sup>

**Social Influences**

- Most participants described finding it difficult to talk to others about epilepsy, with several reporting that they limited the information they shared, or withholding the diagnosis altogether. “Gosh, we didn’t tell anybody. We were ashamed.”<sup>21</sup>
- [E]xchanging shared experiences with peers gave direction to decision-making because it helped with processing complex factual and emotional information”<sup>19</sup>.

**Beliefs about Consequences**

- This transformation occurred as parents became increasingly aware of the severity of their child’s epilepsy and its impact on their child’s and their future life. Although surgery remained scary, epilepsy was or became scarier than surgery. As some parents feared that their child would die from epilepsy, surgery was no longer perceived as an elective treatment<sup>18</sup>
- They wanted that their child could do everything their friends could do like “play football, cycle, and swim independently”. Some parents mentioned that they wanted their child to be able to go back to school and have a “proper social life” while some parents referenced the

1  
2  
3  
4  
5  
6  
7  
8  
9  
10  
11  
12  
13  
14  
15  
16  
17  
18  
19  
20  
21  
22  
23  
24  
25  
26  
27  
28  
29  
30  
31  
32  
33  
34  
35  
36  
37  
38  
39  
40  
41  
42  
43  
44  
45  
46  
47

future hoping that the child would be better placed to get a job and driving license as a result of surgery<sup>23</sup>

- Parents felt that epilepsy surgery was a question of life or death, of chaos or control. It was terrifying to see the child so ill. The epilepsy was uncontrolled, and drugs gave side effects. Parents felt that there was no alternative to surgery. However, it was a difficult decision since they did not know the outcome.<sup>22</sup>

#### **Environmental Context and Resources**

- Trust and safety characterized the relations to the pediatric neurologists and specialist nurses. It strengthened parents' trust to see that the pediatric neurologist fought for the child and that the parents' opinions counted in the decision process. Parents appreciated continuous contact.<sup>22</sup>
- Looking back, one father voiced happiness that he listened to his parental instincts rather than the opinion of one doctor. He (doctor) said, “I don't believe that she is a surgical candidate.’ As a parent, I listened and I wanted to think otherwise.... In hindsight, I'm glad I didn't listen to him.”<sup>18</sup>

**Table 1. Characteristics of included studies**

| Study, year, country                         | Population                                                                                                                                      | Number of parents                                                            | Time from surgery to data Collection | Study aim                                                                                                                                                                                                                                                                                                                                                                                                                                                                                | Data collection methods                                                           | Data analysis methods |
|----------------------------------------------|-------------------------------------------------------------------------------------------------------------------------------------------------|------------------------------------------------------------------------------|--------------------------------------|------------------------------------------------------------------------------------------------------------------------------------------------------------------------------------------------------------------------------------------------------------------------------------------------------------------------------------------------------------------------------------------------------------------------------------------------------------------------------------------|-----------------------------------------------------------------------------------|-----------------------|
| Baca <sup>1</sup> , 2015; Pieters, 2016, USA | Parents of children who had previously undergone resective epilepsy surgery                                                                     | 37 (individual parents)<br>31 mothers; 6 other                               | NR                                   | Baca, 2015: To identify the nature and range of parent-perceived barriers to timely receipt of pediatric epilepsy surgery.<br>Pieters, 2016: A) To describe thoroughly the parental experiences and perceptions of this slow and arduous period prior to the presurgical referral and evaluation to a comprehensive pediatric epilepsy center. B) To delineate the range of parent identified factors, or facilitators, that helped move families forward along their journey to surgery | Semi-structured interviews lasting on average 29 minutes (range 10 to 60 mins)    | Thematic analysis     |
| Heath, 2016, UK                              | Parents of children who had undergone pediatric epilepsy surgery<br>Also interviewed healthcare professionals caring for children with epilepsy | 9 (individual parents)<br>8 mothers; 1 father<br>10 healthcare professionals | NR                                   | To explore how parents and health professionals make decisions regarding pediatric epilepsy surgery to identify:<br>A) factors that influence the process of decision-making regarding pediatric epilepsy surgery from the perspective of parents and professionals and B) the support needs of those considering surgery as a treatment option for a child with medically intractable epilepsy                                                                                          | Semi-structured interviews lasting about 1 hour, and non-participant observations | Thematic analysis     |
| O'Brien, 2020, UK                            | Parents and their children who had gone through resective epilepsy surgery                                                                      | 9 parents (1 couple; 7 individual parents)<br>8 mothers; 1 father            | 6 months to 3 years                  | To explore children's and parents' perspectives on the journey prior to and following surgical treatment, with a focus on the emotional experiences of children and their parents throughout the surgery journey                                                                                                                                                                                                                                                                         | Semi-structured interviews lasting 25 to 75 mins                                  | Thematic analysis     |
| Ozanne, 2016, Sweden                         | Parents of children who had previously undergone resective epilepsy surgery                                                                     | 24 parents<br>13 mothers; 11 fathers                                         | 5 to 10 years                        | To explore parental experiences before and after hemispherotomy as reported at a long-term follow-up and the parents' views on received information and support                                                                                                                                                                                                                                                                                                                          | Interviews (length of time not reported)                                          | Content analysis      |
| Syven, 2020, Sweden                          | Parents of children who were undergoing resective epilepsy surgery (and 2 years post-surgery)                                                   | 107 (parental responses to both surveys)                                     | 2 years                              | A) To understand parental hopes and worries before their child underwent epilepsy surgery and B) To understand parental satisfaction two years after their child had undergone epilepsy surgery                                                                                                                                                                                                                                                                                          | Surveys (open-ended questions)                                                    | Thematic analysis     |

<sup>1</sup> Baca & Pieters included the same patient population but reported on different aspects of parent perspectives.

1  
2  
3  
4  
5  
6  
7  
8  
9  
10  
11  
12  
13  
14  
15  
16  
17  
18  
19  
20  
21  
22  
23  
24  
25  
26  
27  
28  
29  
30  
31  
32  
33  
34  
35  
36  
37  
38  
39  
40  
41  
42  
43  
44  
45  
46  
47

**Table 2. GRADE-CERQual summary of findings statements and ratings**

| Summary of Review Findings                                                                                                                                                                                                                                                                                                                                                         | Studies contributing                                 | Methodological limitations (CASP ratings)                                                                                                      | Coherence                                                                                      | Adequacy <sup>2</sup>                                                                                                                                                                                                                                                                      | Relevance                               | CERQual assessment                | Explanation of CERQual assessment                                                                                   |
|------------------------------------------------------------------------------------------------------------------------------------------------------------------------------------------------------------------------------------------------------------------------------------------------------------------------------------------------------------------------------------|------------------------------------------------------|------------------------------------------------------------------------------------------------------------------------------------------------|------------------------------------------------------------------------------------------------|--------------------------------------------------------------------------------------------------------------------------------------------------------------------------------------------------------------------------------------------------------------------------------------------|-----------------------------------------|-----------------------------------|---------------------------------------------------------------------------------------------------------------------|
| <p><u>Knowledge</u>: Caregivers value information about epilepsy, its treatment options, and navigating the healthcare system to access timely and effective treatment for their child. Despite feeling overwhelmed by the complexity and sometimes contradictory information, caregivers value learning this new language so they can become better advocates for their child</p> | Baca/Pieters<br>Heath<br>O'Brien<br>Ozanne           | <p><i>Minor concerns</i>: Nature of relationship between researchers and participants not reported; retrospective recruitment.<sup>1</sup></p> | <p><i>No or very minor concerns</i>: Findings reflect the complexity and variation of data</p> | <p><i>Minor concerns</i>: Included studies limited to surgery as treatment decision. We did not identify studies meeting inclusion criteria that addressed other treatments, such as diet or medications. Each study addressed knowledge acquisition and reported on it in some depth.</p> | <p><i>No or very minor concerns</i></p> | <p><i>Moderate confidence</i></p> | <p>Four studies with similar findings; minor concerns related to methods and limited treatment scope (surgery).</p> |
| <p><u>Social/professional role and identity</u>, parents feel a sense of duty and need to do the right thing in selecting a treatment for their child.</p>                                                                                                                                                                                                                         | Heath                                                | <p><i>Minor concerns</i>: Nature of relationship between researchers and participants not reported; retrospective recruitment.<sup>1</sup></p> | <p><i>No or very minor concerns</i>: Findings reflect the complexity and variation of data</p> | <p><i>Minor concern</i>: Included studies limited to surgery as treatment decision.</p>                                                                                                                                                                                                    | <p><i>No or very minor concerns</i></p> | <p><i>Moderate confidence</i></p> | <p>One study; minor concerns related to methods and limited treatment scope (surgery).</p>                          |
| <p><u>Emotion</u>, parents experience the journey of navigating their child's epilepsy and ultimately selecting surgical treatment as an emotionally fraught one with emotions ranging from exhaustion, desperation and fear to relief and hope.</p>                                                                                                                               | Baca/Pieters<br>Heath<br>O'Brien<br>Ozanne<br>Sylvén | <p><i>Minor concerns</i>: Nature of relationship between researchers and participants not reported; retrospective recruitment.<sup>1</sup></p> | <p><i>No or very minor concerns</i>: Findings reflect the complexity and variation of data</p> | <p><i>No or very minor concerns</i>: All 4 studies contributed to the rich depth of the varied emotions from fear of the illness to fear of the surgery to the mental toll that took on families and hope</p>                                                                              | <p><i>No or very minor concerns</i></p> | <p><i>Moderate confidence</i></p> | <p>Five studies with similar findings; minor concerns related to methods and limited treatment scope (surgery).</p> |

| Summary of Review Findings                                                                                                                                                                                                                                                                                                                                                                                  | Studies contributing                                 | Methodological limitations (CASP ratings)                                                                                                   | Coherence                                                                                  | Adequacy <sup>2</sup>                                                                                                                                                                               | Relevance                        | CERQual assessment         | Explanation of CERQual assessment                                                                                                                               |
|-------------------------------------------------------------------------------------------------------------------------------------------------------------------------------------------------------------------------------------------------------------------------------------------------------------------------------------------------------------------------------------------------------------|------------------------------------------------------|---------------------------------------------------------------------------------------------------------------------------------------------|--------------------------------------------------------------------------------------------|-----------------------------------------------------------------------------------------------------------------------------------------------------------------------------------------------------|----------------------------------|----------------------------|-----------------------------------------------------------------------------------------------------------------------------------------------------------------|
|                                                                                                                                                                                                                                                                                                                                                                                                             |                                                      |                                                                                                                                             |                                                                                            | and relief that surgery may offer                                                                                                                                                                   |                                  |                            |                                                                                                                                                                 |
| <u>Social influences</u> , surgery is a family decision that requires outside support from other parents “experiencing the same thing” and from a healthcare professional acting as “champions.”                                                                                                                                                                                                            | Pieters<br>Heath<br>O'Brien                          | <i>Minor concerns:</i><br>Nature of relationship between researchers and participants not reported; retrospective recruitment. <sup>1</sup> | <i>No or very minor concerns:</i><br>Findings reflect the complexity and variation of data | <i>No or very minor concerns</i>                                                                                                                                                                    | <i>No or very minor concerns</i> | <i>Moderate confidence</i> | Three studies with similar findings; minor concerns related to methods and limited treatment scope (surgery).                                                   |
| <u>Beliefs about consequences</u> , caregivers undergo a transformation from seeing surgery as a last resort to the only option for their child to have a chance at a better life. Surgery became a viable option as parents realized that their child's current treatment was not working or it had unacceptable side effects, and some saw the side effects of surgery as less daunting than the disease. | Baca/Pieters<br>Heath<br>O'Brien<br>Ozanne<br>Sylvén | <i>Minor concerns:</i><br>Nature of relationship between researchers and participants not reported; retrospective recruitment. <sup>1</sup> | <i>No or very minor concerns:</i><br>Findings reflect the complexity and variation of data | <i>No or very minor concerns</i>                                                                                                                                                                    | <i>No or very minor concerns</i> | <i>Moderate confidence</i> | Five studies with similar findings; minor concerns related to methods and limited treatment scope (surgery).                                                    |
| <u>Environmental context and resources</u> , parents expressed challenges in navigating the healthcare system and interacting with professionals to find the “right doctor” or care team for their child. Parents value having their concerns heard and being engaged in the decision-making process.                                                                                                       | Baca/Pieters<br>Heath<br>Ozanne                      | <i>Minor concerns:</i><br>Nature of relationship between researchers and participants not reported; retrospective recruitment. <sup>1</sup> | <i>No or very minor concerns:</i><br>Findings reflect the complexity and variation of data | <i>Moderate concerns:</i> The three studies are limited to surgery and to US, Sweden and the UK. Healthcare barriers seemed particularly salient to U.S. respondents (including insurance barriers) | <i>No or very minor concerns</i> | <i>Low confidence</i>      | Three studies with similar findings; moderate concerns related to methods, limited scope (surgery), and context-specific healthcare experiences of participants |

<sup>1</sup>Retrospective recruitment raises concerns about selection bias.

<sup>2</sup>We only downgraded for adequacy due to studies being limited to surgery when the summarized theme was based on parent's general feelings about epilepsy and could thus potentially apply to parent decisions regarding other treatment choices.

1  
2  
3  
4  
5  
6  
7  
8  
9  
10  
11  
12  
13  
14  
15  
16  
17  
18  
19  
20  
21  
22  
23  
24  
25  
26  
27  
28  
29  
30  
31  
32  
33  
34  
35  
36  
37  
38  
39  
40  
41  
42  
43  
44  
45  
46  
47

Figure 1 Legend: Preferred Reporting Items for Systematic Reviews and Meta-Analyses flow diagram of studies identified

Figure 2 Legend: Figure 2 presents the six theoretical domains identified in this review that impacted treatment decision-making and presents the main themes representing those domains

For peer review only

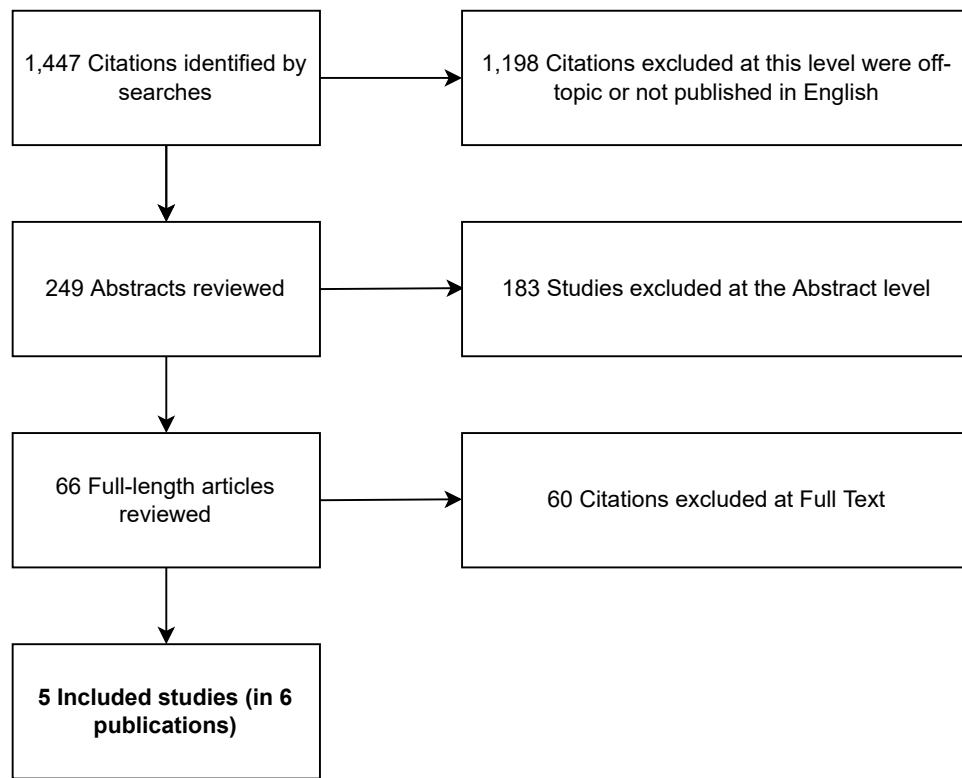



1  
2  
3  
4  
5  
6  
7  
8  
9  
10  
11  
12  
13  
14  
15  
16  
17  
18  
19  
20  
21  
22  
23  
24  
25  
26  
27  
28  
29  
30  
31  
32  
33  
34  
35  
36  
37  
38  
39  
40  
41  
42  
43  
44  
45  
46

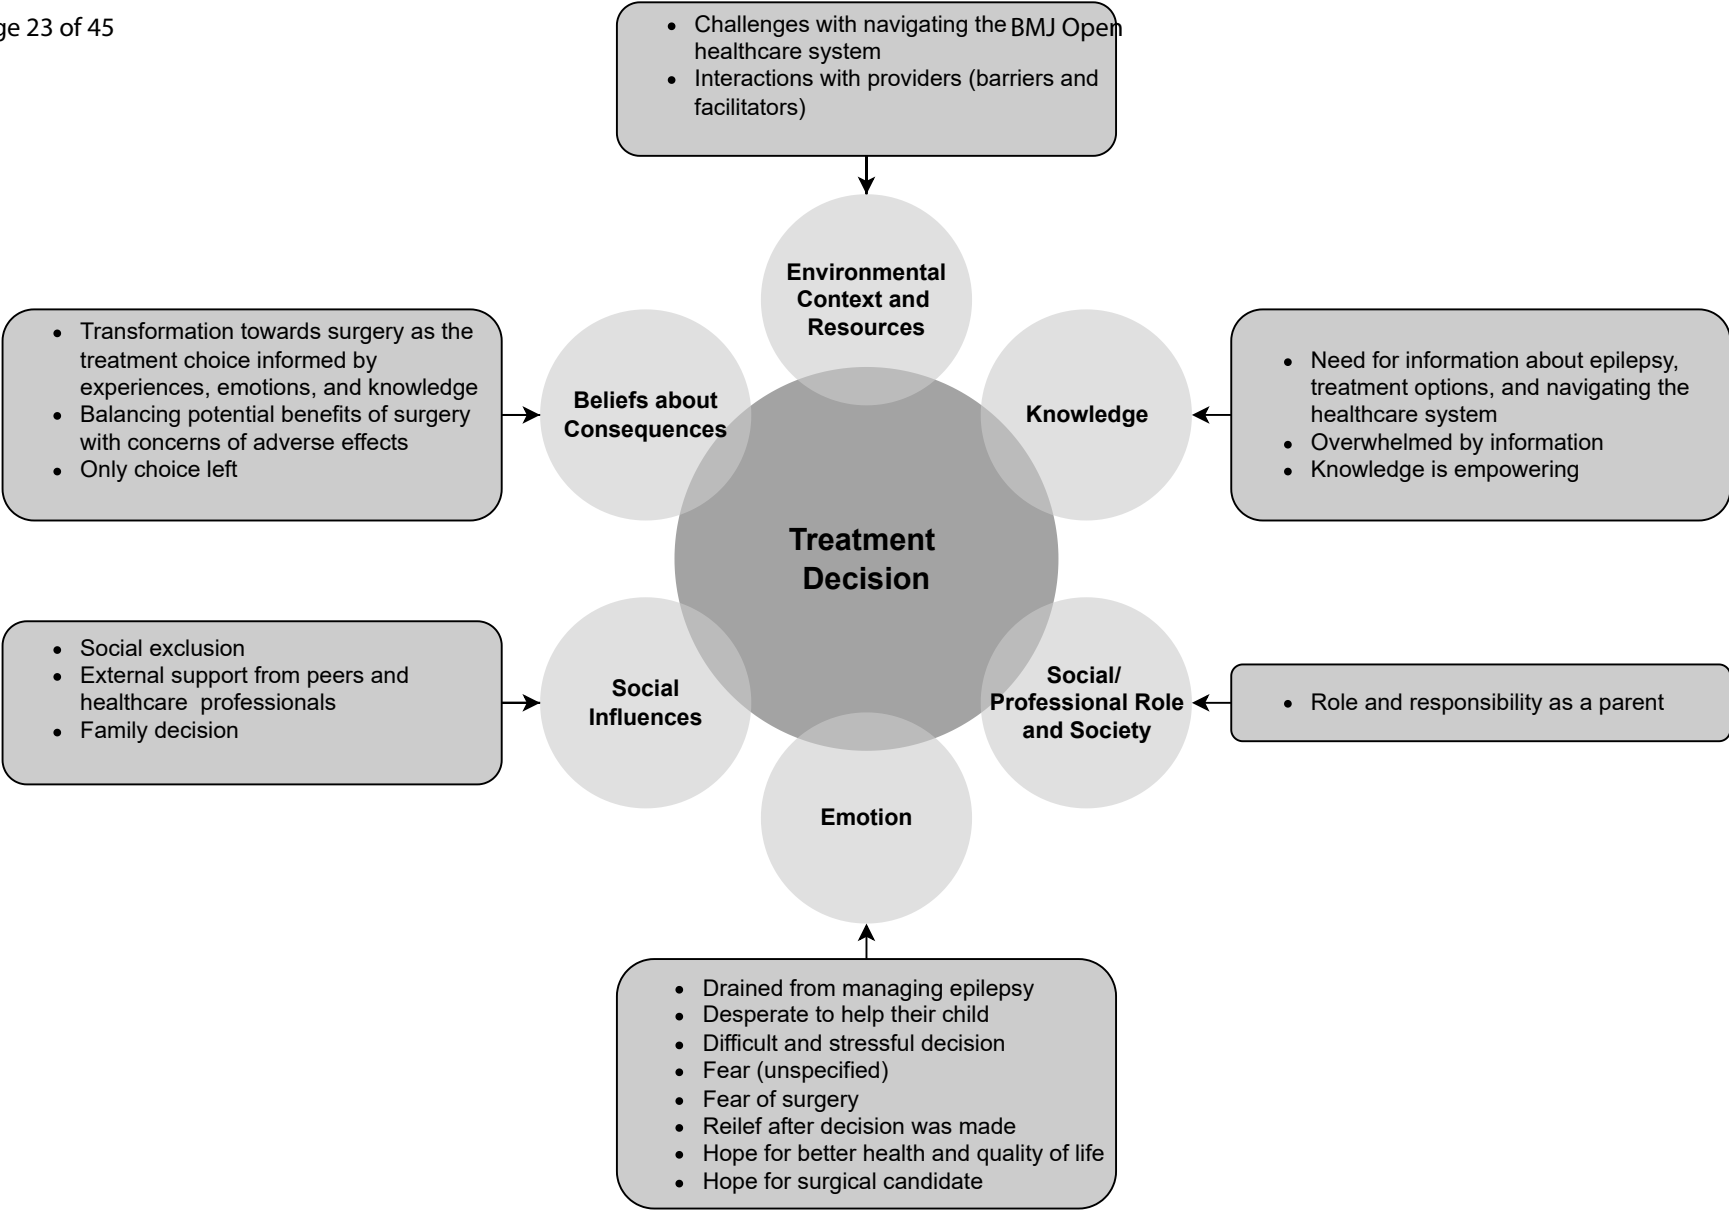

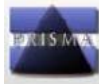

## PRISMA 2020 Checklist

| Section and Topic             | Item # | Checklist item                                                                                                                                                                                                                                                                                       | Location where item is reported |
|-------------------------------|--------|------------------------------------------------------------------------------------------------------------------------------------------------------------------------------------------------------------------------------------------------------------------------------------------------------|---------------------------------|
| <b>TITLE</b>                  |        |                                                                                                                                                                                                                                                                                                      |                                 |
| Title                         | 1      | Identify the report as a systematic review.                                                                                                                                                                                                                                                          | Title page                      |
| <b>ABSTRACT</b>               |        |                                                                                                                                                                                                                                                                                                      |                                 |
| Abstract                      | 2      | See the PRISMA 2020 for Abstracts checklist.                                                                                                                                                                                                                                                         |                                 |
| <b>INTRODUCTION</b>           |        |                                                                                                                                                                                                                                                                                                      |                                 |
| Rationale                     | 3      | Describe the rationale for the review in the context of existing knowledge.                                                                                                                                                                                                                          | Background, pg 3                |
| Objectives                    | 4      | Provide an explicit statement of the objective(s) or question(s) the review addresses.                                                                                                                                                                                                               | Pg 3                            |
| <b>METHODS</b>                |        |                                                                                                                                                                                                                                                                                                      |                                 |
| Eligibility criteria          | 5      | Specify the inclusion and exclusion criteria for the review and how studies were grouped for the syntheses.                                                                                                                                                                                          | Pg 3-4                          |
| Information sources           | 6      | Specify all databases, registers, websites, organisations, reference lists and other sources searched or consulted to identify studies. Specify the date when each source was last searched or consulted.                                                                                            | Pg 3, Appendix A                |
| Search strategy               | 7      | Present the full search strategies for all databases, registers and websites, including any filters and limits used.                                                                                                                                                                                 | Appendix A                      |
| Selection process             | 8      | Specify the methods used to decide whether a study met the inclusion criteria of the review, including how many reviewers screened each record and each report retrieved, whether they worked independently, and if applicable, details of automation tools used in the process.                     | Pg 4-5                          |
| Data collection process       | 9      | Specify the methods used to collect data from reports, including how many reviewers collected data from each report, whether they worked independently, any processes for obtaining or confirming data from study investigators, and if applicable, details of automation tools used in the process. | Pg 4-5                          |
| Data items                    | 10a    | List and define all outcomes for which data were sought. Specify whether all results that were compatible with each outcome domain in each study were sought (e.g. for all measures, time points, analyses), and if not, the methods used to decide which results to collect.                        | Pg 4-5                          |
|                               | 10b    | List and define all other variables for which data were sought (e.g. participant and intervention characteristics, funding sources). Describe any assumptions made about any missing or unclear information.                                                                                         | Pg 4-5                          |
| Study risk of bias assessment | 11     | Specify the methods used to assess risk of bias in the included studies, including details of the tool(s) used, how many reviewers assessed each study and whether they worked independently, and if applicable, details of automation tools used in the process.                                    | Pg 4-5                          |
| Effect measures               | 12     | Specify for each outcome the effect measure(s) (e.g. risk ratio, mean difference) used in the synthesis or presentation of results.                                                                                                                                                                  | NA                              |
| Synthesis methods             | 13a    | Describe the processes used to decide which studies were eligible for each synthesis (e.g. tabulating the study intervention characteristics and comparing against the planned groups for each synthesis (item #5)).                                                                                 | Pg 4-5, Table 1                 |
|                               | 13b    | Describe any methods required to prepare the data for presentation or synthesis, such as handling of missing summary statistics, or data conversions.                                                                                                                                                | Pg 4-5                          |
|                               | 13c    | Describe any methods used to tabulate or visually display results of individual studies and syntheses.                                                                                                                                                                                               | Pg 4-5                          |
|                               | 13d    | Describe any methods used to synthesize results and provide a rationale for the choice(s). If meta-analysis was performed, describe the model(s), method(s) to identify the presence and extent of statistical heterogeneity, and software package(s) used.                                          | Pg 4-5                          |
|                               | 13e    | Describe any methods used to explore possible causes of heterogeneity among study results (e.g. subgroup analysis, meta-regression).                                                                                                                                                                 | Pg 4-5                          |
|                               | 13f    | Describe any sensitivity analyses conducted to assess robustness of the synthesized results.                                                                                                                                                                                                         | NA                              |
| Reporting bias assessment     | 14     | Describe any methods used to assess risk of bias due to missing results in a synthesis (arising from reporting biases).                                                                                                                                                                              | Pg 4-5< Appendix D              |

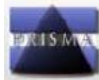

## PRISMA 2020 Checklist

| Section and Topic                              | Item # | Checklist item                                                                                                                                                                                                                                                                       | Location where item is reported |
|------------------------------------------------|--------|--------------------------------------------------------------------------------------------------------------------------------------------------------------------------------------------------------------------------------------------------------------------------------------|---------------------------------|
| Certainty assessment                           | 15     | Describe any methods used to assess certainty (or confidence) in the body of evidence for an outcome.                                                                                                                                                                                | Pg. 4-5, Table 2                |
| <b>RESULTS</b>                                 |        |                                                                                                                                                                                                                                                                                      |                                 |
| Study selection                                | 16a    | Describe the results of the search and selection process, from the number of records identified in the search to the number of studies included in the review, ideally using a flow diagram.                                                                                         | Pg 5                            |
|                                                | 16b    | Cite studies that might appear to meet the inclusion criteria, but which were excluded, and explain why they were excluded.                                                                                                                                                          | Pg 5                            |
| Study characteristics                          | 17     | Cite each included study and present its characteristics.                                                                                                                                                                                                                            | Pg 5, Table 1                   |
| Risk of bias in studies                        | 18     | Present assessments of risk of bias for each included study.                                                                                                                                                                                                                         | Appendix D                      |
| Results of individual studies                  | 19     | For all outcomes, present, for each study: (a) summary statistics for each group (where appropriate) and (b) an effect estimate and its precision (e.g. confidence/credible interval), ideally using structured tables or plots.                                                     | Table 2                         |
| Results of syntheses                           | 20a    | For each synthesis, briefly summarise the characteristics and risk of bias among contributing studies.                                                                                                                                                                               | Pg 5                            |
|                                                | 20b    | Present results of all statistical syntheses conducted. If meta-analysis was done, present for each the summary estimate and its precision (e.g. confidence/credible interval) and measures of statistical heterogeneity. If comparing groups, describe the direction of the effect. | Pg 6-8                          |
|                                                | 20c    | Present results of all investigations of possible causes of heterogeneity among study results.                                                                                                                                                                                       | Pg 6-8                          |
|                                                | 20d    | Present results of all sensitivity analyses conducted to assess the robustness of the synthesized results.                                                                                                                                                                           | NA                              |
| Reporting biases                               | 21     | Present assessments of risk of bias due to missing results (arising from reporting biases) for each synthesis assessed.                                                                                                                                                              | NA                              |
| Certainty of evidence                          | 22     | Present assessments of certainty (or confidence) in the body of evidence for each outcome assessed.                                                                                                                                                                                  | Pg 6-8, Table 2                 |
| <b>DISCUSSION</b>                              |        |                                                                                                                                                                                                                                                                                      |                                 |
| Discussion                                     | 23a    | Provide a general interpretation of the results in the context of other evidence.                                                                                                                                                                                                    | Pg 9                            |
|                                                | 23b    | Discuss any limitations of the evidence included in the review.                                                                                                                                                                                                                      | Pg 10                           |
|                                                | 23c    | Discuss any limitations of the review processes used.                                                                                                                                                                                                                                | Pg 10                           |
|                                                | 23d    | Discuss implications of the results for practice, policy, and future research.                                                                                                                                                                                                       | Pg 9-10                         |
| <b>OTHER INFORMATION</b>                       |        |                                                                                                                                                                                                                                                                                      |                                 |
| Registration and protocol                      | 24a    | Provide registration information for the review, including register name and registration number, or state that the review was not registered.                                                                                                                                       | Not registered                  |
|                                                | 24b    | Indicate where the review protocol can be accessed, or state that a protocol was not prepared.                                                                                                                                                                                       | NA                              |
|                                                | 24c    | Describe and explain any amendments to information provided at registration or in the protocol.                                                                                                                                                                                      | NA                              |
| Support                                        | 25     | Describe sources of financial or non-financial support for the review, and the role of the funders or sponsors in the review.                                                                                                                                                        | Pg 11                           |
| Competing interests                            | 26     | Declare any competing interests of review authors.                                                                                                                                                                                                                                   | Pg 11                           |
| Availability of data, code and other materials | 27     | Report which of the following are publicly available and where they can be found: template data collection forms; data extracted from included studies; data used for all analyses; analytic code; any other materials used in the review.                                           | Pg 11                           |

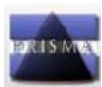

## PRISMA 2020 Checklist

- 1
- 2
- 3
- 4
- 5
- 6
- 7
- 8
- 9
- 10
- 11
- 12
- 13
- 14
- 15
- 16
- 17
- 18
- 19
- 20
- 21
- 22
- 23
- 24
- 25
- 26
- 27
- 28
- 29
- 30
- 31
- 32
- 33
- 34
- 35
- 36
- 37
- 38
- 39
- 40
- 41
- 42
- 43
- 44
- 45
- 46
- 47

From: Page MJ, McKenzie JE, Bossuyt PM, Boutron I, Hoffmann TC, Mulrow CD, et al. The PRISMA 2020 statement: an updated guideline for reporting systematic reviews. *BMJ* 2021;372:n71. doi: 10.1136/bmj.n71  
For more information, visit: <http://www.prisma-statement.org/>

For peer review only

# APPENDIX A: Search Strategy

## EMBASE (Searched January 1, 1999, to August 19, 2021)

| Set | Concept                                                            | Search statement                                                                                                                                                                                                                                                                                                                                                                                                                                                                                                                                                                                                                                                                                                                                                                                   |
|-----|--------------------------------------------------------------------|----------------------------------------------------------------------------------------------------------------------------------------------------------------------------------------------------------------------------------------------------------------------------------------------------------------------------------------------------------------------------------------------------------------------------------------------------------------------------------------------------------------------------------------------------------------------------------------------------------------------------------------------------------------------------------------------------------------------------------------------------------------------------------------------------|
| 1   | Infantile/<br>Pediatric Epilepsies                                 | 'benign childhood epilepsy'/exp OR 'childhood absence epilepsy'/exp OR 'severe myoclonic epilepsy in infancy'/exp OR (dravet* NEXT/1 (disease OR syndrome))                                                                                                                                                                                                                                                                                                                                                                                                                                                                                                                                                                                                                                        |
| 2   | 0-3 Age Group and Epilepsy                                         | [infant]/lim OR [newborn]/lim OR newborn/exp OR [preschool]/lim OR 'preschool child'/exp OR toddler/exp OR (babies OR baby OR child*:ti OR infan* OR neonat* OR newborn* OR nicu OR paediatric* OR pediatric* OR preschool* OR toddler* OR 'very young'):ab,ti,kw OR ('younger than' OR under OR below) NEAR/3 (3 OR three) OR (3 OR three) NEAR/3 ('or below' OR 'or under' OR 'or younger') AND ('epilepsy'/exp OR 'epileptic patient'/exp OR epilep*:ti)                                                                                                                                                                                                                                                                                                                                        |
| 3   | Infantile Spasms/<br>Neonatal Seizures<br>(not requiring epilepsy) | 'infantile spasm'/exp OR (((infan* OR neonat* OR newborn*) NEAR/2 (convuls* OR seizure* OR spasm*)):ab,ti,kw)                                                                                                                                                                                                                                                                                                                                                                                                                                                                                                                                                                                                                                                                                      |
| 4   | Other Seizures (not requiring Epilepsy)                            | ([infant]/lim OR [newborn]/lim OR 'newborn'/exp OR babies:ab,ti,kw OR baby:ab,ti,kw OR infan*:ab,ti,kw OR neonat*:ab,ti,kw OR newborn*:ab,ti,kw OR nicu:ab,ti,kw) AND ('febrile convulsion'/exp OR 'seizure'/exp OR convuls*:ab,ti,kw OR spasm*:ab,ti,kw OR seizure*:ab,ti,kw)                                                                                                                                                                                                                                                                                                                                                                                                                                                                                                                     |
| 5   | Pharmacologic/<br>Vitamin Treatment                                | acetazolamide OR acth OR 'adrenocorticotrophic hormone' OR benzodiazepine* OR brivaracetam OR bromide OR cannabidiol OR carbamazepine OR clobazam OR clonazepam OR clorazepate OR corticotropin OR divalproex OR eslicarbazepine OR ethosuximide OR everolimus OR felbamate OR fenfluramine OR folate OR 'folic acid' OR frisium OR gabapentin OR lacosamide OR lamotrigine OR levetiracetam OR liposteroid OR lorazepam OR mesuximide OR methsuximide OR onfi OR oxcarbazepine OR perampanel OR phenobarbital OR phenytoin OR prednisone OR pregabalin OR primidone OR pyridoxine OR 'pyridoxal 5 phosphate' OR rufinamide OR sabril OR stiripentol OR thiopental OR thiopentone OR tiagabine OR topiramate OR valproate OR 'valproate semisodium' OR 'valproic acid' OR vigabatrin OR zonisamide |
| 6   | Diet<br>Therapy                                                    | 'ketogenic diet'/de OR (keto* OR ketogenic OR 'low glycemic index' OR 'medium chain triglyceride' OR 'modified atkins' OR 'modified keto' OR 'modified ketogenic'):ab,ti,kw                                                                                                                                                                                                                                                                                                                                                                                                                                                                                                                                                                                                                        |
| 7   | Surgical Procedures                                                | craniotomy/de OR hemispherectomy/de OR 'laser surgery'/de OR lobectomy/de OR 'corpus callosotomy' OR craniotom* OR (disconnect* NEAR/3 (hemispher* OR surg* OR procedure*)) OR hemispherectom* OR hemispherotom* OR lesionectom* OR lobectom* OR (laser* NEAR/3 (ablat* OR operat* OR procedure* OR surg*)) OR (multilobar NEAR/3 disconnect*) OR (palliat* NEAR/3 operat* OR procedure* OR surg*) OR resect* OR resection OR transect* OR transection* OR 'sublobar resection' OR 'subpial transection'                                                                                                                                                                                                                                                                                           |
| 8   | Brain Stimulation                                                  | 'brain depth stimulation'/de OR 'brain responsive neurostimulator'/de OR 'deep brain stimulator'/de OR 'nerve stimulation'/de OR 'nerve stimulator'/de OR 'vagus nerve stimulation'/de OR ('brain stimulat*' OR 'deep brain stimulat*' OR 'electric brain stimulat*' OR 'external trigeminal nerve stimulat*' OR 'responsive brain stimulat*' OR 'responsive neurostimulat*' OR 'vagus nerve stimulat*' OR stimulation OR stimulator*) OR ((brain OR 'deep brain' OR electric* OR responsive OR 'vagus nerve') NEAR/2 (electrostim* OR stimulat*)) OR neurostim*                                                                                                                                                                                                                                   |

|    |                                                              |                                                                                                                                                                                                                                                                                                                                                                                                                                                                                                                                                                                                                                                                                                                                                                                                                                                                                                                                                                                 |
|----|--------------------------------------------------------------|---------------------------------------------------------------------------------------------------------------------------------------------------------------------------------------------------------------------------------------------------------------------------------------------------------------------------------------------------------------------------------------------------------------------------------------------------------------------------------------------------------------------------------------------------------------------------------------------------------------------------------------------------------------------------------------------------------------------------------------------------------------------------------------------------------------------------------------------------------------------------------------------------------------------------------------------------------------------------------|
| 9  | Harms                                                        | anhidrosis/de OR 'adverse event'/de OR 'adverse drug reaction'/de OR 'behavior disorder'/de OR 'cognitive defect'/de OR 'developmental delay'/de OR 'developmental disorder'/de OR dystonia/de OR 'liver injury'/de OR 'loss of appetite'/de OR 'motor dysfunction'/de OR 'organ damage'/de OR 'patient harm'/de OR 'sleep disorder'/de OR sweating/de OR (advers* OR harm* OR 'side effect'):ab,ti,kw OR anhidrosis OR (appetite NEAR/3 (lose OR losing OR loss)) OR ((cognitiv* OR behavior* OR develop* OR motor OR movement OR neurodevelop*) NEAR/3 (effect* OR disorder* OR problem* OR symptom*)) OR ((cognitiv* OR develop* OR neurodevelopment*) NEAR/3 (delay* OR disorder* OR regress*)) OR dystonia OR hypohidrosis OR hypohydrosis OR (liver NEAR/3 (damag* OR injur*)) OR (miss* NEAR/3 milestone*) OR ((eat* OR perspir* OR sweat* OR sleep*) NEAR/3 (disorder* OR inability OR unable))                                                                         |
| 10 | Parental Preferences                                         | parent/de OR (parent* OR mother* OR father*):ab,ti,kw                                                                                                                                                                                                                                                                                                                                                                                                                                                                                                                                                                                                                                                                                                                                                                                                                                                                                                                           |
| 11 | Untreated Disease                                            | 'treatment refusal'/de OR ('not treated' OR 'no treatment' OR untreat*):ab,ti,kw OR (declin* OR forgo* OR 'not' OR no OR refus* OR withheld OR withhold*) NEXT/3 (treated OR treatment*)                                                                                                                                                                                                                                                                                                                                                                                                                                                                                                                                                                                                                                                                                                                                                                                        |
| 12 | Study Designs/<br>Publication Types                          | [english]/lim AND [1999-2020]/py NOT ([animals]/lim NOT [humans]/lim OR abstract:nc OR annual:nc OR 'book'/de OR ((case NEXT/1 (report* OR stud*)):ti) OR 'case report'/de OR 'case study'/de OR conference:nc OR 'conference abstract':it OR 'conference paper'/de OR 'conference paper':it OR 'conference proceeding':pt OR 'conference review':it OR congress:nc OR diagnos*:ti OR 'diagnosis'/mj OR 'diagnostic accuracy'/mj OR 'diagnostic procedures'/mj OR 'diagnostic test'/mj OR 'diagnostic test accuracy study'/mj OR 'differential diagnosis'/mj OR 'editorial'/de OR editorial:it OR 'erratum'/de OR guideline*:ti OR letter:it OR 'note'/de OR note:it OR meeting:nc OR 'practice guideline'/de OR 'review'/exp OR sessions:nc OR 'short survey'/de OR symposium:nc OR animal*:ti OR experimental:ti OR (vitro:ti NOT vivo:ti) OR canine:ti OR dog:ti OR dogs:ti OR mouse:ti OR mice:ti OR rabbit*:ti OR rat:ti OR rats:ti OR rodent*:ti OR sheep:ti OR swine:ti) |
| 13 | Combine sets                                                 | #1 OR #2 OR #3 OR #4                                                                                                                                                                                                                                                                                                                                                                                                                                                                                                                                                                                                                                                                                                                                                                                                                                                                                                                                                            |
| 14 | Combine sets<br>(KQ1 Pharmacology)                           | #13 AND #12 AND #5                                                                                                                                                                                                                                                                                                                                                                                                                                                                                                                                                                                                                                                                                                                                                                                                                                                                                                                                                              |
| 15 | Combine sets<br>(KQ2 Diet, Surgery, Brain Stimulation)       | #13 AND #12 AND (#6 OR #7 OR #8)                                                                                                                                                                                                                                                                                                                                                                                                                                                                                                                                                                                                                                                                                                                                                                                                                                                                                                                                                |
| 16 | Combine sets<br>(KQ3 Treatment Harms)                        | #13 AND #12 AND (#5 OR #6 OR #7 OR #8) AND 9                                                                                                                                                                                                                                                                                                                                                                                                                                                                                                                                                                                                                                                                                                                                                                                                                                                                                                                                    |
| 17 | Combine sets<br>(CQ1 Parental Preferences)                   | #13 AND #12 AND (#5 OR #6 OR #7 OR #8) AND #10                                                                                                                                                                                                                                                                                                                                                                                                                                                                                                                                                                                                                                                                                                                                                                                                                                                                                                                                  |
| 18 | Combine sets<br>(CQ2 Untreated/<br>Uncontrolled<br>Epilepsy) | #11 AND #12 AND #13                                                                                                                                                                                                                                                                                                                                                                                                                                                                                                                                                                                                                                                                                                                                                                                                                                                                                                                                                             |

|    |                         |                   |
|----|-------------------------|-------------------|
| 19 | Combine Sets<br>All KQs | #14 OR #15 OR #16 |
| 20 | Combine Sets<br>All CQs | #17 OR #18        |

### SocINDEX and Web of Science databases (Searched January 1, 1999, to August 19, 2021)

(epilep\* OR convuls\* OR seizure\* OR spasm\*)

AND

(acetazolamide OR acth OR 'adrenocorticotrophic hormone' OR benzodiazepine\* OR brivaracetam OR bromide OR cannabidiol OR carbamazepine OR clobazam OR clonazepam OR clorazepate OR corticotropin OR divalproex OR eslicarbazepine OR ethosuximide OR everolimus OR felbamate OR fenfluramine OR folate OR 'folic acid' OR frisium OR gabapentin OR lacosamide OR lamotrigine OR levetiracetam OR liposteroid OR lorazepam OR mesuximide OR methsuximide OR onfi OR oxcarbazepine OR perampanel OR phenobarbital OR phenytoin OR prednisone OR pregabalin OR primidone OR pyridoxine OR 'pyridoxal 5 phosphate' OR rufinamide OR sabril OR stiripentol OR thiopental OR thiopentone OR tiagabine OR topiramate OR valproate OR 'valproate semisodium' OR 'valproic acid' OR vigabatrin OR zonisamide OR keto\* OR ketogenic OR 'low glycemic index' OR 'medium chain triglyceride' OR 'modified atkins' OR 'modified keto' OR 'modified ketogenic' OR 'corpus callosotomy' OR craniotom\* OR (disconnect\* AND (hemispher\* OR surg\* OR procedure\*)) OR hemispherectom\* OR hemispherotom\* OR lesionectomy\* OR lobectomy\* OR (laser\* AND (ablat\* OR operat\* OR procedure\* OR surg\*)) OR (multilobar AND disconnect\*) OR (palliat\* AND operat\* OR procedure\* OR surg\*) OR resect\* OR resection OR transect\* OR transection\* OR 'sublobar resection' OR 'subpial transection' OR 'brain stimulat\*' OR 'deep brain stimulat\*' OR 'electric brain stimulat\*' OR 'external trigeminal nerve stimulat\*' OR 'responsive brain stimulat\*' OR 'responsive neurostimulat\*' OR 'vagus nerve stimulat\*' OR stimulation OR stimulator\*) OR ((brain OR 'deep brain' OR electric\* OR responsive OR 'vagus nerve') AND (electrostim\* OR stimulat\*)) OR neurostim\*)

AND

(parent\* OR mother\* OR father\*)

AND

(perception OR factor\* OR decision)

**CINAHL (Searched January 1, 1999, to August 19, 2021)**

| Set | Concept                              | Search statement                                                                                                                                                                                                                                                                                                                           |
|-----|--------------------------------------|--------------------------------------------------------------------------------------------------------------------------------------------------------------------------------------------------------------------------------------------------------------------------------------------------------------------------------------------|
| 1   | Childhood Epilepsy                   | "benign childhood epilepsy" OR "childhood absence epilepsy" OR "severe myoclonic epilepsy in infancy" OR dravet*                                                                                                                                                                                                                           |
| 2   | Epilepsy/<br>0-3 Age Group           | (babies OR baby OR child* OR infan* OR neonat* OR newborn* OR nicu OR paediatric* OR pediatric* OR preschool* OR toddler* OR "very young" OR "younger than three" OR "younger than 3" OR "under three" OR "under 3" OR "below three" OR "below 3" OR "3 or below" OR "3 or younger" OR "three or below" OR "three or younger") AND epilep* |
| 3   | Infantile Spasm/<br>Neonatal Seizure | "infantile spasm*" OR "neonatal seizure*" OR ((babies OR baby OR infan* OR neonat* OR newborn* OR nicu) AND (convuls* OR seizure* OR spasm*))                                                                                                                                                                                              |
| 4   | Parental Preferences                 | father* OR matern* OR mother* OR parent* OR patern*                                                                                                                                                                                                                                                                                        |
| 5   | Harms                                | "adverse drug reaction" OR "adverse effect*" OR "adverse event*" OR anhidrosis OR appetite* OR behavior* OR behaviour* OR cognitiv* OR defect* OR delay* OR development* OR disorder* OR dysfunction* OR dyston* OR harm* OR impair* OR injur* OR liver OR motor OR "organ damage*" OR "sleep disorder*" OR sweat* OR "side effect"        |
| 6   | Untreated<br>Disease                 | "treatment refusal" OR "not treated" OR "no treatment" OR untreat* OR "decline treatment" OR "declined treatment" OR "forgo* treatment" OR "refuse treatment" OR "refused treatment" OR "refusing treatment" OR "withheld treatment" OR "withhold treatment" OR "withholding treatment"                                                    |
| 7   | Combine Concepts                     | (S1 OR S2 OR S3) AND S4                                                                                                                                                                                                                                                                                                                    |
| 8   | Apply Limits                         | S7 AND (Published Date: 19990101-20210831; English Language; Exclude MEDLINE records)                                                                                                                                                                                                                                                      |
| 9   | Combine concepts                     | (S1 OR S2 OR S3) AND (S5 AND S6)                                                                                                                                                                                                                                                                                                           |
| 10  | Apply Limits                         | S9 AND (Published Date: 19990101-20210831; English Language; Exclude MEDLINE records)                                                                                                                                                                                                                                                      |

**PsycINFO (Searched January 1, 1999, to August 19, 2021)**

| Set | Concept                              | Search statement                                                                                                                                                                                                                                                                                                                                                                                      |
|-----|--------------------------------------|-------------------------------------------------------------------------------------------------------------------------------------------------------------------------------------------------------------------------------------------------------------------------------------------------------------------------------------------------------------------------------------------------------|
| 1   | Childhood<br>Epilepsy                | "benign childhood epilepsy" OR "childhood absence epilepsy" OR "severe myoclonic epilepsy in infancy" OR (dravet* adj1 (disease OR syndrome)) OR ((child* OR infan* OR paediatr* OR pediatr*) adj1 epilep*)                                                                                                                                                                                           |
| 2   | Epilepsy/<br>0-3 Age Group           | (baby OR babies OR infan* OR neonat* OR newborn* OR nicu OR paediatric* OR pediatric* OR preschool OR toddler* OR "very young" OR ("younger than" OR under OR below) adj3 ("3" OR three)) OR ("3" OR three) adj3 ("or below" OR "or under" OR "or younger")) AND (epilepsy/ OR epileptic seizures/ OR epileps* OR epileptic*)                                                                         |
| 3   | Infantile Spasm/<br>Neonatal Seizure | ((babies OR baby OR infan* OR neonat* OR newborn* OR nicu) adj3 (convuls* OR seizure* OR spasm*))                                                                                                                                                                                                                                                                                                     |
| 4   | Parental Preferences                 | parents/ OR (patern* OR parent* OR matern* OR mother* OR father*)                                                                                                                                                                                                                                                                                                                                     |
| 5   | Harms                                | behavior disorders/ OR cognitive impairment/ OR delayed development/ OR developmental disabilities/ OR liver disorders/ OR motor development/ OR "side effects (drug)"/ OR "side effects (treatment)"/ OR sleep wake disorders/ OR sweating/ OR (advers* OR anhidrosis OR dystoni* OR harm* OR harm* OR hypohidrosis OR hypohydrosis OR "organ damage") OR (appetite adj3 (lose* OR losing OR loss OR |



1  
2  
3  
4  
5  
6  
7  
8  
9  
10  
11  
12  
13  
14  
15  
16  
17  
18  
19  
20  
21  
22  
23  
24  
25  
26  
27  
28  
29  
30  
31  
32  
33  
34  
35  
36  
37  
38  
39  
40  
41  
42  
43  
44  
45  
46  
47

|    |                           |                                                                                                                                                                                                                                                                                                                                                                                                                         |
|----|---------------------------|-------------------------------------------------------------------------------------------------------------------------------------------------------------------------------------------------------------------------------------------------------------------------------------------------------------------------------------------------------------------------------------------------------------------------|
|    |                           | lost)) OR ((cognitiv* OR behavior* OR develop* OR motor OR movement OR neurodevelop*) adj3 (effect* OR deficit* OR disorder* OR problem* OR symptom*)) OR ((cognitiv* OR develop* OR motor* OR neurodevelopment*) adj3 (delay* OR disorder* OR regress*)) OR ((liver OR organ*) adj3 (damag* OR injur*)) OR (miss* adj3 milestone*) OR ((eat* OR perspir* OR sweat* OR sleep*) adj3 (disorder* OR inability OR unable)) |
| 6  | Untreated Disease         | treatment refusal/ OR ("not treated" OR "no treatment" OR untreat*) OR ((declin* OR forgo* OR "not" OR no OR refus* OR withheld OR withhold*) adj3 (treated OR treatment*))                                                                                                                                                                                                                                             |
| 7  | Combine Sets              | (1 OR 2 OR 3) AND 4                                                                                                                                                                                                                                                                                                                                                                                                     |
| 8  | Apply Limits              | limit 7 to yr="1999 - 2021"                                                                                                                                                                                                                                                                                                                                                                                             |
| 9  | Apply Limits              | limit 8 to up=19000101-20210819                                                                                                                                                                                                                                                                                                                                                                                         |
| 10 | Apply Limits              | 9 NOT (1* or 2* or 3* or 4* or 5* or 6* or 7* or 8* or 9*).pm.                                                                                                                                                                                                                                                                                                                                                          |
| 11 | CQ1                       | limit 10 to english language                                                                                                                                                                                                                                                                                                                                                                                            |
| 12 | Combine Sets              | (1 OR 2 OR 3) AND (5 AND 6)                                                                                                                                                                                                                                                                                                                                                                                             |
| 13 | Apply Limits Apply Limits | Limit 12 to yr="1999 - 2021"                                                                                                                                                                                                                                                                                                                                                                                            |
| 14 | Apply Limits              | limit 13 to up=19000101-20210819                                                                                                                                                                                                                                                                                                                                                                                        |
| 15 | Apply Limits              | 14 NOT (1* or 2* or 3* or 4* or 5* or 6* or 7* or 8* or 9*).pm.                                                                                                                                                                                                                                                                                                                                                         |
| 16 | CQ2                       | limit 5 to english language                                                                                                                                                                                                                                                                                                                                                                                             |

1  
2  
3  
4  
5  
6  
7  
8  
9  
10  
11  
12  
13  
14  
15  
16  
17  
18  
19  
20  
21  
22  
23  
24  
25  
26  
27  
28  
29  
30  
31  
32  
33  
34  
35  
36  
37  
38  
39  
40  
41  
42  
43  
44  
45  
46  
47

## APPENDIX B: The Theoretical Domains Framework\*

| Domain                                       | Definition                                                                                                                                | Constructs                                                                                                                                                                                   |
|----------------------------------------------|-------------------------------------------------------------------------------------------------------------------------------------------|----------------------------------------------------------------------------------------------------------------------------------------------------------------------------------------------|
| <b>Knowledge</b>                             | An awareness of the existence of something                                                                                                | Knowledge (including knowledge of condition/scientific rationale)<br>Procedural knowledge<br>Knowledge of task environment                                                                   |
| <b>Skills</b>                                | An ability or proficiency acquired through practice                                                                                       | Skills<br>Skills development<br>Competence<br>Ability<br>Interpersonal skills<br>Practice<br>Skill assessment                                                                                |
| <b>Social/professional role and identity</b> | A coherent set of behaviors and displayed personal qualities of an individual in a social or work setting                                 | Professional identity<br>Professional role<br>Social identity<br>Identity<br>Professional boundaries<br>Professional confidence<br>Group identity<br>Leadership<br>Organizational commitment |
| <b>Beliefs about capabilities</b>            | Acceptance of the truth, reality or validity about an ability, talent or faculty that a person can put to constructive use)               | Self-confidence<br>Perceived competence<br>Self-efficacy<br>Perceived behavioral control<br>Beliefs<br>Self-esteem<br>Empowerment<br>Professional confidence                                 |
| <b>Optimism</b>                              | The confidence that things will happen for the best or that desired goals will be attained                                                | Optimism<br>Pessimism<br>Unrealistic optimism<br>Identity                                                                                                                                    |
| <b>Beliefs about Consequences</b>            | Acceptance of the truth, reality, or validity about outcomes of a behaviour in a given situation                                          | Beliefs<br>Outcome expectancies<br>Characteristics of outcome expectancies<br>Anticipated regret<br>Consequents                                                                              |
| <b>Reinforcement:</b>                        | Increasing the probability of a response by arranging a dependent relationship, or contingency, between the response and a given stimulus | Rewards (proximal/distal, valued/not valued, probable/improbable)<br>Incentives<br>Punishment<br>Consequents<br>Reinforcement<br>Contingencies<br>Sanctions                                  |

1  
2  
3  
4  
5  
6  
7  
8  
9  
10  
11  
12  
13  
14  
15  
16  
17  
18  
19  
20  
21  
22  
23  
24  
25  
26  
27  
28  
29  
30  
31  
32  
33  
34  
35  
36  
37  
38  
39  
40  
41  
42  
43  
44  
45  
46  
47

| Domain                                          | Definition                                                                                                                                                                             | Constructs                                                                                                                                                                                    |
|-------------------------------------------------|----------------------------------------------------------------------------------------------------------------------------------------------------------------------------------------|-----------------------------------------------------------------------------------------------------------------------------------------------------------------------------------------------|
| <b>Intention</b>                                | A conscious decision to perform a behaviour or a resolve to act in a certain way                                                                                                       | Stability of intentions<br>Stages of change model<br>Transtheoretical model and stages of change                                                                                              |
| <b>Goals</b>                                    | Mental representations of outcomes or end states that an individual wants to achieve                                                                                                   | Goals (distal/proximal)<br>Goal priority<br>Goal/target setting<br>Goals (autonomous/controlled)<br>Action planning<br>Implementation intention                                               |
| <b>Memory, attention and decision processes</b> | The ability to retain information, focus selectively on aspects of the environment and choose between two or more alternatives                                                         | Memory<br>Attention<br>Attention control<br>Decision-making<br>Cognitive overload/tiredness                                                                                                   |
| <b>Environmental context and resources</b>      | Any circumstance of a person's situation or environment that discourages or encourages the development of skills and abilities, independence, social competence and adaptive behaviour | Environmental stressors<br>Resources/material resources<br>Organizational culture/climate<br>Salient events/critical incidents<br>Person environment interaction<br>Barriers and facilitators |
| <b>Social influences</b>                        | Those interpersonal processes that can cause individuals to change their thoughts, feelings, or behaviours                                                                             | Social pressure<br>Social norms<br>Group conformity<br>Social comparisons<br>Group norms<br>Social support<br>Power<br>Intergroup conflict<br>Alienation<br>Group identity<br>Modelling       |
| <b>Emotion</b>                                  | A complex reaction pattern, involving experiential, behavioural, and physiological elements, by which the individual attempts to deal with a personally significant matter or event    | Fear<br>Anxiety<br>Affect<br>Stress<br>Depression<br>Positive/negative affect<br>Burn-out                                                                                                     |
| <b>Behavioral regulation</b>                    | Anything aimed at managing or changing objectively observed or measured actions                                                                                                        | Self-monitoring<br>Breaking habit<br>Action planning                                                                                                                                          |

\*British spelling of definitions is kept from original publication  
 Atkins L, Francis J, Islam R, O'Connor D, Patey A, Ivers N, Foy R, Duncan EM, Colquhoun H, Grimshaw JM, Lawton R, Michie S. A guide to using the Theoretical Domains Framework of behaviour change to investigate implementation problems. *Implement Sci.* 2017 Jun 21;12(1):77. doi: 10.1186/s13012-017-0605-9. PMID: 28637486; PMCID: PMC5480145.

### APPENDIX C. CERQual assessment components

| CERQual Components         | Definition                                                                                                                                                                                               |
|----------------------------|----------------------------------------------------------------------------------------------------------------------------------------------------------------------------------------------------------|
| Methodological limitations | The extent to which there are problems in the design or conduct of the primary studies supporting a review finding. We used our CASP assessment of each study to guide our assessment of this component. |
| Coherence                  | An assessment of how clear and cogent the fit is between the data from the primary studies and the review finding.                                                                                       |
| Relevance                  | The extent to which the body of evidence from the primary studies supporting a review finding is applicable to the context specified in the review question.                                             |
| Adequacy                   | The degree of richness and quantity of data supporting a review finding.                                                                                                                                 |

Noyes J, Booth A, Lewin S, et al. Applying GRADE-CERQual to qualitative evidence synthesis findings—paper 6: how to assess relevance of the data. *Implement Sci*. 2018 Jan 25;13(Suppl 1):4. doi: 10.1186/s13012-017-0693-6. PMID: 29384080.

APPENDIX D. Methodological appraisal ratings using the CASP tool

| CASP question                                                                   | Study            |                  |                   |                  |                           |
|---------------------------------------------------------------------------------|------------------|------------------|-------------------|------------------|---------------------------|
|                                                                                 | O'Brien, 2020    | Syiven, 2020     | Heath et al. 2016 | Ozanne, 2016     | Pieters, 2016; Baca, 2015 |
| Was there a clear statement of the aims of the research?                        | Yes              | Yes              | Yes               | Yes              | Yes                       |
| Was the qualitative methodology appropriate?                                    | Yes              | Yes              | Yes               | Yes              | Yes                       |
| Was the research design appropriate to address the aims of the research?        | Yes              | Yes              | Yes               | Yes              | Yes                       |
| Was the recruitment strategy appropriate to the aims of the research?           | No <sup>1</sup>  | No <sup>1</sup>  | No <sup>1</sup>   | No <sup>1</sup>  | No <sup>1</sup>           |
| Was data collected in a way that addressed the research issue                   | Yes              | Yes              | Yes               | Yes              | Yes                       |
| Was the relationship between researcher and participants adequately considered? | Can't tell       | Can't tell       | Can't tell        | Yes <sup>2</sup> | Can't tell                |
| Were ethical issues taken into consideration?                                   | Yes <sup>3</sup> | Yes <sup>3</sup> | Yes <sup>3</sup>  | Yes <sup>3</sup> | Can't tell                |
| Was there sufficient rigor?                                                     | Yes              | Yes              | Yes               | Yes              | Yes                       |
| Is there a clear statement of findings?                                         | Yes              | Yes              | Yes               | Yes              | Yes                       |
| How valuable is the research? <sup>4</sup>                                      | Yes              | Yes              | Yes               | Yes              | Yes                       |
| Overall risk to rigor                                                           | Low              | Low              | Low               | Low              | Low                       |

Abbreviations: CASP: Critical Appraisal Skills Programme

<sup>1</sup> Participants in these studies were recruited after their child underwent surgery, raising concerns about selection bias due to selecting parents who were a) referred to surgery, b) proceeded with surgery, and c) experience some level of success with surgery. Excludes parents of a child with drug-resistant surgery who were not referred to surgery, who choose not to proceed with surgery, or whose child did not achieve desired outcomes.

<sup>2</sup> Interviewers and researchers not part of care/surgery team

<sup>3</sup> Approved by university ethics committee

<sup>4</sup> "Yes" rating given when study: a) discussed contribution to existing knowledge or understanding, b) identified new areas where research is necessary, and c) discussed whether or how the findings can be transferred to other populations or considered other ways the research may be used

### APPENDIX E. Coding extracts for treatment decisions for childhood epilepsy into the Theoretical Domains Framework

| TDF domain | Author, Year, PMID      | Extracted text <sup>A</sup>                                                                                                                                                                                                                                                                                                                                                                                                                                                                                                                              | Theme                                                                                        |
|------------|-------------------------|----------------------------------------------------------------------------------------------------------------------------------------------------------------------------------------------------------------------------------------------------------------------------------------------------------------------------------------------------------------------------------------------------------------------------------------------------------------------------------------------------------------------------------------------------------|----------------------------------------------------------------------------------------------|
| Knowledge  | Baca, 2015, 25894906    | With the recognition that “something is wrong,” parents sought information from multiple sources in an attempt to understand seizures and epilepsy and become better advocates for their child.                                                                                                                                                                                                                                                                                                                                                          | Need for information about epilepsy, treatment options, and navigating the healthcare system |
| Knowledge  | Baca, 2015, 25894906    | Parents reported difficulties as they sought information about seizures, epilepsy, medications, and surgery....Parents sought information from a variety of disparate sources including physicians, the Internet, books, and family/friends.                                                                                                                                                                                                                                                                                                             | Need for information about epilepsy, treatment options, and navigating the healthcare system |
| Knowledge  | Baca, 2015, 25894906    | Through this journey, parents learned to navigate a complicated medical system filled with doctors of different specialties, multiple hospitals, insurance approvals, and numerous treatment options                                                                                                                                                                                                                                                                                                                                                     | Need for information about epilepsy, treatment options, and navigating the healthcare system |
| Knowledge  | Peters, 2016, 27521720  | Parents also had to learn about the intricacies of the healthcare system including the types of doctors that were needed to care for their children                                                                                                                                                                                                                                                                                                                                                                                                      | Need for information about epilepsy, treatment options, and navigating the healthcare system |
| Knowledge  | Heath, 2016, 27371883   | Parents perceived the information they received from professionals as inadequate to make an informed decision. They therefore sought out additional information regarding the surgical procedure and outcomes. Aiming to comprehend what surgery would entail, parents requested information in lay language and searched the internet for information and videos.                                                                                                                                                                                       | Need for information about epilepsy, treatment options, and navigating the healthcare system |
| Knowledge  | Heath, 2016, 27371883   | “I googled it until I couldn't google anymore and I think that gave me a better understanding of what was going on.”                                                                                                                                                                                                                                                                                                                                                                                                                                     | Need for information about epilepsy, treatment options, and navigating the healthcare system |
| Knowledge  | Heath, 2016, 27371883   | Finally, parents emphasized the importance of receiving adequate information regarding epilepsy surgery, including information presented in a variety of formats (e.g., booklets, photographs, videos). They also suggested that a ‘frequently asked questions’ information sheet would have been beneficial. “I know I got a little booklet about epilepsy surgery services, but it would have been nice for us to have some extra information... just some written up case studies of kids that have gone through, had the same, you know, operation.” | Need for information about epilepsy, treatment options, and navigating the healthcare system |
| Knowledge  | Heath, 2016, 27371883   | These included ...additional information provision                                                                                                                                                                                                                                                                                                                                                                                                                                                                                                       | Need for information about epilepsy, treatment options, and navigating the healthcare system |
| Knowledge  | O'Brien, 2020, 33120326 | [I]t was felt that a greater awareness of potential changes besides seizure control prior to surgery would have been helpful for children and their families in developing realistic expectations and preparing for post-surgical adjustment. They just tell you medical stuff about it, the recovery, not that it'll be different...They just tell you about having no seizures [...] They don't tell you what it's actually going to be like.                                                                                                          | Need for information about epilepsy, treatment options, and navigating the healthcare system |
| Knowledge  | Ozanne, 2016, 27176878  | Sometimes, parents received more information from other parents, than from the physician. They were disappointed if they felt that information was withheld                                                                                                                                                                                                                                                                                                                                                                                              | Need for information about epilepsy, treatment options, and navigating the healthcare system |
| Knowledge  | Ozanne, 2016, 27176878  | Parents thought that it was important to receive the information that surgery was aimed to treat the epilepsy and not other disabilities, such as behavioral problems, in order to have realistic expectations. They emphasized the importance of being informed about both positive and negative outcomes and risks. Even if surgery was a medical success, the family's life situation was                                                                                                                                                             | Need for information about epilepsy, treatment options, and navigating the healthcare system |

| TDF domain               | Author, Year, PMID      | Extracted text <sup>A</sup>                                                                                                                                                                                                                                                                                                                                                                                                                                                                                                                                                                                                                                                                            | Theme                               |
|--------------------------|-------------------------|--------------------------------------------------------------------------------------------------------------------------------------------------------------------------------------------------------------------------------------------------------------------------------------------------------------------------------------------------------------------------------------------------------------------------------------------------------------------------------------------------------------------------------------------------------------------------------------------------------------------------------------------------------------------------------------------------------|-------------------------------------|
|                          |                         | sometimes characterized by sorrow and problems. The deterioration, expected or unexpected, of e.g., motor function, speech, visual field, or attention made life more difficult and burdensome.                                                                                                                                                                                                                                                                                                                                                                                                                                                                                                        |                                     |
| Knowledge                | Baca, 2015, 25894906    | Parents also reported little initial familiarity with epilepsy and that they felt overwhelmed trying to learn a new language of epilepsy because of the "avalanche of information coming at us."                                                                                                                                                                                                                                                                                                                                                                                                                                                                                                       | Overwhelmed by information          |
| Knowledge                | Pieters, 2016, 27521720 | She described the hard and time-consuming struggle of trying to synthesize information on her own "because there really wasn't a lot out there and when you're hearing different things from different specialists it's very difficult for parents to make heads or tails of it". She spent "six months combing through the literature reading everybody's publications from places all over the world ... because I wasn't getting a straight answer ... my husband was saying to me you know are you going to go and get your degree in neuroscience after this ... but you know it's your child, you want to do the best by them and you know you want them to be able to achieve their potential". | Overwhelmed by information          |
| Knowledge                | Baca, 2015, 25894906    | As they acquired more epilepsy knowledge, however, many parents felt more empowered and able to ask questions and participate more effectively in the care of their child                                                                                                                                                                                                                                                                                                                                                                                                                                                                                                                              | Knowledge is empowering             |
| Knowledge                | Baca, 2015, 25894906    | A mother who stated, "I just think knowledge is power and it also brings some comfort to making a good decision," exemplified the sense of empowerment associated with gaining fluency in the language of epilepsy                                                                                                                                                                                                                                                                                                                                                                                                                                                                                     | Knowledge is empowering             |
| Knowledge                | Heath, 2016, 27371883   | Increasing their own knowledge about medically intractable epilepsy and the available treatment options empowered parents to participate more fully in the decision-making process. "I said to him 'don't tell me in a doctor's term, tell it me in a parent's term. I want to know the ins and outs; I want to know exactly what the risks are but in terms that I understand'"                                                                                                                                                                                                                                                                                                                       | Knowledge is empowering             |
| Knowledge                | Pieters, 2016, 27521720 | [P]arents took on the responsibility for learning as exemplified by the parent who naturally 'corrected' her language to imply her understanding of the different terms that clinicians use, "(the seizures) were not controlled ... or intractable as you guys call them."                                                                                                                                                                                                                                                                                                                                                                                                                            | Knowledge is empowering             |
| Knowledge                | Pieters, 2016, 27521720 | Being open to learn and learning itself occurred while parents became epilepsy experts in order to be effective advocates for their children                                                                                                                                                                                                                                                                                                                                                                                                                                                                                                                                                           | Knowledge is empowering             |
| Knowledge                | Pieters, 2016, 27521720 | In order to have productive information exchanges with clinicians and engage in shared decision-making, parents realized that they had to learn about a very unfamiliar and unforeseen situation                                                                                                                                                                                                                                                                                                                                                                                                                                                                                                       | Knowledge is empowering             |
| Knowledge                | Pieters, 2016, 27521720 | The lack of understandable information and the experience of information imbalance between the parent and the physician were overwhelming as experienced by a father who described him and his wife as "pretty pragmatic." He said, "The beginning was terrible, because you're of course dealing with ... specialists in things and that you've pretty much never even heard of .... It was tough in the beginning, really tough ... (the information that we found) was written by doctors for doctors. It's kinda tough when you don't know what you're talking about to get through that.                                                                                                          | Knowledge is empowering             |
| Social role and identity | Heath, 2016, 27371883   | However, they also reported a sense of duty to be "strong" (P1) and "brave" (P3, 4) for their children, wishing to protect them from their feelings of anxiety.                                                                                                                                                                                                                                                                                                                                                                                                                                                                                                                                        | Role and responsibility as a parent |
| Social role and identity | Heath, 2016, 27371883   | Parents discussed feeling pressure from a need to 'do the right thing' by their child; that is, choosing the treatment option that would give their child the best chance of reaching their full potential                                                                                                                                                                                                                                                                                                                                                                                                                                                                                             | Role and responsibility as a parent |

| TDF domain | Author, Year, PMID      | Extracted text <sup>A</sup>                                                                                                                                                                                                                                                                                                                                                                                                                                                                                                                                                                                       | Theme                            |
|------------|-------------------------|-------------------------------------------------------------------------------------------------------------------------------------------------------------------------------------------------------------------------------------------------------------------------------------------------------------------------------------------------------------------------------------------------------------------------------------------------------------------------------------------------------------------------------------------------------------------------------------------------------------------|----------------------------------|
| Emotion    | Baca, 2015, 25894906    | Parents reported personal and family stress throughout the journey. Caring for children with a chronic, severe, and paroxysmal neurologic condition meant being "on call" all the time; they had to be prepared to respond to an emergency at all times                                                                                                                                                                                                                                                                                                                                                           | Drained from managing epilepsy   |
| Emotion    | O'Brien, 2020, 33120326 | Participant descriptions highlighted the significant impact that epilepsy had upon on the child's and family's lives prior to epilepsy surgery. Worries about seizures and the associated risks led to constant fatigue for some: "you're tired yourself before you even go out the door" (Charlie – mother). In some cases, experiences of epilepsy impacted on their lives to such a degree that parents referred to children as "not having a life" (Charlie - mother)                                                                                                                                         | Drained from managing epilepsy   |
| Emotion    | O'Brien, 2020, 33120326 | Child mood and behavioural difficulties-stress, secrecy and shame. Before surgery children's mood and behavioura difficulties were a common, causing fear and stress w hich negatively impacted upon family relationships: "If there w as something there, she w ould get it, she w ould w ant to attack you w ith it". (Jessica – mother) Many described how increased supervision led to a change in their parenting role, negatively impacting on the relationship they or their other children had w ith their child: "I w as just his carer really and didn't have a relationship w ith him" (Jack - mother) | Drained from managing epilepsy   |
| Emotion    | Baca, 2015, 25894906    | Parents frequently described that medication trials continued often w ith little to no mention of surgery. One mother told of her frustrations w ith multiple medications, "It w as, 'Let's work on all the different medical aspects or medicines before going to surgery or even talking about surgery.'"                                                                                                                                                                                                                                                                                                       | Desperate to help their child    |
| Emotion    | Pieters, 2016, 27521720 | Parents felt desperate not only to find a treatment option that w ould work, but also to persevere and actively do something that w as productive and necessary to help their child                                                                                                                                                                                                                                                                                                                                                                                                                               | Desperate to help their child    |
| Emotion    | Pieters, 2016, 27521720 | Wanted to play an active role                                                                                                                                                                                                                                                                                                                                                                                                                                                                                                                                                                                     | Desperate to help their child    |
| Emotion    | Pieters, 2016, 27521720 | [W]anted to use time constructively                                                                                                                                                                                                                                                                                                                                                                                                                                                                                                                                                                               | Desperate to help their child    |
| Emotion    | Pieters, 2016, 27521720 | Another mother remembered that she felt "desperate" to take her adolescent son to another doctor, but she needed to w ait for referrals because of insurance                                                                                                                                                                                                                                                                                                                                                                                                                                                      | Desperate to help their child    |
| Emotion    | Pieters, 2016, 27521720 | [P]arents felt frustrated and desperate to get help for their child.                                                                                                                                                                                                                                                                                                                                                                                                                                                                                                                                              | Desperate to help their child    |
| Emotion    | Heath, 2016, 27371883   | Following indication of surgery as a potential treatment, parents and families faced w hat they described as a "difficult decision" (P5) w hich w as experienced as "daunting", "frightening", "scary", and "stressful"                                                                                                                                                                                                                                                                                                                                                                                           | Difficult and stressful decision |
| Emotion    | Pieters, 2016, 27521720 | "It w as not only in terms of time, it w as mentally draining as w ell. It took a lot of time and it took a lot of concentrated thought to figure this out."                                                                                                                                                                                                                                                                                                                                                                                                                                                      | Difficult and stressful decision |
| Emotion    | Ozanne, 2016, 27176878  | Parents w ere afraid and w orried                                                                                                                                                                                                                                                                                                                                                                                                                                                                                                                                                                                 | Fear (unspecified)               |



| TDF domain | Author, Year, PMID     | Extracted text <sup>A</sup>                                                                                                                                                                                                                                                                                                                                                                                                                                                                                                                                | Theme                                      |
|------------|------------------------|------------------------------------------------------------------------------------------------------------------------------------------------------------------------------------------------------------------------------------------------------------------------------------------------------------------------------------------------------------------------------------------------------------------------------------------------------------------------------------------------------------------------------------------------------------|--------------------------------------------|
| Emotion    | Heath, 2016, 27371883  | Last treatment of choice. For most parents, surgery was a last-resort treatment option that would only be considered following the exhaustion of all other options. This perception was influenced by parental fear regarding the irreversibility of surgery, as well as by professionals who had informed them that surgery was the only remaining treatment for controlling their child's seizures                                                                                                                                                       | Fear of surgery                            |
| Emotion    | Peters, 2016, 27521720 | For the majority of parents, brain surgery was a frightening possibility as described by the mother who said, "At first I was horrified at the thought of this innocent – having her brain opened and operated on. It just seemed so barbaric." Another mother's statement reflected upon her initial feelings of fear and avoidance when she said that she and her husband, "just couldn't deal with (having our daughter go through brain surgery)                                                                                                       | Fear of surgery                            |
| Emotion    | Sylvén, 2020, 32480305 | Parents mentioned the possibility that their child would experience "a change in personality" as a result of the surgery. They did not mention particular personality characteristics but feared that the child's personality would change for the worst                                                                                                                                                                                                                                                                                                   | Fear of surgery                            |
| Emotion    | Sylvén, 2020, 32480305 | Some parents reported that they were concerned that surgery would lead to a loss of function including that language/speech would be negatively affected. This concern included a worry that the child would develop speech difficulties or that they would lose the ability to talk completely as a result of the surgery. Parents also mentioned concerns that their child would acquire motor difficulties or even be paralyzed as a result of the surgery. Parents were also worried that any loss of function would be irreversible after the surgery | Fear of surgery                            |
| Emotion    | Sylvén, 2020, 32480305 | Many parents were worried that their child's epilepsy would be "worse" after the surgery, and as a result, the operation would have been "in vain". This included a risk that seizure frequency might increase, that seizures might be longer or be of a different character, or that seizure frequency might not improve.                                                                                                                                                                                                                                 | Fear of surgery                            |
| Emotion    | Ozanne, 2016, 27176878 | It was demanding not to know if surgery would be possible, and the parents were thankful when the decision was finally made                                                                                                                                                                                                                                                                                                                                                                                                                                | Relief after decision was made             |
| Emotion    | Sylvén, 2020, 32480305 | Many parents described a general hope for improved behavior and emotional functioning for their child. Behavior encompassed a wide variety of outcomes including that the child would be "calmer" with fewer behavioral outbursts, have better attention and concentration, and "feel better"                                                                                                                                                                                                                                                              | Hope for better health and quality of life |
| Emotion    | Sylvén, 2020, 32480305 | Parents hoped that the surgery would lead to better health and quality of life for their child                                                                                                                                                                                                                                                                                                                                                                                                                                                             | Hope for better health and quality of life |
| Emotion    | Sylvén, 2020, 32480305 | Parents often expressed a desire that surgery would result in their child being "more alert", less "tired", and "have more energy". They also mentioned that they hoped that surgery would result in better sleep quality                                                                                                                                                                                                                                                                                                                                  | Hope for better health and quality of life |
| Emotion    | Sylvén, 2020, 32480305 | Some parents mentioned complete freedom from medicine while others mentioned a reduction in AEDs. Parents believed a reduction in AEDs and associated adverse side effects of AEDs including "tiredness" would lead to a "normal life" for their child                                                                                                                                                                                                                                                                                                     | Hope for better health and quality of life |
| Emotion    | Baca, 2015, 25894906   | As parents learned that surgery was a potential viable option for their child, they "hoped" for candidacy                                                                                                                                                                                                                                                                                                                                                                                                                                                  | Hope for surgical candidacy                |
| Emotion    | Heath, 2016, 27371883  | When a decision to accept surgery had been made, parents hoped for the procedure to be carried out as soon as possible. Waiting for a date for surgery was described as an anxious time for parents, who experienced relief when a date was set.                                                                                                                                                                                                                                                                                                           | Hope for surgical candidacy                |

| TDF domain        | Author, Year, PMID      | Extracted text <sup>A</sup>                                                                                                                                                                                                                                                                                                                                                                                                                                                                                                                                                                                       | Theme                                                    |
|-------------------|-------------------------|-------------------------------------------------------------------------------------------------------------------------------------------------------------------------------------------------------------------------------------------------------------------------------------------------------------------------------------------------------------------------------------------------------------------------------------------------------------------------------------------------------------------------------------------------------------------------------------------------------------------|----------------------------------------------------------|
| Social influence  | O'Brien, 2020, 33120326 | This sense of exclusion impacted on the family as a whole, with siblings being unable to attend clubs or invite friends to their house, and parents feeling that they "couldn't join in with what other families were doing" (Lucy – mother). A common theme was parental concern that siblings had less time or attention: as "the focus was on him [child with epilepsy] a lot of the time" (Andrew – mother).                                                                                                                                                                                                  | Social exclusion                                         |
| Social influence  | O'Brien, 2020, 33120326 | Difficulties appeared to be exacerbated by a perceived lack of understanding from others, which appeared to be tied to a notion of epilepsy being an invisible condition, as seizures commonly occurred behind closed doors: "At the beginning, it was just generally at home, they didn't understand, they didn't get it. (Jessica – mother). Most participants described finding it difficult to talk to others about epilepsy, with several reporting that they limited the information they shared, or withholding the diagnosis altogether. "Gosh, we didn't tell anybody. We were ashamed". (Jack – mother) | Social exclusion                                         |
| Social influence  | Heath, 2016, 27371883   | In addition, parents emphasized the importance of accessing the experience and expertise of other parents who had followed a similar treatment pathway. Such peer support was suggested to facilitate understanding of the surgical procedure from a 'parental perspective', as well as provide emotional support. "If people could freely put their experiences on either a forum or even if you get a group, you know, parents talking to other parents who have gone through the experience to get a real idea of what's happening."                                                                           | External support from peers and healthcare professionals |
| Social influences | Heath, 2016, 27371883   | These included ... peer support                                                                                                                                                                                                                                                                                                                                                                                                                                                                                                                                                                                   | External support from peers and healthcare professionals |
| Social influence  | Pieters, 2016, 27521720 | Those parents who were able to connect with other parents and families of children with epilepsy found it to be very helpful to be able to communicate with peers with seizures unresponsive to medication who were on the same journey.                                                                                                                                                                                                                                                                                                                                                                          | External support from peers and healthcare professionals |
| Social influence  | Pieters, 2016, 27521720 | [E]xchanging shared experiences with peers gave direction to decision-making because it helped with processing complex factual and emotional information                                                                                                                                                                                                                                                                                                                                                                                                                                                          | External support from peers and healthcare professionals |
| Social influence  | Pieters, 2016, 27521720 | Three key facilitators were identified as follows: (a) having a champion, (b) finding a good team of epilepsy providers, and (c) connecting with others who shared the experience of epilepsy. (Fig. 1; Table 2). Such facilitators played a key role during the times when parents especially needed support to act purposefully and move out of vulnerable periods.                                                                                                                                                                                                                                             | External support from peers and healthcare professionals |
| Social influence  | Pieters, 2016, 27521720 | However, using time constructively happened after the parents described finding a champion that advocated for them and helped them navigate their journey. It was a champion, whether a doctor, nurse, or social worker, that facilitated steady and purposeful progress over more manageable portions of the journey                                                                                                                                                                                                                                                                                             | External support from peers and healthcare professionals |
| Social influence  | Pieters, 2016, 27521720 | One mother favorably described one such champion, a nurse coordinator, "she's like wonderful for us. She's been our lifesaver." These champions helped parents get referrals and seek different treatment options or were the persons that believed them and pushed them to seek better or additional care. For one mother, her daughter's pediatrician acted as her champion. She said, "He encouraged me and gave me the confidence that if I wasn't happy with what five other pediatric neurologists were saying that it was okay to go and you know continue to seek out other opinions."                    | External support from peers and healthcare professionals |

| TDF domain                 | Author, Year, PMID      | Extracted text <sup>A</sup>                                                                                                                                                                                                                                                                                                                                                                                                                                                                                                                                                                                                                                                                                   | Theme                                                                                                   |
|----------------------------|-------------------------|---------------------------------------------------------------------------------------------------------------------------------------------------------------------------------------------------------------------------------------------------------------------------------------------------------------------------------------------------------------------------------------------------------------------------------------------------------------------------------------------------------------------------------------------------------------------------------------------------------------------------------------------------------------------------------------------------------------|---------------------------------------------------------------------------------------------------------|
| Social influence           | Heath, 2016, 27371883   | Family decisions. Parents described decision-making as a family choice involving partners, siblings, grandparents, and the child (where developmentally appropriate). Discussing treatment options with family members was generally considered to be helpful. "I remember my mother-in-law was in Pakistan and I called her up and I was very teary...I felt like I had been punched in the stomach to be honest 'cause, you know, brain surgery is not something you take lightly and she said 'well if it's for his betterment and to improve his life then we will do whatever it takes'."                                                                                                                | Family decision                                                                                         |
| Social influence           | Heath, 2016, 27371883   | For some families, decision-making regarding surgery gave rise to conflicts. For example, one mother described herself as more agreeable to surgery than the child's father because, as the primary carer, she 'witnessed' the true extent of their child's seizures. In cases where the child's epilepsy was considered to impact on the whole family (e.g., where a parent could not return to work because of a need to look after the child), then, the decision was understood as a responsibility of the whole family                                                                                                                                                                                   | Family decision                                                                                         |
| Belief about consequences  | Baca, 2015, 25894906    | On their journey, many parents transformed their view of surgery from a scary, last resort treatment to a necessary and hopeful option. One mother explained, "By the time she got it—it got so serious I was looking toward that as being an answer to our prayers rather than just something that I couldn't even think about." This transformation occurred as parents became increasingly aware of the severity of their child's epilepsy and its impact on their child's and their future life. Although surgery remained scary, epilepsy was or became scarier than surgery. As some parents feared that their child would die from epilepsy, surgery was no longer perceived as an elective treatment. | Transformation towards surgery as the treatment choice informed by experiences, emotions, and knowledge |
| Beliefs about consequences | Baca, 2015, 25894906    | Many parents initially perceived epilepsy brain surgery to be "pretty horrific" and a treatment of "last resort."                                                                                                                                                                                                                                                                                                                                                                                                                                                                                                                                                                                             | Transformation towards surgery as the treatment choice informed by experiences, emotions, and knowledge |
| Beliefs about consequences | Baca, 2015, 25894906    | After an arduous journey, parents reached the right doctor and center; epilepsy surgery, although previously seen as a last ditch option, became a viable option and a source of hope.                                                                                                                                                                                                                                                                                                                                                                                                                                                                                                                        | Transformation towards surgery as the treatment choice informed by experiences, emotions, and knowledge |
| Beliefs about consequences | Pieters, 2016, 27521720 | After persevering through hard times with unsuccessful medications and interventions, they eventually decided to proceed with surgery, the option that they perceived to be the best treatment for the epilepsy.                                                                                                                                                                                                                                                                                                                                                                                                                                                                                              | Transformation towards surgery as the treatment choice informed by experiences, emotions, and knowledge |
| Beliefs about consequences | Pieters, 2016, 27521720 | Because surgery was viewed as a treatment of last resort for many parents, time was required to process the initial fear, make sense of the emotional information, and consider the factual risks and benefits in order to decide on surgery as the best option for their child. Reflecting on why it took longer than six years to get to surgery for her 9-year-old daughter, a mother said, "Of course you need to take a lot of time to think about it. It's very invasive.... I did as much research as I could about it, and talked to the doctor a lot about it, and I decided that that was her best chance of having a normal life in the future."                                                   | Transformation towards surgery as the treatment choice informed by experiences, emotions, and knowledge |

| TDF domain                 | Author, Year, PMID      | Extracted text <sup>A</sup>                                                                                                                                                                                                                                                                                                                                                                                                                                                                                                                                                                                                                                                                                                                                                                                                                                                                                                                                                                                                                                                                                                                                                                                                                                                                                                                                              | Theme                                                                                                   |
|----------------------------|-------------------------|--------------------------------------------------------------------------------------------------------------------------------------------------------------------------------------------------------------------------------------------------------------------------------------------------------------------------------------------------------------------------------------------------------------------------------------------------------------------------------------------------------------------------------------------------------------------------------------------------------------------------------------------------------------------------------------------------------------------------------------------------------------------------------------------------------------------------------------------------------------------------------------------------------------------------------------------------------------------------------------------------------------------------------------------------------------------------------------------------------------------------------------------------------------------------------------------------------------------------------------------------------------------------------------------------------------------------------------------------------------------------|---------------------------------------------------------------------------------------------------------|
| Beliefs about consequences | Pieters, 2016, 27521720 | Through internal processing, parents worked through the diverse emotions and large amount of information that they were receiving and gathering to move forward and thereby develop a greater understanding of their child's illness and prognosis in order to ultimately reach the point where surgery became the treatment of choice                                                                                                                                                                                                                                                                                                                                                                                                                                                                                                                                                                                                                                                                                                                                                                                                                                                                                                                                                                                                                                   | Transformation towards surgery as the treatment choice informed by experiences, emotions, and knowledge |
| Beliefs about consequences | Heath, 2016, 27371883   | Parents were clear that putting their child forward for epilepsy surgery was the best and right decision for their child, demonstrating a high level of satisfaction with the treatment outcome. However, initial perceptions of surgery were often negative, particularly if it was not a treatment option that had previously been considered or that professionals had indicated. Many parents described attending their child's clinic appointment expecting to talk about more conventional treatments (e.g., medication or diet), leading to them feeling surprised when surgery was raised for discussion. "We went originally to talk about the ketogenic diet and then the doctor said 'oh I think surgery's your best option' which came as a bit of a shock really because no one had ever mentioned the surgery before." (P5) "It actually came as a bit of a surprise to us that option, in that it was mentioned in a review visit, that maybe the time had come to look at the option of surgery but we weren't really aware of that option at that point so it came as quite a shock to us." (P6) While some parents took comfort from the possibility of an additional treatment pathway, others felt excluded from the decision to assess their child for surgical candidacy, leading to their feeling unable to participate in an informed discussion | Transformation towards surgery as the treatment choice informed by experiences, emotions, and knowledge |
| Beliefs about consequences | Heath, 2016, 27371883   | Some parents were unconvinced about the efficacy of surgery for reducing their child's seizures. Skepticism stemmed from their experience of other pharmacological and dietary treatments which had resulted in little improvement in seizure control. In weighing up treatment options, parents also discussed the side effects of alternative treatments. For example, medications were perceived to have a range of adverse side effects, whereas ketogenic diets were viewed as negatively affecting the child's ability to live a 'normal' life. "We thought about the effects of the medication if we chose to continue on the path of finding a different medication... but then how long would that have taken us? Like how long would it work for? Then it would develop, then how long 'til we have to find something else, with all the side-effects that can happen? I didn't want to put her through that as well." (P9)                                                                                                                                                                                                                                                                                                                                                                                                                                    | Balancing potential benefits of surgery with concerns of adverse effects                                |
| Beliefs about consequences | Heath, 2016, 27371883   | Balancing potential costs and benefits. When deliberating surgery, parents balanced their perceived necessity of the treatment in terms of how epilepsy currently affected and would, in the future, affect their child's quality of life, against concerns regarding the possibility of negative outcomes. In other words, parents weighed up the potential benefits of surgery such as freedom from seizures against what they understood as the risks, including cognitive impairments. "There was no quality of life for him; we had to do what was best. We were told of the risks of the surgery and we were told that actually this would be the best thing for him... we don't regret it, but it was, it's not an easy decision to take because you're worried about the risks of things."                                                                                                                                                                                                                                                                                                                                                                                                                                                                                                                                                                       | Balancing potential benefits of surgery with concerns of adverse effects                                |
| Beliefs about consequences | Sylvén, 2020, 32480305  | Some parents mentioned that while they would like seizure freedom, any reduction in seizures would be "welcome" and a clear improvement for their child and for the family in general.                                                                                                                                                                                                                                                                                                                                                                                                                                                                                                                                                                                                                                                                                                                                                                                                                                                                                                                                                                                                                                                                                                                                                                                   | Balancing potential benefits of surgery with concerns of adverse effects                                |
| Beliefs about consequences | Sylvén, 2020, 32480305  | Some parents mentioned complete freedom from medicine while others mentioned a reduction in AEDs. Parents believed a reduction in AEDs and associated adverse side effects of AEDs including "tiredness" would lead to a "normal life" for their child.                                                                                                                                                                                                                                                                                                                                                                                                                                                                                                                                                                                                                                                                                                                                                                                                                                                                                                                                                                                                                                                                                                                  | Balancing potential benefits of surgery with concerns of adverse effects                                |

| TDF domain                 | Author, Year, PMID     | Extracted text <sup>A</sup>                                                                                                                                                                                                                                                                                                                                                                                                                                                                                                                                                          | Theme                                                                    |
|----------------------------|------------------------|--------------------------------------------------------------------------------------------------------------------------------------------------------------------------------------------------------------------------------------------------------------------------------------------------------------------------------------------------------------------------------------------------------------------------------------------------------------------------------------------------------------------------------------------------------------------------------------|--------------------------------------------------------------------------|
| Beliefs about consequences | Sylvén, 2020, 32480305 | Many parents mentioned a desire for seizure freedom for their child after surgery. They wanted their child to be free from the “trouble” of seizures and everything that follows from seizures                                                                                                                                                                                                                                                                                                                                                                                       | Balancing potential benefits of surgery with concerns of adverse effects |
| Beliefs about consequences | Sylvén, 2020, 32480305 | They wanted that their child could do everything their friends could do like “play football, cycle, and swim independently”. Some parents mentioned that they wanted their child to be able to go back to school and have a “proper social life” while some parents referenced the future hoping that the child would be better placed to get a job and driving license as a result of surgery.                                                                                                                                                                                      | Balancing potential benefits of surgery with concerns of adverse effects |
| Beliefs about consequences | Sylvén, 2020, 32480305 | Parents mentioned the possibility that their child would experience “a change in personality” as a result of the surgery. They did not mention particular personality characteristics but feared that the child's personality would change for the worst                                                                                                                                                                                                                                                                                                                             | Balancing potential benefits of surgery with concerns of adverse effects |
| Beliefs about consequences | Sylvén, 2020, 32480305 | Some parents reported that they were concerned that surgery would lead to a loss of function including that language/speech would be negatively affected. This concern included a worry that the child would develop speech difficulties or that they would lose the ability to talk completely as a result of the surgery. Parents also mentioned concerns that their child would acquire motor difficulties or even be paralyzed as a result of the surgery. Parents were also worried that any loss of function would be irreversible after the surgery                           | Balancing potential benefits of surgery with concerns of adverse effects |
| Beliefs about consequences | Sylvén, 2020, 32480305 | The majority of parents mentioned concerns about possible complications that could occur during or soon after the surgical procedure                                                                                                                                                                                                                                                                                                                                                                                                                                                 | Balancing potential benefits of surgery with concerns of adverse effects |
| Beliefs about consequences | Sylvén, 2020, 32480305 | A small number of parents said that they had no concerns before the surgery. One parent said that they were not worried as “no concerns arose in the discussions with professionals” before the surgery                                                                                                                                                                                                                                                                                                                                                                              | Balancing potential benefits of surgery with concerns of adverse effects |
| Beliefs about consequences | Sylvén, 2020, 32480305 | The results of the current study suggest that parents frequently worry about that the child would lose skills or function, or complications would arise during surgery that could result in injury.                                                                                                                                                                                                                                                                                                                                                                                  | Balancing potential benefits of surgery with concerns of adverse effects |
| Beliefs about consequences | Heath, 2016, 27371883  | For all parents in this study, the perceived need of surgery outweighed the possible risks and side effects. “We thought this is going to be no life for him... He was on this diet which meant he couldn't go out with friends; he couldn't stay at friends' houses, all the things that other kids do, he couldn't do... and then he got these fits virtually every night and we thought... you know what, there is no decision to make, we gotta do it... We knew there were risks, we talked about them with [child] and he was frightened but he said no, we gotta do it.” (P3) | Only choice left                                                         |
| Beliefs about consequences | Heath, 2016, 27371883  | Last treatment of choice. For most parents, surgery was a last-resort treatment option that would only be considered following the exhaustion of all other options...Some parents felt that they had little alternative but to accept surgical intervention in order to provide their child with the best possible chance of improving their quality of life. “We felt it was our only option really in her having a more independent future.”                                                                                                                                       | Only choice left                                                         |
| Beliefs about consequences | Heath, 2016, 27371883  | “My husband and I walked out of the appointment saying we feel like we don't have a choice... we felt like it was the only choice we could make.”                                                                                                                                                                                                                                                                                                                                                                                                                                    | Only choice left                                                         |

| TDF domain                          | Author, Year, PMID      | Extracted text <sup>A</sup>                                                                                                                                                                                                                                                                                                                                                                                                                                                                                                                                                                                            | Theme                                            |
|-------------------------------------|-------------------------|------------------------------------------------------------------------------------------------------------------------------------------------------------------------------------------------------------------------------------------------------------------------------------------------------------------------------------------------------------------------------------------------------------------------------------------------------------------------------------------------------------------------------------------------------------------------------------------------------------------------|--------------------------------------------------|
| Beliefs about consequences          | Heath, 2016, 27371883   | For one family with an adolescent child, it was considered necessary to accept surgery while the child received care from the children's hospital as they believed that the treatment would become unavailable once transitioned to adult services.                                                                                                                                                                                                                                                                                                                                                                    | Only choice left                                 |
| Beliefs about consequences          | O'Brien, 2020, 33120326 | Parents described a process of weighing up the pros and cons based on the information provided by the medical team, which led to the decision to pursue surgery. Many perceived that surgery was the only hope "a simple decision" (Alex – mother), they were "in no doubt" (Lucy – mother) and that they "had no choice" (Jessica mother) as the health and wellbeing of their child would deteriorate or become more serious if surgery was not pursued. There was also a sense of 'not knowing' outcomes if surgery was not pursued. We felt we've got to do this because where is she going to end up if we don't? | Only choice left                                 |
| Beliefs about consequences          | O'Brien, 2020, 33120326 | Decision making – is there a choice? When asked what informed the decision-making process when considering the option of surgery as a treatment for epilepsy, parents discussed how the perceived risks to their child's safety, as well as the safety of others, were key factors. Even with all the risks, it wasn't going to be much worse than having a little girl that was unconscious all the time anyway.                                                                                                                                                                                                      | Only choice left                                 |
| Beliefs about consequences          | Ozanne, 2016, 27176878  | Parents felt that epilepsy surgery was a question of life or death, of chaos or control. It was terrifying to see the child so ill. The epilepsy was uncontrolled, and drugs gave side effects. Parents felt that there was no alternative to surgery. However, it was a difficult decision since they did not know the outcome.                                                                                                                                                                                                                                                                                       | Only choice left                                 |
| Beliefs about consequences          | Ozanne, 2016, 27176878  | Information about possible complications related to surgery did not prevent the parents from wishing to proceed with the operation. They preferred to take a risk rather than live in constant fear                                                                                                                                                                                                                                                                                                                                                                                                                    | Only choice left                                 |
| Environmental context and resources | Baca, 2015, 25894906    | The journey to finding the right doctor was further complicated by parental perceptions that doctors sometimes lacked knowledge of or familiarity with epilepsy. Many parents went to numerous doctors searching for the "right" doctor, or one who had a strong epilepsy knowledge base, could effectively identify the problem, and then make a clear plan of action                                                                                                                                                                                                                                                 | Challenges with navigating the healthcare system |
| Environmental context and resources | Baca, 2015, 25894906    | Parents expressed that their children were seen, evaluated, and cared for by a variety of doctors of different specialties throughout their journey. Parents frequently described difficulty finding the "right" doctor(s). Difficulty was associated with a lack of pediatric neurologists in their local area and with different doctors having different recommendations.                                                                                                                                                                                                                                           | Challenges with navigating the healthcare system |
| Environmental context and resources | Baca, 2015, 25894906    | Parents depicted a pathway filled with multiple doctors and treatments, insurance battles, and work and life obstacles as they sought a cure for their child's seizures, becoming ever more knowledgeable about epilepsy                                                                                                                                                                                                                                                                                                                                                                                               | Challenges with navigating the healthcare system |
| Environmental context and resources | Pieters, 2016, 27521720 | Further, finding the best clinicians for the needs of their child required an understanding of the relationship between different medical (sub)-specialties and thereby represented dual and concurrent use of processing and navigating mechanisms                                                                                                                                                                                                                                                                                                                                                                    | Challenges with navigating the healthcare system |
| Environmental context and resources | Pieters, 2016, 27521720 | The second mechanism, navigating, was when the parents kept and directed their way along their journey often through uncharted territory as they steered through various aspects of the healthcare system and learned about epilepsy itself and its various treatments.                                                                                                                                                                                                                                                                                                                                                | Challenges with navigating the healthcare system |

| TDF domain                          | Author, Year, PMID      | Extracted text <sup>A</sup>                                                                                                                                                                                                                                                                                                                                                                                                                                                                                                                                                                | Theme                                            |
|-------------------------------------|-------------------------|--------------------------------------------------------------------------------------------------------------------------------------------------------------------------------------------------------------------------------------------------------------------------------------------------------------------------------------------------------------------------------------------------------------------------------------------------------------------------------------------------------------------------------------------------------------------------------------------|--------------------------------------------------|
| Environmental context and resources | Pieters, 2016, 27521720 | A mother described her disappointment with being denied by insurance despite doing all the work that was required                                                                                                                                                                                                                                                                                                                                                                                                                                                                          | Challenges with navigating the healthcare system |
| Environmental context and resources | Pieters, 2016, 27521720 | "We'd already been fighting her seizures for two and a half, approaching three years, and because we were new there and per protocol, they wanted to try these other treatments for another year."                                                                                                                                                                                                                                                                                                                                                                                         | Challenges with navigating the healthcare system |
| Environmental context and resources | Ozanne, 2016, 27176878  | The Swedish Social Insurance Agency, technical aids center, school, and municipality were criticized by the parents. Based on their experience, they felt that the bureaucracy had been problematic and had taken a great deal of time. They had to fight for their rights, despite physicians' certificates. Without specific diagnoses of comorbidities, it was even more difficult to get adequate support. They thought that it would be helpful if the authorities understood that parents only asked for help when they had reached their limit, and then, urgent help was necessary | Challenges with navigating the healthcare system |
| Environmental context and resources | Ozanne, 2016, 27176878  | Parents were disappointed if it took a long time to get a correct diagnosis                                                                                                                                                                                                                                                                                                                                                                                                                                                                                                                | Challenges with navigating the healthcare system |
| Environmental context and resources | Baca, 2015, 25894906    | Several parents experienced feeling doubted by a doctor; some were told that nothing was wrong with their child initially                                                                                                                                                                                                                                                                                                                                                                                                                                                                  | Interactions with providers (barriers)           |
| Environmental context and resources | Baca, 2015, 25894906    | As parents learned that surgery was a potential viable option for their child, they "hoped" for candidacy. This hoping required persistence and sometimes disregarding doctors who initially felt surgery was not an option. Looking back, one father voiced happiness that he listened to his parental instincts rather than the opinion of one doctor. He (doctor) said, "I don't believe that she is a surgical candidate.' As a parent, I listened and I wanted to think otherwise.... In hindsight, I'm glad I didn't listen to him."                                                 | Interactions with providers (barriers)           |
| Environmental context and resources | Baca, 2015, 25894906    | Parents also reported notable physician-based barriers including variability in perceived knowledge of epilepsy, criteria for presurgical referral and appropriateness of epilepsy surgery                                                                                                                                                                                                                                                                                                                                                                                                 | Interactions with providers (barriers)           |
| Environmental context and resources | Pieters, 2016, 27521720 | [C]rossing such an information divide was an uphill battle as stated by a mother who described feeling dismissed by doctors until she found someone who was approachable and was "gracious enough to talk to a mere mortal mother on the phone ... because a lot of docs won't, they've got lots of protective armor around them shielding off potential patients or worse yet parents."                                                                                                                                                                                                   | Interactions with providers (barriers)           |
| Environmental context and resources | Heath, 2016, 27371883   | Parents perceived a lack of control over the decision-making process through their limited involvement in initial discussions regarding surgical candidacy                                                                                                                                                                                                                                                                                                                                                                                                                                 | Interactions with providers (barriers)           |
| Environmental context and resources | Heath, 2016, 27371883   | These included earlier and softer introduction of surgery as a possible treatment option                                                                                                                                                                                                                                                                                                                                                                                                                                                                                                   | Interactions with providers (barriers)           |
| Environmental context and resources | Ozanne, 2016, 27176878  | During the long hospitalizations, some parents felt that nobody had time for them. Arrogance of some professionals made them very disappointed                                                                                                                                                                                                                                                                                                                                                                                                                                             | Interactions with providers (barriers)           |

| TDF domain                          | Author, Year, PMID      | Extracted text <sup>A</sup>                                                                                                                                                                                                                                                                                                                                                                 | Theme                                      |
|-------------------------------------|-------------------------|---------------------------------------------------------------------------------------------------------------------------------------------------------------------------------------------------------------------------------------------------------------------------------------------------------------------------------------------------------------------------------------------|--------------------------------------------|
| Environmental context and resources | Ozanne, 2016, 27176878  | If the pediatric neurologists revealed their own worries and insecurities regarding epilepsy surgery, this could have negative effects                                                                                                                                                                                                                                                      | Interactions with providers (barriers)     |
| Environmental context and resources | Ozanne, 2016, 27176878  | Parents described that support and information were inadequate before the epilepsy was recognized to be drug-resistant, especially from the local hospital. Their concerns were not taken seriously                                                                                                                                                                                         | Interactions with providers (barriers)     |
| Environmental context and resources | Ozanne, 2016, 27176878  | The support and information went from poor to strong when specialists at the university hospitals were involved                                                                                                                                                                                                                                                                             | Interactions with providers (facilitators) |
| Environmental context and resources | Ozanne, 2016, 27176878  | The pediatric neurologist's worry and sympathy for the family could also strengthen them since they felt invited and could be insecure together                                                                                                                                                                                                                                             | Interactions with providers (facilitators) |
| Environmental context and resources | Ozanne, 2016, 27176878  | Trust and safety characterized the relations to the pediatric neurologists and specialist nurses. It strengthened parents' trust to see that the pediatric neurologist fought for the child and that the parents' opinions counted in the decision process. Parents appreciated continuous contact.                                                                                         | Interactions with providers (facilitators) |
| Environmental context and resources | Pieters, 2016, 27521720 | Trust in the information that they received was greater when their child was in the hands of a team with different expertise, as exemplified by the mother who said, "They get all the doctors together to look at all the information ... that felt a lot more helpful because if we were at a different hospital and you only had the one doctor, then they would have misdiagnosed him." | Interactions with providers (facilitators) |
| Environmental context and resources | Pieters, 2016, 27521720 | When parents finally reached a comprehensive center to seek evaluation for potential pediatric epilepsy surgery, they recognized the importance of having a medical team of experts                                                                                                                                                                                                         | Interactions with providers (facilitators) |

<sup>A</sup>Study participant (first order statement) or study author (second order statement). We kept original spelling from primary study.



# BMJ Open

## Parent perceptions and decision-making about treatments for epilepsy: A qualitative evidence synthesis

|                                 |                                                                                                                                                                                                                                                                                                                                                                     |
|---------------------------------|---------------------------------------------------------------------------------------------------------------------------------------------------------------------------------------------------------------------------------------------------------------------------------------------------------------------------------------------------------------------|
| Journal:                        | <i>BMJ Open</i>                                                                                                                                                                                                                                                                                                                                                     |
| Manuscript ID                   | bmjopen-2022-066872.R1                                                                                                                                                                                                                                                                                                                                              |
| Article Type:                   | Original research                                                                                                                                                                                                                                                                                                                                                   |
| Date Submitted by the Author:   | 08-Nov-2022                                                                                                                                                                                                                                                                                                                                                         |
| Complete List of Authors:       | Uhl, Stacey; ECRI, Center for Clinical Evidence<br>Konnyu, Kristin; Brown University School of Public Health, Center for Evidence Synthesis<br>Wilson, Renee; Johns Hopkins University, School of Public Health<br>Adam, Gaelen; Brown University,<br>Robinson, Karen; Johns Hopkins University, School of Public Health<br>Viswanathan, Meera ; RTI International, |
| <b>Primary Subject Heading</b>: | Neurology                                                                                                                                                                                                                                                                                                                                                           |
| Secondary Subject Heading:      | Qualitative research                                                                                                                                                                                                                                                                                                                                                |
| Keywords:                       | QUALITATIVE RESEARCH, Epilepsy < NEUROLOGY, NEUROSURGERY, Paediatric neurology < PAEDIATRICS                                                                                                                                                                                                                                                                        |
|                                 |                                                                                                                                                                                                                                                                                                                                                                     |

SCHOLARONE™  
Manuscripts



I, the Submitting Author has the right to grant and does grant on behalf of all authors of the Work (as defined in the below author licence), an exclusive licence and/or a non-exclusive licence for contributions from authors who are: i) UK Crown employees; ii) where BMJ has agreed a CC-BY licence shall apply, and/or iii) in accordance with the terms applicable for US Federal Government officers or employees acting as part of their official duties; on a worldwide, perpetual, irrevocable, royalty-free basis to BMJ Publishing Group Ltd ("BMJ") its licensees and where the relevant Journal is co-owned by BMJ to the co-owners of the Journal, to publish the Work in this journal and any other BMJ products and to exploit all rights, as set out in our [licence](#).

The Submitting Author accepts and understands that any supply made under these terms is made by BMJ to the Submitting Author unless you are acting as an employee on behalf of your employer or a postgraduate student of an affiliated institution which is paying any applicable article publishing charge ("APC") for Open Access articles. Where the Submitting Author wishes to make the Work available on an Open Access basis (and intends to pay the relevant APC), the terms of reuse of such Open Access shall be governed by a Creative Commons licence – details of these licences and which [Creative Commons](#) licence will apply to this Work are set out in our licence referred to above.

Other than as permitted in any relevant BMJ Author's Self Archiving Policies, I confirm this Work has not been accepted for publication elsewhere, is not being considered for publication elsewhere and does not duplicate material already published. I confirm all authors consent to publication of this Work and authorise the granting of this licence.

**TITLE:**

**Parent perceptions and decision-making about treatments for epilepsy: A qualitative evidence synthesis**

**AUTHORS**

Stacey Uhl, MS<sup>a</sup>; Kristin J. Konnyu, PhD<sup>b</sup>; Renee Wilson, MS<sup>c</sup>; Gaelen P. Adam<sup>b</sup>, MLIS MPH; Karen A. Robinson, PhD<sup>d</sup>; Meera Viswanathan, PhD<sup>e</sup>

Stacey Uhl and Kristin Konnyu contributed equally to the writing of this manuscript

Corresponding author: Stacey Uhl, suhl@ecri.org

Word count: 4159 (159 over)

<sup>a</sup> Center for Clinical Evidence and Guidelines  
ECRI  
Plymouth Meeting, PA, USA

<sup>b</sup> Center for Evidence Synthesis in Health  
Department of Health Services, Policy, and Practice  
Brown University School of Public Health  
Providence, Rhode Island, USA

<sup>c</sup> Department of Health Policy and Management  
School of Public Health  
Johns Hopkins University  
Baltimore, MD, USA

<sup>d</sup> Department of Medicine  
Johns Hopkins University School of Medicine  
Baltimore, MD. USA

<sup>e</sup> Evidence-based Practice Center  
RTI International–University of North Carolina at Chapel Hill  
Chapel Hill, NC, USA

## Abstract

**Objectives** Epilepsy treatment decision-making is complex, and understanding what informs caregiver decision making about treatment for childhood epilepsy is crucial to better support caregivers and their children. We synthesized evidence on caregivers' perspectives and experiences of treatments for childhood epilepsy.

**Design** Systematic review of qualitative studies using a best-fit framework and Grading of Recommendations Assessment, Development, and Evaluation Confidence in the Evidence from Reviews of Qualitative Research (GRADE-CERQual) approach.

**Data sources** Searched Embase, PubMed, CINAHL, PsycINFO, SocINDEX, and Web of Science from January 1, 1999, to August 19, 2021.

**Eligibility criteria** We included qualitative studies examining caregiver's perspectives on anti-seizure medication, diet, or surgical treatments for childhood epilepsy. We excluded studies not reported in English.

**Data extraction and synthesis** We extracted qualitative evidence into one of 14 domains defined by the Theoretical Domains Framework (TDF). One reviewer extracted study data and methodological characteristics, and two reviewers extracted qualitative findings. The team verified all extractions. We identified themes within TDF domains and synthesized summary statements of these themes. We assessed our confidence in our summary statements using GRADE-CERQual.

**Results** We identified 5 studies (in 6 reports) of good methodological quality focused on parent perceptions of neurosurgery; we found limited indirect evidence on parents' perceptions of medications or diet. We identified themes within six of the 14 TDF domains relevant to treatment decisions: knowledge, emotion; social/professional role and identity; social influence; beliefs about consequences; and environmental context and resources.

**Conclusions** Parents of children with epilepsy navigate a complex process to decide whether to have their child undergo surgery. Educational resources, peer support, and patient navigators may help support parents through this process. More qualitative studies are needed on non-surgical treatments for epilepsy and among caregivers from different cultural and socio-economic backgrounds to fully understand the diversity of perspectives that informs treatment decision-making.

## Strengths and limitations of this study

- This synthesis followed contemporary standards for the conduct of qualitative synthesis, which includes using a best-fit framework approach to categorize and synthesize findings based on the Theoretical Domains Framework (TDF).
- Risks to rigor of included studies were assessed using the Critical Appraisal Skills Programme (CASP) tool for qualitative studies.
- Confidence in the conclusions drawn from this synthesis was rated using the Grading of Recommendations Assessment, Development, and Evaluation Confidence in the Evidence from Reviews of Qualitative Research (GRADE CERQual).
- As with all qualitative synthesis, selecting which data to extract and how to code it is ultimately a subjective process.
- Limited to studies that examined parents' perceptions, experiences, and decision-making about pursuing surgery to treat their child's epilepsy.

1  
2  
3 **Word: 4,219**  
4

## 5 **Introduction**

6  
7 Epilepsy is a common neurologic disorder in children, affecting about 1% of children in the  
8 United States.<sup>1</sup> While there are different types of childhood epilepsy, each type involves  
9 recurring seizures caused by abnormal electrical activity in the brain. Epilepsy is categorized by  
10 seizure type (e.g., focal, generalized, or unknown), epilepsy type (e.g., focal, generalized,  
11 unknown), and syndrome type (e.g., childhood absence epilepsy, Dravet syndrome).<sup>2-4</sup> No matter  
12 the type, epilepsy is a chaotic and unpredictable condition for both the affected children and their  
13 caregivers.<sup>5</sup>

14  
15 Treatment and ongoing management approaches depend on the type of the epilepsy and prior  
16 treatment response. Treatment options for childhood epilepsy include anti-seizure medications  
17 (ASMs), ketogenic diets, or surgery. Although many children with new-onset epilepsy achieve  
18 seizure freedom with ASMs,<sup>6</sup> these drugs are associated with numerous adverse effects (e.g.,  
19 tiredness, nausea, headache, difficulty concentrating, depression, and suicidal ideation).<sup>7</sup>  
20 Furthermore, about 20% of children continue to experience seizures despite drug treatment.<sup>8</sup> The  
21 effectiveness of ketogenic diets (e.g., Atkins diet) is supported by low quality evidence.<sup>9</sup>  
22 However, these diets are also associated with adverse effects (e.g., gastrointestinal symptoms,  
23 dyslipidemia, decreased growth, and kidney stones), and require considerable caregiver effort to  
24 maintain. Surgical interventions may isolate and remove the underlying neurological cause of  
25 seizures, but carry risks of bleeding, infection, hydrocephalus, and new neurologic deficits.

26  
27 Epilepsy treatment decision-making is thus complex and needs to consider each child's  
28 unique form of epilepsy, evidence of each treatment's potential benefits and harms, previous or  
29 ongoing experiences with treatment(s), and family's values and preferences. Although studies of  
30 treatment effectiveness rarely explore how families navigate these complex considerations or  
31 how these considerations may evolve over time, qualitative studies can offer context on caregiver  
32 experiences and decision-making. Syntheses of these qualitative studies can help shape caregiver  
33 and healthcare provider interactions and inform shared decision-making tools and processes. The  
34 purpose of this review is to summarize the qualitative research regarding caregivers' perspectives  
35 and experiences of treatments for childhood epilepsy.  
36  
37  
38

## 39 **Methods**

40  
41 We conducted a qualitative evidence synthesis in accordance with standards for qualitative  
42 evidence syntheses.<sup>10-12</sup> Patients or the public were not involved in the design, conduct,  
43 reporting, or dissemination of our synthesis.  
44

### 45 **Data Sources and Searches**

46 We searched EMBASE, PubMed (in process), CINAHL, PsycINFO, SocINDEX, and Web  
47 of Science for studies published from January 1, 1999, to August 19, 2021 using terms related to  
48 epilepsy, treatments, and caregiver perspectives (Appendix A). The search was limited to  
49 English-language. We also ran forward and backward citation searches (i.e., snowball searching)  
50 on included studies to ensure relevant studies were not missed.  
51

### 52 **Study Selection**

53 We included qualitative studies that sought to understand caregiver's perspectives on ASMs,  
54 diet, or surgical treatments for childhood epilepsy. Studies needed to use qualitative methods for  
55 both data collection (e.g., focus group, individual interviews, or open-ended survey questions)  
56  
57

1  
2  
3 and data analysis (e.g., thematic analysis). We excluded studies that focused only on non-  
4 caregiver perceptions (e.g., patient or healthcare provider) or that focused only on caregiver  
5 stress or caregiver expectations of treatment. We did not restrict by study country or care setting.

6 One reviewer screened titles and abstracts of citations retrieved from searches for eligibility.  
7 Two independent reviewers screened the full text of potentially relevant citations in PICO  
8 Portal<sup>®</sup> (<https://picoportal.org/>). Disagreements were resolved through discussion of the full  
9 team.  
10

### 11 **Data Extraction and Quality Assessment**

12 For each study, we extracted details on the study design and methodological features,  
13 population characteristics, and qualitative analysis findings.

14 One reviewer assessed risks to rigor using the Critical Appraisal Skills Programme (CASP)  
15 tool for qualitative studies, which appraises research aims, congruence between research aims  
16 and methodological approach, quality of sampling and data collection, appropriateness of  
17 application of methods, richness and conceptual depth of findings, appropriateness of  
18 interrogation of findings, and researcher reflexivity.<sup>13</sup> All team members reviewed the CASP  
19 assessments to ensure consistency of ratings across studies.  
20

21 Two team members independently extracted and coded the qualitative findings of the  
22 included studies in MaxQDA<sup>®</sup> 2020 (Berlin, Germany), an online platform designed to support  
23 qualitative data management, extraction, and analysis. The extracted data included direct quotes  
24 from the participants (first order statements) and summary statements written by the study  
25 authors (second order statements). Extracted data were imported into spreadsheets to facilitate  
26 data cleaning, confirmation of themes, and synthesis.  
27

28 To categorize the extracted data, we used the Theoretical Domains Framework (TDF),<sup>14, 15</sup>  
29 which was developed to assist in identifying the cognitive, affective, social, and environmental  
30 factors that may influence an individuals' performance of a health behavior. The health behavior  
31 of interest for this review was the decision to pursue an epileptic treatment. The 14 domains  
32 include: knowledge; skills; social/professional role and identity; belief about capabilities;  
33 optimism; beliefs about consequences; reinforcement; intention; goals; memory, attention, and  
34 decision processes; environmental context and resources; social influences; emotion and  
35 behavioral regulation (Appendix B). A third reviewer confirmed TDF domain codes and the  
36 team discussed the coding to ensure accuracy and consistency both within and across TDF  
37 domains. One reviewer did a final confirmation of extracted text and coding to ensure no data  
38 were missed and that there was consistency across domains.  
39

### 40 **Data synthesis and analysis**

41 We adopted a best-fit framework approach to guide our qualitative synthesis. In this  
42 approach, data are coded according to TDF domains. One reviewer then summarized key themes  
43 within each TDF domain. Themes were discussed and debated among the team until consensus  
44 was achieved. We used the finalized themes to develop summary statements and assessed our  
45 confidence in these statements using Grading of Recommendations Assessment, Development,  
46 and Evaluation Confidence in the Evidence from Reviews of Qualitative Research (GRADE-  
47 CERQual).<sup>16-18</sup> We rated our confidence in the summary statements as either high, moderate,  
48 low, or very low based on our assessment of the four GRADE-CERQual domains:  
49 methodological limitations, relevance, coherence, and adequacy of the data (Appendix C for  
50 definition of domains). "High confidence" refers to a finding that is highly likely to be a  
51 reasonable representation of the phenomenon of interest, whereas "very low confidence" refers  
52 to a review finding in which it was unclear if the finding was a reasonable representation.  
53  
54  
55  
56  
57

**Patient and public involvement:** Patients or the public were not involved in the design, or conduct, or reporting, or dissemination plans of our research.

## Results

The literature search yielded 1,447 citations from searches (see PRISMA flow diagram, Figure 1). We found 66 citations to retrieve for full-text screening of which five studies (in six publications) were included in the final sample.<sup>19-24</sup> Table 1 presents characteristics of included studies.

All studies examined parents' perceptions, experiences, and decision-making leading to surgery. All studies were conducted after the children had undergone surgery, with one study also surveying parents "just prior" to surgery.<sup>24</sup> Three studies reported data on parents' perceptions and experiences with medications and diet, but only in the context of selecting surgery (e.g., parents considering surgery due to the undesirable side effects or uncontrolled epilepsy with prior treatments).<sup>19, 21, 24</sup> In total, the views of 186 parents are represented in the five studies (the majority of whom were mothers, n=115). The time from children's surgery to data collection ranged from 6 months to 10 years among the three studies reporting on timing. Four studies collected parent perspectives through semi-structured interviews conducted in-person or over the telephone (length ranging from 10 to 75 minutes),<sup>19-23</sup> and one study captured parent perceptions through open-ended survey questions.<sup>24</sup>

All studies were assessed to have minor risk to rigor (Appendix D) due to the retrospective nature of recruitment and the lack of consideration (or reporting) of the relationship between researchers and participants. Otherwise, studies were considered appropriate in their use of qualitative design, methods of data collection, and analysis. The retrospective nature of the included studies raises concerns about recall bias, as surgical outcomes may have affected retrospective perceptions, and selection bias since studies only included parents of children who were referred to surgery and proceeded with surgery (and possibly experienced some level of success with surgery). All but one study<sup>23</sup> did not report whether interviewers were part of the child's care team, which may have influenced responses. Ozanne et al. reported that the researchers that interviewed parents and analyzed the data were not part of the epilepsy surgery team.<sup>23</sup>

We identified and coded data for six of the 14 TDF domains: knowledge; emotion; social/professional role and identity; social influence; beliefs about consequences; and environmental context and resources (Figure 2). We did not find evidence from extracted qualitative data for the remaining eight TDF domains. Appendix E provides the extracted text from studies linked to their synthesized themes.

The GRADE-CERQual table (Table 2) summarizes findings and conclusions for each TDF domain. We had no or minor concerns with the coherence of the findings (i.e., the synthesized findings reflects the complexity and variation of the data) or their relevance (i.e., the extent to which synthesized findings are applicable to the context specified in the review question). We had minor or moderate concerns with the adequacy (i.e., the degree of richness and quantity of the data supporting the synthesized finding) of the findings related to knowledge and environmental context and resources, respectively. Below, we report the summary statement (and associated GRADE-CERQual level of confidence) under each identified TDF domain, and summarize the key themes that contributed to the statements.

### TDF Domain 1: Knowledge



1  
2  
3  
4 **Summary statement:** *Evidence from four studies indicated that caregivers value*  
5 *information about epilepsy, its treatment options, and navigating the healthcare system to access*  
6 *timely and effective treatment for their child. Despite feeling overwhelmed by the complexity and*  
7 *sometimes contradictory information, caregivers value learning this new language so they can*  
8 *become better advocates for their child (Moderate confidence)*<sup>19-23</sup>

9 Once parents recognized “something [was] wrong” with the health of their child, they sought  
10 information from multiple sources “to understand seizures and epilepsy and become better  
11 advocates for their child.”<sup>19</sup> Parents wanted information about medications,<sup>19</sup> surgery,<sup>19, 21</sup> and  
12 what types of doctors were needed to care for their child.<sup>20</sup> They also noted needing to learn  
13 about how to navigate the health system including multiple specialties, hospitals, and insurance  
14 procedures.<sup>19</sup>

15  
16 Parents often perceived the information they received from professionals as inadequate to  
17 make informed decisions.<sup>21</sup> They described seeking lay language information from multiple  
18 sources, including additional professionals, the internet, books, family, friends, and other  
19 parents.<sup>19, 23</sup> Parents expressed discomfort in the “lack of understandable information” and  
20 “information imbalance” between themselves and their child’s providers and sought to become  
21 “epilepsy experts in order to be effective advocates for their children.”<sup>20</sup> After increasing their  
22 knowledge, parents felt more empowered to ask questions and participate more actively in the  
23 decision-making.<sup>19, 21</sup> Parents thus described active learning to ensure productive information  
24 exchanges with providers (including using clinical terms) to support a positive shared-decision  
25 making process.<sup>20</sup>

## 26 27 28 **TDF Domain 2: Social role and identity**

29 **Summary statement:** *Evidence from one study indicated that caregivers feel a sense of*  
30 *duty and need to do the right thing in selecting a treatment for their child (Moderate*  
31 *confidence).*<sup>21</sup>

32 Parents reported a “sense of duty” to be “strong” and “brave.” They also reported feeling  
33 pressure to “do the right thing” by their child; that is, choosing the treatment option that would  
34 give their child the best chance of “reaching their full potential.”<sup>21</sup>

## 35 36 37 **TDF Domain 3: Emotion**

38 **Summary statement:** *Five studies provided evidence to suggest that caregivers*  
39 *experience the journey of navigating their child’s epilepsy and ultimately selecting surgical*  
40 *treatment as an emotionally fraught one with emotions ranging from exhaustion, desperation,*  
41 *fear to relief, and hope (Moderate confidence).*<sup>19-23</sup>

42 Parents expressed feeling drained and stressed from always being “on call,”<sup>19</sup> worrying  
43 about a seizure,<sup>19, 22</sup> or mood and behavioral difficulties.<sup>22</sup> Parents recalled feeling frustrated<sup>19, 20</sup>  
44 and desperate to “find a treatment option that would work.”<sup>20</sup> For example, one mother was  
45 frustrated that her child’s provider continued to perform medication trials to manage seizures and  
46 not discuss surgery as an option,<sup>19</sup> while another mother was desperate to get her son to another  
47 doctor but needed to wait for referrals because of insurance.

48  
49 When considering surgery as a potential treatment option, parents reported the decision  
50 process as “difficult,” “frightening,” and “stressful.”<sup>20, 21</sup> Parents feared surgery would lead to  
51 worse health outcomes for their child,<sup>21, 24</sup> change their child’s personality, or cause a loss of  
52 function (e.g., partial or complete loss in speech or movement).<sup>24</sup> Parents also feared the  
53 possibility of surgery making seizures worse (e.g., increased frequency, duration). Thus, making  
54 the decision to have surgery “in vain.”<sup>24</sup>

1  
2  
3  
4  
5  
6  
7  
8  
9  
10  
11  
12  
13  
14  
15  
16  
17  
18  
19  
20  
21  
22  
23  
24  
25  
26  
27  
28  
29  
30  
31  
32  
33  
34  
35  
36  
37  
38  
39  
40  
41  
42  
43  
44  
45  
46  
47  
48  
49  
50  
51  
52  
53  
54  
55  
56  
57  
58  
59  
60

However, for many parents, the decision to pursue surgery brought relief and feelings of hope. Parents in one study expressed gratitude once they finally decided to pursue surgery as they felt it was “demanding to not know if surgery would be possible.”<sup>23</sup> Parents also reported feeling hope for improvements in their child’s health and wellbeing after they decided to choose surgery. Finally, after making the decision to pursue surgery (or learning it was a viable option), parents reported that they hoped for candidacy,<sup>19, 21</sup> and experienced relief when a date was set.<sup>21</sup>

#### **TDF Domain 4: Social Influence**

**Summary statement:** *Three studies provided evidence to suggest that surgery is a family decision that requires outside support from other caregivers “experiencing the same thing” and from a healthcare professional acting as “champions.” (Moderate confidence) <sup>20-22</sup>*

Parents reported the value of connecting with other parents who were on a similar treatment journey (e.g., had a child with epilepsy that was unresponsive to medication) and had experiences and expertise that they could draw on.<sup>20, 21</sup> Peer connections helped parents understand the surgical procedural from a “parental perspective” and provided “emotional support.”<sup>21</sup> Parents also reported the value of having a good team of epilepsy providers and a “champion” (e.g., doctor, nurse, or social worker) to advocate for them and help them navigate purposefully through their journey.<sup>20</sup> One mother described one such champion, a nurse coordinator, as a “life saver,” who helped in getting referrals and pushed her to seek better care for her child.<sup>20</sup> Another mother described her child’s pediatrician as her champion because “he encouraged me and gave me...confidence.”<sup>20</sup>

Parents described seeing treatment decision-making as a family choice and indicated the importance of involving partners, siblings, grandparents, and the child (where developmentally appropriate). Parents found engaging the whole family in the decision-making process to be generally helpful, as the experience of the child’s epilepsy and potential consequences of treatment impacted the whole family.<sup>21</sup> However, for some families, decision-making regarding surgery gave rise to conflicts. For example, one mother described herself as more agreeable to surgery than the child’s father because, as the primary parent, she “witnessed” the true extent of their child’s seizures.<sup>21</sup>

#### **TDF Domain 5: Beliefs about Consequences**

**Summary statement:** *Five studies provided evidence to suggest that parents undergo a transformation from seeing surgery as a last resort to the only option for their child to have a chance at a better life. Surgery became a viable option as parents realized that their child’s current treatment was not working or it had unacceptable side effects, and some saw the side effects of surgery as less daunting than the disease. <sup>19-24</sup>*

Parents of children who went on to have surgery reported going through a transformation in thinking of surgery as a “last resort” to a “necessary and hopeful option.”<sup>19</sup> This transformation in thinking evolved as parents acquired greater understanding about their child’s illness and prognosis, experience in treating their child with other treatments, acquired knowledge about the potential risks and benefits of surgery, and processed the diverse emotions associated with surgery.<sup>19, 20</sup>

An important part of parents’ moving toward a decision about surgery was weighing what they perceived to be the benefits and harms of surgery.<sup>21, 24</sup> In terms of benefits, parents hoped surgery would lead to improved outcomes such as seizure reduction and the opportunity for a “normal life” without the side effects of medications.<sup>21, 24</sup> Some parents were skeptical about the efficacy of surgery due to their experiences with medications and the ketogenic diet.

1  
2  
3 According to parents, these treatments were associated with side effects, negatively affected their  
4 child's quality of life, and provided only minimal improvement in seizure control.<sup>21</sup> In terms of  
5 adverse effects, parents were concerned that surgery would lead to surgical complications or  
6 various post-surgical impairments, including a change in personality, loss of speech or motor  
7 function, and behavioral problems.<sup>24</sup> A small number of parents reported having no concerns  
8 before surgery.<sup>24</sup>  
9

10 Beyond rational consideration of the benefits and risks of surgery, parents often reported  
11 coming to the decision to select surgery only after exhausting all other treatment options.<sup>21-23</sup>  
12 Parents expressed feeling like "it was the only choice [they] could make"<sup>21</sup> and their "only  
13 option"<sup>21</sup> in improving their child's outcomes or preventing their condition from getting worse.  
14 Parents understood there were potential complications associated with surgery, but "preferred to  
15 take a risk [in proceeding with surgery] rather than live in constant fear"<sup>23</sup> or having a child that  
16 "was unconscious all the time."<sup>22</sup>  
17  
18

### 19 **TDF Domain 6: Environmental Context and Resources**

20 **Summary statement:** *Three studies provided evidence that parents face challenges in*  
21 *navigating the healthcare system and interacting with professionals to find the "right doctor" or*  
22 *care team for their child. Parents value having their concerns heard and being engaged in the*  
23 *decision-making process (Low confidence)<sup>19-21, 23</sup>*  
24

25 Parents from one study in the U.S.<sup>19, 20</sup> and another in Sweden.<sup>23</sup> reported experiencing  
26 significant barriers with navigating the healthcare system. In the U.S.,<sup>19, 20</sup> parents expressed  
27 frustration with the extensive time it took to find the right doctor after navigating various doctors  
28 from different specialties across multiple institutions. Prior to selecting surgery for their child,  
29 parents reported difficulties in finding the "right doctor" with knowledge to "effectively identify  
30 the problem, and then make a clear plan of action." Parents attributed these difficulties to the  
31 lack of pediatric neurologists in their local area, inconsistencies in treatment recommendations,  
32 and rigid adherence to center-specific treatment protocols.<sup>19, 20</sup> Once parents made a decision to  
33 pursue surgery, they reported battles with insurance companies to pay for surgery.<sup>19, 20</sup> Parents in  
34 the Sweden reported similar frustrations with "the bureaucracy" as they felt it took "a long time  
35 to get a correct diagnosis" and "adequate support." They "thought that it would be helpful if the  
36 authorities understood that parents only asked for help when they had reached their limit, and  
37 then, urgent help was necessary."<sup>23</sup>  
38

39 Parents listed several provider-specific interactions they found to be either enablers or  
40 barriers to their experience of identifying and selecting appropriate treatment for their child.  
41 With respect to enablers, parents valued when providers validated (and shared) their concerns,  
42 gave their time and fostered trust, and engaged parents in the treatment decision-making process.  
43 Barriers noted by parents included having their concerns doubted or ignored,<sup>19, 23</sup> receiving  
44 inadequate information or support (especially before the epilepsy was recognized to be drug-  
45 resistant),<sup>23</sup> and feeling excluded from discussions about their child's surgical candidacy.<sup>21</sup> One  
46 study reported that parents perceived physician variability in knowledge about epilepsy and their  
47 lack of understanding about the pre-surgical referral process and appropriateness of surgery as  
48 barriers.<sup>19</sup> Parents in one study reported how they felt more reassured when their child received  
49 care from a comprehensive team of professionals with diverse expertise.<sup>20</sup> Parents from one  
50 study suggested providers give an "earlier and softer introduction of surgery as a possible  
51 treatment option."<sup>21</sup>  
52  
53

54 [Box 1 goes here]  
55  
56  
57

## Discussion

Understanding caregiver perspectives about treatments for childhood epilepsy is important to ensure that parents are appropriately supported during their decision-making process. Our qualitative evidence synthesis of five studies, which had minimal risks to rigor, identified key findings across six domains: Knowledge, Emotions, Social/Professional Role and Identify, Social Influences, Beliefs about Consequences, Environmental Context and Resources. However, the evidence was limited surgical treatment. Overall, these findings suggest that the decision to select surgery for childhood epilepsy involves parents going through a complex journey of acquiring extensive knowledge, working through intense emotions and perceived parental responsibilities, needing family and peer support, transforming beliefs about epilepsy and potential treatment options, and navigating various barriers and facilitators of the healthcare system.

These findings are supported by a similar review conducted by Samanta et al. (2021) that sought to understand caregiver decision-making around epilepsy surgery for children with drug-resistant epilepsy.<sup>25</sup> In their synthesis of a similar body of evidence, these reviewers identified the following as key determinants: knowledge and information, communication and care coordination, caregivers' emotional state, and socioeconomic factors. While the findings of our review are similar to Samanta, our scope and methodology differ. We sought to explore caregiver decision-making around all treatments for epilepsy, not just surgery. We also used rigorous methodological tools (e.g., TDF and GRADE-CerQual). Use of these tools strengthens our findings by placing them within a framework that identifies facilitators and barriers, and by providing criteria to establish confidence in the certainty of these findings.

Through the TDF framework, we identified decision domains that presented potential barriers to care that are amenable to action. For example, parents often felt that they did not have enough information to make decisions about surgery. They reported experiencing intense psychological distress and exhaustion during their decision-making process and felt these emotions acutely through their role as parents responsible for making a potentially life-altering decision for their child. Parents also reported valuing connections with peers who were going through (or had gone through) the same experience. Healthcare systems and providers may therefore consider providing parents with resources, such as patient navigators to help guide them through the healthcare system and better understand the care pathway. They can also help parents to access peer support and advocates<sup>26, 27</sup>

The findings also identified gaps in the evidence base regarding parents' perceptions and decision-making processes. Foremost, we did not identify any studies exploring parent decision-making around non-surgical treatment options. Qualitative studies that prospectively explore caregiver decision-making about these treatments are needed to determine if perspectives differ from those about surgery. We also did not identify evidence mapping to certain TDF domains that we expected to find evidence for, such as Goals. Studies included in this review were vague and inconsistent in reporting parent's goals or their desired outcomes of treatment. Some studies noted that parents wanted what 'was best' for their child or they would be happy with a reduction in seizure frequency. Survey data collected from parents considering surgery found the primary goal was seizure freedom (98%), followed by reduced medication (90%), and improved cognition (82%).<sup>28</sup> We also did not identify evidence for the domain of Memory, Attention, and Decision process. Thus, we could not determine if parents become more skilled and confident in their decision-making over time through experience and acquired knowledge.

1  
2  
3 Similarly, we found limited evidence for the domain of Environmental context and  
4 Resources. Further evidence is needed to understand how culture and equity play a role in  
5 parents' perceptions about treatment and their capacity to access care for their child. For  
6 example, many parents' reported important barriers in knowledge, access to professionals to  
7 diagnose and treat their child, and challenges with accessing and paying for surgery. The extent  
8 to which these factors would be the same or increase among families from different socio-  
9 economic backgrounds and cultures with varying economic, educational, and social resources  
10 needs further exploration. One may hypothesize that parents' perceptions of treatments for  
11 epilepsy vary depending on cultural perspectives of the condition and availability and access to  
12 care.  
13

### 14 **Strengths and limitations**

15  
16 This review followed contemporary standards for the conduct of qualitative synthesis, which  
17 includes the use of a best-fit framework approach, a theory-informed framework to guide our  
18 synthesis and extraction, and use of the CASP and GRADE-CerQual tool to assess the rigor and  
19 confidence of our findings. The use of the TDF is a particular strength of this review as it lends  
20 itself to both actionable interventions (e.g., mapping intervention strategies to key domains  
21 identified) and future research (e.g., further examination of domains not identified in the  
22 evidence such as 'memory, attention, and decision processes'). However, as with all qualitative  
23 research, selecting which data to extract and how to code it is ultimately a subjective process. We  
24 attempted to limit subjectivity within our group by coding in duplicate and having regular  
25 meetings to ensure consistency across and within domains.  
26

27 One primary limitation is that the data in all studies included in this were collected  
28 retrospectively. Parents were asked for their perceptions *after* their child had undergone surgery.  
29 This may have resulted in selection bias, as studies recruited parents of children referred to and  
30 proceeded with surgery. Thus, findings may not be fully reflective of the wider population of  
31 parents who are making decisions regarding surgery. The perceptions of parents who declined  
32 surgery were not captured. The retrospective nature of the data collection may have also resulted  
33 in recall bias. The time from children's surgery to data collection ranged from 6 months to 10  
34 years. Parents may have forgotten important aspects of their journey to surgery or filled in gaps  
35 of memory due to experiences with the child's outcome. As described by one study, parent  
36 responses were "memories processed through emotions and colored from further experiences,  
37 which were then developed into opinions and personal views."<sup>23</sup>  
38  
39

### 40 **Conclusion**

41  
42 Parents of children with epilepsy navigate a complex process to decide whether to have their  
43 child undergo surgery. Educational resources, peer support, and patient navigators may help  
44 support parents through this process. More qualitative studies are needed to fully understand the  
45 diversity of experiences of parents across various points in the decision-making pathway and  
46 among different healthcare contexts. In particular, qualitative studies are needed that address  
47 parents' perceptions and experiences with selecting non-surgical epilepsy treatment options such  
48 as diet and medications.  
49  
50  
51  
52  
53  
54  
55  
56  
57

## Footnotes

**Contributors:** SU served as project lead and participated as a team member in identifying studies for inclusion, extracting and coding data, synthesizing findings, developing and grading summary statements, and drafting of initial report and manuscript; KK participated as team member in all aspects of data extraction, coding, synthesis, developing and grading summary statements, validating all findings, and revising initial drafts of manuscript; RW participated in all aspects of data extraction, coding, synthesis, developing summary statements, and reviewing manuscript; GA coordinated and revised search strategies and participated in all aspects of data extraction, coding, synthesis, and review of manuscript; KR participated in all aspects of data extraction, coding, synthesis, developing summary statements, and reviewing manuscript; MV participated in all aspects of data extraction, coding, synthesis, developing summary statements, and reviewing manuscript.

**Acknowledgements:** We would like to give a special thank you to Jane Noyes, MSc, DPhil for her mentorship, review, and support in the completion of this manuscript. We would also like to acknowledge Laura Koepfler, MLS of ECRI for her contribution in designing and running the literature searches.

**Funding:** This work was funded by the Agency for Healthcare Research and Quality through the following contracts: RTI-University of North Carolina EPC (290-2015-00011-I), Brown University EPC (290-2015-00002-I), ECRI Institute-Penn Medicine EPC (290-2015-00005-I), Johns Hopkins University EPC (290-2015-00006-I). No award or grant number.

**Disclaimer:** The findings and conclusions in this document are those of the authors, who are responsible for its contents; the findings and conclusions do not necessarily represent the views of AHRQ. Therefore, no statement in this report should be construed as an official position of AHRQ or of the U.S. Department of Health and Human Services.

**Competing Interests:** None of the authors listed in this manuscript have competing interests

**Patient consent:** Not required.

**Ethics approval:** This study does not involve human or animal participants

**Data availability statement:** No additional data available.

## References

1. Russ SA, Larson K, Halfon N. A national profile of childhood epilepsy and seizure disorder. *Pediatrics*. 2012 Feb;129(2):256-64. doi: 10.1542/peds.2010-1371. PMID: 22271699.
2. Sarmast ST, Abdullahi AM, Jahan N. Current Classification of Seizures and Epilepsies: Scope, Limitations and Recommendations for Future Action. *Cureus*. 2020 Sep 20;12(9):e10549. doi: 10.7759/cureus.10549. PMID: 33101797.
3. Symonds JD, Elliott KS, Shetty J, et al. Early childhood epilepsies: epidemiology, classification, aetiology, and socio-economic determinants. *Brain*. 2021;144(9):2879-91. doi: 10.1093/brain/awab162.
4. Scheffer IE, Berkovic S, Capovilla G, et al. ILAE classification of the epilepsies: Position paper of the ILAE Commission for Classification and Terminology. *Epilepsia*. 2017 Apr;58(4):512-21. doi: 10.1111/epi.13709. PMID: 28276062.
5. Rodenburg R, Meijer AM, Deković M, et al. Family factors and psychopathology in children with epilepsy: a literature review. *Epilepsy Behav*. 2005 Jun;6(4):488-503. doi: 10.1016/j.yebeh.2005.03.006. PMID: 15907744.
6. Rosati A, De Masi S, Guerrini R. Antiepileptic Drug Treatment in Children with Epilepsy. *CNS Drugs*. 2015;29(10):847-63. doi: 10.1007/s40263-015-0281-8. PMID: 26400189.
7. Mutanana N, Tsvere M, Chiweshe MK. General side effects and challenges associated with anti-epilepsy medication: A review of related literature. *Afr J Prim Health Care Fam Med*. 2020 Jun 30;12(1):e1-e5. doi: 10.4102/phcfm.v12i1.2162. PMID: 32634006.
8. Wirrell EC. Predicting pharmacoresistance in pediatric epilepsy. *Epilepsia*. 2013 May;54 Suppl 2:19-22. doi: 10.1111/epi.12179. PMID: 23646966.
9. Martin-McGill KJ, Jackson CF, Bresnahan R, et al. Ketogenic diets for drug-resistant epilepsy. *Cochrane Database Syst Rev*. 2018 Nov 7;11(11):Cd001903. doi: 10.1002/14651858.CD001903.pub4. PMID: 30403286.
10. Noyes J BA, Cargo M, Flemming K, Harden A, Harris J, Garside R, Hannes K, Pantoja T, Thomas J. Chapter 21: Qualitative evidence. In: Higgins JPT TJ, Chandler J, Cumpston M, Li T, Page MJ, Welch VA, ed *Cochrane Handbook for Systematic Reviews of Interventions version 63*. Cochrane; 2019 (updated February 2022).
11. Porritt K, Gomersall J, Lockwood C. JBI's systematic reviews: study selection and critical appraisal. *AJN The American Journal of Nursing*. 2014;114(6):47-52.
12. Wong G, Greenhalgh T, Westhorp G, et al. RAMESES publication standards: meta-narrative reviews. *BMC Medicine*. 2013 2013/01/29;11(1):20. doi: 10.1186/1741-7015-11-20.
13. Programme CAS. CASP Qualitative Studies Checklist. 2022.
14. Michie S, Johnston M, Abraham C, et al. Making psychological theory useful for implementing evidence based practice: a consensus approach. *Qual Saf Health Care*. 2005 Feb;14(1):26-33. doi: 10.1136/qshc.2004.011155. PMID: 15692000.
15. Cane J, O'Connor D, Michie S. Validation of the theoretical domains framework for use in behaviour change and implementation research. *Implement Sci*. 2012 Apr 24;7:37. doi: 10.1186/1748-5908-7-37. PMID: 22530986.
16. Glenton C, Carlsen B, Lewin S, et al. Applying GRADE-CERQual to qualitative evidence synthesis findings-paper 5: how to assess adequacy of data. *Implement Sci*. 2018 Jan 25;13(Suppl 1):14. doi: 10.1186/s13012-017-0692-7. PMID: 29384077.

- 1  
2  
3 17. Colvin CJ, Garside R, Wainwright M, et al. Applying GRADE-CERQual to qualitative evidence synthesis  
4 findings-paper 4: how to assess coherence. *Implement Sci.* 2018 Jan 25;13(Suppl 1):13. doi: 10.1186/s13012-017-  
5 0691-8. PMID: 29384081.  
6
- 7 18. Lewin S, Bohren M, Rashidian A, et al. Applying GRADE-CERQual to qualitative evidence synthesis  
8 findings-paper 2: how to make an overall CERQual assessment of confidence and create a Summary of Qualitative  
9 Findings table. *Implement Sci.* 2018 Jan 25;13(Suppl 1):10. doi: 10.1186/s13012-017-0689-2. PMID: 29384082.  
10
- 11 19. Baca CB, Pieters HC, Iwaki TJ, et al. "A journey around the world": Parent narratives of the journey to  
12 pediatric resective epilepsy surgery and beyond. *Epilepsia.* 2015 Jun;56(6):822-32. doi: 10.1111/epi.12988. PMID:  
13 25894906.  
14
- 15 20. Pieters HC, Iwaki T, Vickrey BG, et al. "It was five years of hell": Parental experiences of navigating and  
16 processing the slow and arduous time to pediatric resective epilepsy surgery. *Epilepsy Behav.* 2016 Sep;62:276-84.  
17 doi: 10.1016/j.yebeh.2016.07.019. PMID: 27521720.  
18
- 19 21. Heath G, Abdin S, Begum R, et al. Putting children forward for epilepsy surgery: A qualitative study of UK  
20 parents' and health professionals' decision-making experiences. *Epilepsy Behav.* 2016 Aug;61:185-91. doi:  
21 10.1016/j.yebeh.2016.05.037. PMID: 27371883.  
22
- 23 22. O'Brien J, Gray V, Woolfall K. Child and parent experiences of childhood epilepsy surgery and adjustment to  
24 life following surgery: A qualitative study. *Seizure.* 2020 Dec;83:83-8. doi: 10.1016/j.seizure.2020.10.006. PMID:  
25 33120326.  
26
- 27 23. Ozanne A, Verdinelli C, Olsson I, et al. Parental experiences before and long-term after their children's  
28 hemispherotomy - A population-based qualitative study. *Epilepsy Behav.* 2016 Jul;60:11-6. doi:  
29 10.1016/j.yebeh.2016.04.025. PMID: 27176878.  
30
- 31 24. Sylvén I, Olsson I, Hallböök T, et al. 'In the best case seizure-free' - Parental hopes and worries before and  
32 satisfaction after their child's epilepsy surgery. *Epilepsy Behav.* 2020 Sep;110:107153. doi:  
33 10.1016/j.yebeh.2020.107153. PMID: 32480305.  
34
- 35 25. Samanta D, Hoyt ML, Perry MS. Parental experience and decision-making for epilepsy surgery: A systematic  
36 review of qualitative and quantitative studies. *Epilepsy Behav.* 2021 Oct;123:108263. doi:  
37 10.1016/j.yebeh.2021.108263. PMID: 34428615.  
38
- 39 26. Michie S, van Stralen MM, West R. The behaviour change wheel: a new method for characterising and  
40 designing behaviour change interventions. *Implement Sci.* 2011 Apr 23;6:42. doi: 10.1186/1748-5908-6-42. PMID:  
41 21513547.  
42
- 43 27. Gainforth HL, Sheals, K., Atkins, L., Jackson, R., & Michie, S. . Developing interventions to change recycling  
44 behaviors: A case study of applying behavioral science. . *Applied Environmental Education & Communication.*  
45 2016;15(4):325-39.  
46
- 47 28. Bach Q, Thomale UW, Müller S. Parents' and children's decision-making and experiences in pediatric epilepsy  
48 surgery. *Epilepsy Behav.* 2020 Jun;107:107078. doi: 10.1016/j.yebeh.2020.107078. PMID: 32320930.  
49  
50  
51  
52  
53  
54  
55  
56  
57



## Box 1. Example excerpts for TDF domains

### Box 1. Example excerpts for TDF domains

#### Knowledge

- [Parent]: “I googled it until I couldn’t google anymore, and I think that gave me a better understanding of what was going on.”<sup>21</sup>.
- A mother who stated, “I just think knowledge is power and it also brings some comfort to making a good decision,” exemplified the sense of empowerment associated with gaining fluency in the language of epilepsy<sup>19</sup>

#### Social/Professional Role and Identity

- Parents discussed feeling pressure from a need to “do the right thing” by their child; that is, choosing the treatment option that would give their child the best chance of reaching their full potential.<sup>21</sup>

#### Emotion

- Participant descriptions highlighted the significant impact that epilepsy had upon on the child’s and family’s lives prior to epilepsy surgery. Worries about seizures and the associated risks led to constant fatigue for some: “you’re tired yourself before you even go out the door”<sup>22</sup>
- [Parent]: “At first I was horrified at the thought of this innocent – having her brain opened and operated on. It just seemed so barbaric”<sup>20</sup>

#### Social Influences

- Most participants described finding it difficult to talk to others about epilepsy, with several reporting that they limited the information they shared, or withholding the diagnosis altogether. “Gosh, we didn’t tell anybody. We were ashamed.”<sup>22</sup>
- [E]xchanging shared experiences with peers gave direction to decision-making because it helped with processing complex factual and emotional information”<sup>20</sup>.

#### Beliefs about Consequences

- This transformation occurred as parents became increasingly aware of the severity of their child’s epilepsy and its impact on their child’s and their future life. Although surgery remained scary, epilepsy was or became scarier than surgery. As some parents feared that their child would die from epilepsy, surgery was no longer perceived as an elective treatment<sup>19</sup>
- They wanted that their child could do everything their friends could do like “play football, cycle, and swim independently”. Some parents mentioned that they wanted their child to be able to go back to school and have a “proper social life” while some parents referenced the future hoping that the child would be better placed to get a job and driving license as a result of surgery<sup>24</sup>
- Parents felt that epilepsy surgery was a question of life or death, of chaos or control. It was terrifying to see the child so ill. The epilepsy was uncontrolled, and drugs gave side effects. Parents felt that there was no alternative to surgery. However, it was a difficult decision since they did not know the outcome.<sup>23</sup>

#### Environmental Context and Resources

- Trust and safety characterized the relations to the pediatric neurologists and specialist nurses. It strengthened parents’ trust to see that the pediatric neurologist fought for the child and that the parents’ opinions counted in the decision process. Parents appreciated continuous contact.<sup>23</sup>
- Looking back, one father voiced happiness that he listened to his parental instincts rather than the opinion of one doctor. He (doctor) said, “‘I don’t believe that she is a surgical candidate.’ As a parent, I listened and I wanted to think otherwise.... In hindsight, I’m glad I didn’t listen to him.”<sup>19</sup>

**Table 1. Characteristics of included studies**

| Study, year, country                         | Population                                                                                                                                      | Number of parents                                                            | Time from surgery to data Collection | Study aim                                                                                                                                                                                                                                                                                                                                                                                                                                                                                | Data collection methods                                                           | Data analysis methods |
|----------------------------------------------|-------------------------------------------------------------------------------------------------------------------------------------------------|------------------------------------------------------------------------------|--------------------------------------|------------------------------------------------------------------------------------------------------------------------------------------------------------------------------------------------------------------------------------------------------------------------------------------------------------------------------------------------------------------------------------------------------------------------------------------------------------------------------------------|-----------------------------------------------------------------------------------|-----------------------|
| Baca <sup>1</sup> , 2015; Pieters, 2016, USA | Parents of children who had previously undergone resective epilepsy surgery                                                                     | 37 (individual parents)<br>31 mothers; 6 other                               | NR                                   | Baca, 2015: To identify the nature and range of parent-perceived barriers to timely receipt of pediatric epilepsy surgery.<br>Pieters, 2016: A) To describe thoroughly the parental experiences and perceptions of this slow and arduous period prior to the presurgical referral and evaluation to a comprehensive pediatric epilepsy center. B) To delineate the range of parent identified factors, or facilitators, that helped move families forward along their journey to surgery | Semi-structured interviews lasting on average 29 minutes (range 10 to 60 mins)    | Thematic analysis     |
| Heath, 2016, UK                              | Parents of children who had undergone pediatric epilepsy surgery<br>Also interviewed healthcare professionals caring for children with epilepsy | 9 (individual parents)<br>8 mothers; 1 father<br>10 healthcare professionals | NR                                   | To explore how parents and health professionals make decisions regarding pediatric epilepsy surgery to identify:<br>A) factors that influence the process of decision-making regarding pediatric epilepsy surgery from the perspective of parents and professionals and B) the support needs of those considering surgery as a treatment option for a child with medically intractable epilepsy                                                                                          | Semi-structured interviews lasting about 1 hour, and non-participant observations | Thematic analysis     |
| O'Brien, 2020, UK                            | Parents and their children who had gone through resective epilepsy surgery                                                                      | 9 parents (1 couple; 7 individual parents)<br>8 mothers; 1 father            | 6 months to 3 years                  | To explore children's and parents' perspectives on the journey prior to and following surgical treatment, with a focus on the emotional experiences of children and their parents throughout the surgery journey                                                                                                                                                                                                                                                                         | Semi-structured interviews lasting 25 to 75 mins                                  | Thematic analysis     |
| Ozanne, 2016, Sweden                         | Parents of children who had previously undergone resective epilepsy surgery                                                                     | 24 parents<br>13 mothers; 11 fathers                                         | 5 to 10 years                        | To explore parental experiences before and after hemispherotomy as reported at a long-term follow-up and the parents' views on received information and support                                                                                                                                                                                                                                                                                                                          | Interviews (length of time not reported)                                          | Content analysis      |
| Sylvén, 2020, Sweden                         | Parents of children who were undergoing resective epilepsy surgery (and 2 years post-surgery)                                                   | 107 (parental responses to both surveys)                                     | 2 years                              | A) To understand parental hopes and worries before their child underwent epilepsy surgery and B) To understand parental satisfaction two years after their child had undergone epilepsy surgery                                                                                                                                                                                                                                                                                          | Surveys (open-ended questions)                                                    | Thematic analysis     |

<sup>1</sup> Baca & Pieters included the same patient population but reported on different aspects of parent perspectives.

**Table 2. GRADE-CERQual summary of findings statements and ratings**

| Summary of Review Findings                                                                                                                                                                                                                                                                                                                                                   | Studies contributing                                 | Methodological limitations (CASP ratings)                                                                                                 | Coherence                                                                                | Adequacy <sup>2</sup>                                                                                                                                                                                                                                                                | Relevance                        | CERQual assessment         | Explanation of CERQual assessment                                                                            |
|------------------------------------------------------------------------------------------------------------------------------------------------------------------------------------------------------------------------------------------------------------------------------------------------------------------------------------------------------------------------------|------------------------------------------------------|-------------------------------------------------------------------------------------------------------------------------------------------|------------------------------------------------------------------------------------------|--------------------------------------------------------------------------------------------------------------------------------------------------------------------------------------------------------------------------------------------------------------------------------------|----------------------------------|----------------------------|--------------------------------------------------------------------------------------------------------------|
| <u>Knowledge</u> : Caregivers value information about epilepsy, its treatment options, and navigating the healthcare system to access timely and effective treatment for their child. Despite feeling overwhelmed by the complexity and sometimes contradictory information, caregivers value learning this new language so they can become better advocates for their child | Baca/Pieters<br>Heath<br>O'Brien<br>Ozanne           | <i>Minor concerns</i> : Nature of relationship between researchers and participants not reported; retrospective recruitment. <sup>1</sup> | <i>No or very minor concerns</i> : Findings reflect the complexity and variation of data | <i>Minor concerns</i> : Included studies limited to surgery as treatment decision. We did not identify studies meeting inclusion criteria that addressed other treatments, such as diet or medications. Each study addressed knowledge acquisition and reported on it in some depth. | <i>No or very minor concerns</i> | <i>Moderate confidence</i> | Four studies with similar findings; minor concerns related to methods and limited treatment scope (surgery). |
| <u>Social/professional role and identity</u> , parents feel a sense of duty and need to do the right thing in selecting a treatment for their child.                                                                                                                                                                                                                         | Heath                                                | <i>Minor concerns</i> : Nature of relationship between researchers and participants not reported; retrospective recruitment. <sup>1</sup> | <i>No or very minor concerns</i> : Findings reflect the complexity and variation of data | <i>Minor concern</i> : Included studies limited to surgery as treatment decision.                                                                                                                                                                                                    | <i>No or very minor concerns</i> | <i>Moderate confidence</i> | One study; minor concerns related to methods and limited treatment scope (surgery).                          |
| <u>Emotion</u> , parents experience the journey of navigating their child's epilepsy and ultimately selecting surgical treatment as an emotionally fraught one with emotions ranging from exhaustion, desperation and fear to relief and hope.                                                                                                                               | Baca/Pieters<br>Heath<br>O'Brien<br>Ozanne<br>Sylvén | <i>Minor concerns</i> : Nature of relationship between researchers and participants not reported; retrospective recruitment. <sup>1</sup> | <i>No or very minor concerns</i> : Findings reflect the complexity and variation of data | <i>No or very minor concerns</i> : All 4 studies contributed to the rich depth of the varied emotions from fear of the illness to fear of the surgery to the mental toll that took on families and hope                                                                              | <i>No or very minor concerns</i> | <i>Moderate confidence</i> | Five studies with similar findings; minor concerns related to methods and limited treatment scope (surgery). |

| Summary of Review Findings                                                                                                                                                                                                                                                                                                                                                                                  | Studies contributing                                 | Methodological limitations (CASP ratings)                                                                                                   | Coherence                                                                                  | Adequacy <sup>2</sup>                                                                                                                                                                               | Relevance                        | CERQual assessment         | Explanation of CERQual assessment                                                                                                                               |
|-------------------------------------------------------------------------------------------------------------------------------------------------------------------------------------------------------------------------------------------------------------------------------------------------------------------------------------------------------------------------------------------------------------|------------------------------------------------------|---------------------------------------------------------------------------------------------------------------------------------------------|--------------------------------------------------------------------------------------------|-----------------------------------------------------------------------------------------------------------------------------------------------------------------------------------------------------|----------------------------------|----------------------------|-----------------------------------------------------------------------------------------------------------------------------------------------------------------|
|                                                                                                                                                                                                                                                                                                                                                                                                             |                                                      |                                                                                                                                             |                                                                                            | and relief that surgery may offer                                                                                                                                                                   |                                  |                            |                                                                                                                                                                 |
| <u>Social influences</u> , surgery is a family decision that requires outside support from other parents “experiencing the same thing” and from a healthcare professional acting as “champions.”                                                                                                                                                                                                            | Pieters<br>Heath<br>O'Brien                          | <i>Minor concerns:</i><br>Nature of relationship between researchers and participants not reported; retrospective recruitment. <sup>1</sup> | <i>No or very minor concerns:</i><br>Findings reflect the complexity and variation of data | <i>No or very minor concerns</i>                                                                                                                                                                    | <i>No or very minor concerns</i> | <i>Moderate confidence</i> | Three studies with similar findings; minor concerns related to methods and limited treatment scope (surgery).                                                   |
| <u>Beliefs about consequences</u> , caregivers undergo a transformation from seeing surgery as a last resort to the only option for their child to have a chance at a better life. Surgery became a viable option as parents realized that their child’s current treatment was not working or it had unacceptable side effects, and some saw the side effects of surgery as less daunting than the disease. | Baca/Pieters<br>Heath<br>O'Brien<br>Ozanne<br>Sylvén | <i>Minor concerns:</i><br>Nature of relationship between researchers and participants not reported; retrospective recruitment. <sup>1</sup> | <i>No or very minor concerns:</i><br>Findings reflect the complexity and variation of data | <i>No or very minor concerns</i>                                                                                                                                                                    | <i>No or very minor concerns</i> | <i>Moderate confidence</i> | Five studies with similar findings; minor concerns related to methods and limited treatment scope (surgery).                                                    |
| <u>Environmental context and resources</u> , parents expressed challenges in navigating the healthcare system and interacting with professionals to find the “right doctor” or care team for their child. Parents value having their concerns heard and being engaged in the decision-making process.                                                                                                       | Baca/Pieters<br>Heath<br>Ozanne                      | <i>Minor concerns:</i><br>Nature of relationship between researchers and participants not reported; retrospective recruitment. <sup>1</sup> | <i>No or very minor concerns:</i><br>Findings reflect the complexity and variation of data | <i>Moderate concerns:</i> The three studies are limited to surgery and to US, Sweden and the UK. Healthcare barriers seemed particularly salient to U.S. respondents (including insurance barriers) | <i>No or very minor concerns</i> | <i>Low confidence</i>      | Three studies with similar findings; moderate concerns related to methods, limited scope (surgery), and context-specific healthcare experiences of participants |

<sup>1</sup>Retrospective recruitment raises concerns about selection bias.

<sup>2</sup>We only downgraded for adequacy due to studies being limited to surgery when the summarized theme was based on parent’s general feelings about epilepsy and could thus potentially apply to parent decisions regarding other treatment choices.

1  
2  
3 Figure 1 Legend: Preferred Reporting Items for Systematic Reviews and Meta-Analyses flow diagram of studies identified  
4

5 Figure 2 Legend: Figure 2 presents the six theoretical domains identified in this review that impacted treatment decision-making and presents the main themes  
6 representing those domains  
7  
8  
9  
10  
11  
12  
13  
14  
15  
16  
17  
18  
19  
20  
21  
22  
23  
24  
25  
26  
27  
28  
29  
30  
31  
32  
33  
34  
35  
36  
37  
38  
39  
40  
41  
42  
43  
44  
45  
46  
47

For peer review only

1  
2  
3  
4  
5  
6  
7  
8  
9  
10  
11  
12  
13  
14  
15  
16  
17  
18  
19  
20  
21  
22  
23  
24  
25  
26  
27  
28  
29  
30  
31  
32  
33  
34  
35  
36  
37  
38  
39  
40  
41  
42  
43  
44  
45  
46  
47  
48  
49  
50  
51  
52  
53  
54  
55  
56  
57  
58  
59  
60

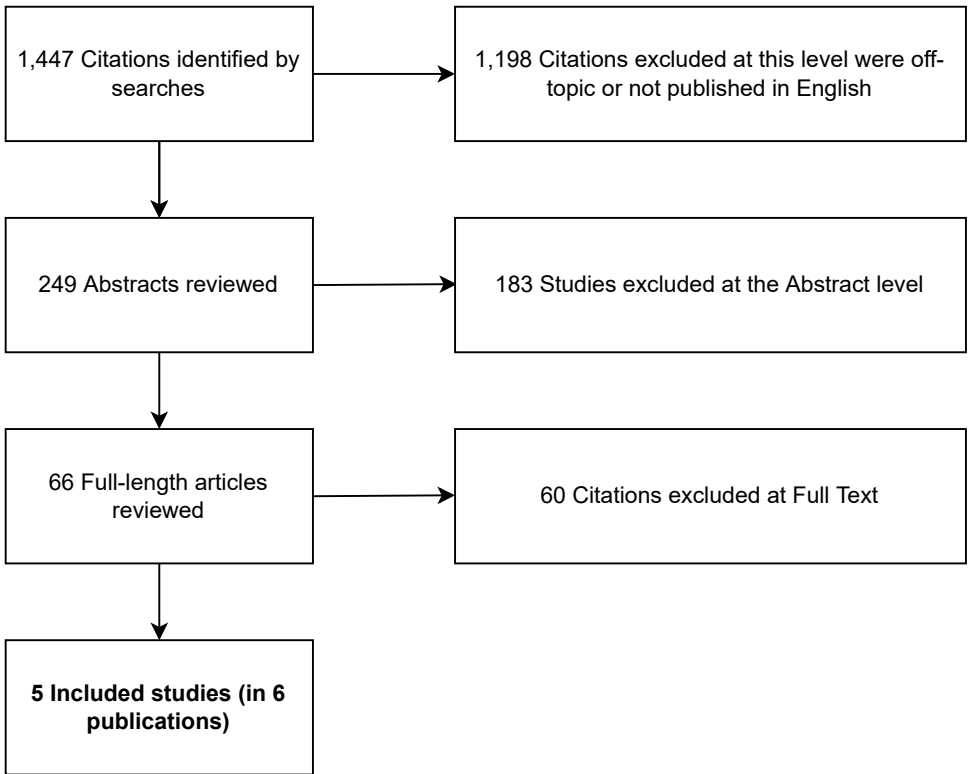

1  
2  
3  
4  
5  
6  
7  
8  
9  
10  
11  
12  
13  
14  
15  
16  
17  
18  
19  
20  
21  
22  
23  
24  
25  
26  
27  
28  
29  
30  
31  
32  
33  
34  
35  
36  
37  
38  
39  
40  
41  
42  
43  
44  
45  
46

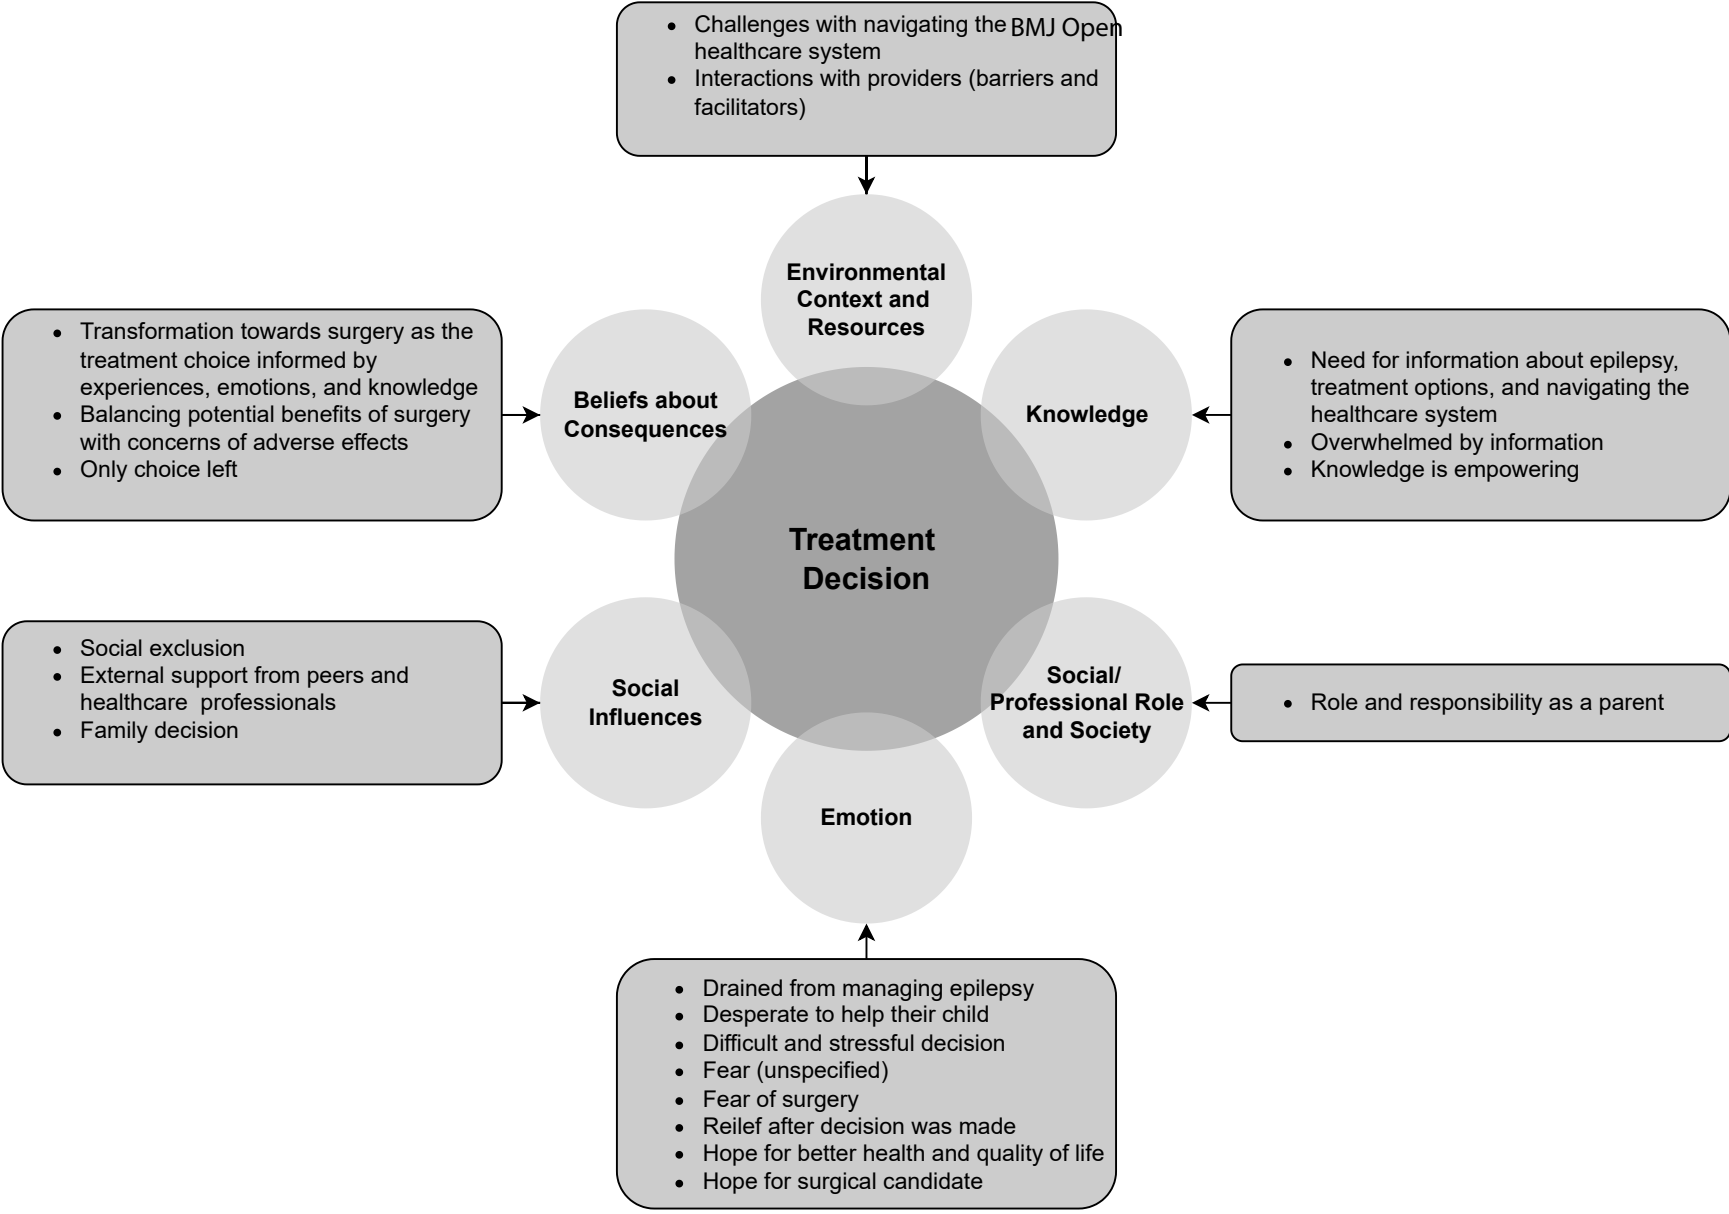

# APPENDIX A: Search Strategy

## EMBASE (Searched January 1, 1999, to August 19, 2021)

| Set | Concept                                                            | Search statement                                                                                                                                                                                                                                                                                                                                                                                                                                                                                                                                                                                                                                                                                                                                                                                   |
|-----|--------------------------------------------------------------------|----------------------------------------------------------------------------------------------------------------------------------------------------------------------------------------------------------------------------------------------------------------------------------------------------------------------------------------------------------------------------------------------------------------------------------------------------------------------------------------------------------------------------------------------------------------------------------------------------------------------------------------------------------------------------------------------------------------------------------------------------------------------------------------------------|
| 1   | Infantile/<br>Pediatric Epilepsies                                 | 'benign childhood epilepsy'/exp OR 'childhood absence epilepsy'/exp OR 'severe myoclonic epilepsy in infancy'/exp OR (dravet* NEXT/1 (disease OR syndrome))                                                                                                                                                                                                                                                                                                                                                                                                                                                                                                                                                                                                                                        |
| 2   | 0-3 Age Group and Epilepsy                                         | [infant]/lim OR [newborn]/lim OR newborn/exp OR [preschool]/lim OR 'preschool child'/exp OR toddler/exp OR (babies OR baby OR child*:ti OR infan* OR neonat* OR newborn* OR nicu OR paediatric* OR pediatric* OR preschool* OR toddler* OR 'very young'):ab,ti,kw OR ('younger than' OR under OR below) NEAR/3 (3 OR three) OR (3 OR three) NEAR/3 ('or below' OR 'or under' OR 'or younger') AND ('epilepsy'/exp OR 'epileptic patient'/exp OR epilep*:ti)                                                                                                                                                                                                                                                                                                                                        |
| 3   | Infantile Spasms/<br>Neonatal Seizures<br>(not requiring epilepsy) | 'infantile spasm'/exp OR (((infan* OR neonat* OR newborn*) NEAR/2 (convuls* OR seizure* OR spasm*)):ab,ti,kw)                                                                                                                                                                                                                                                                                                                                                                                                                                                                                                                                                                                                                                                                                      |
| 4   | Other Seizures (not requiring Epilepsy)                            | ([infant]/lim OR [newborn]/lim OR 'newborn'/exp OR babies:ab,ti,kw OR baby:ab,ti,kw OR infan*:ab,ti,kw OR neonat*:ab,ti,kw OR newborn*:ab,ti,kw OR nicu:ab,ti,kw) AND ('febrile convulsion'/exp OR 'seizure'/exp OR convuls*:ab,ti,kw OR spasm*:ab,ti,kw OR seizure*:ab,ti,kw)                                                                                                                                                                                                                                                                                                                                                                                                                                                                                                                     |
| 5   | Pharmacologic/<br>Vitamin Treatment                                | acetazolamide OR acth OR 'adrenocorticotrophic hormone' OR benzodiazepine* OR brivaracetam OR bromide OR cannabidiol OR carbamazepine OR clobazam OR clonazepam OR clorazepate OR corticotropin OR divalproex OR eslicarbazepine OR ethosuximide OR everolimus OR felbamate OR fenfluramine OR folate OR 'folic acid' OR frisium OR gabapentin OR lacosamide OR lamotrigine OR levetiracetam OR liposteroid OR lorazepam OR mesuximide OR methsuximide OR onfi OR oxcarbazepine OR perampanel OR phenobarbital OR phenytoin OR prednisone OR pregabalin OR primidone OR pyridoxine OR 'pyridoxal 5 phosphate' OR rufinamide OR sabril OR stiripentol OR thiopental OR thiopentone OR tiagabine OR topiramate OR valproate OR 'valproate semisodium' OR 'valproic acid' OR vigabatrin OR zonisamide |
| 6   | Diet<br>Therapy                                                    | 'ketogenic diet'/de OR (keto* OR ketogenic OR 'low glycemic index' OR 'medium chain triglyceride' OR 'modified atkins' OR 'modified keto' OR 'modified ketogenic'):ab,ti,kw                                                                                                                                                                                                                                                                                                                                                                                                                                                                                                                                                                                                                        |
| 7   | Surgical Procedures                                                | craniotomy/de OR hemispherectomy/de OR 'laser surgery'/de OR lobectomy/de OR 'corpus callosotomy' OR craniotom* OR (disconnect* NEAR/3 (hemispher* OR surg* OR procedure*)) OR hemispherectom* OR hemispherotom* OR lesionectom* OR lobectom* OR (laser* NEAR/3 (ablat* OR operat* OR procedure* OR surg*)) OR (multilobar NEAR/3 disconnect*) OR (palliat* NEAR/3 operat* OR procedure* OR surg*) OR resect* OR resection OR transect* OR transection* OR 'sublobar resection' OR 'subpial transection'                                                                                                                                                                                                                                                                                           |
| 8   | Brain Stimulation                                                  | 'brain depth stimulation'/de OR 'brain responsive neurostimulator'/de OR 'deep brain stimulator'/de OR 'nerve stimulation'/de OR 'nerve stimulator'/de OR 'vagus nerve stimulation'/de OR ('brain stimulat*' OR 'deep brain stimulat*' OR 'electric brain stimulat*' OR 'external trigeminal nerve stimulat*' OR 'responsive brain stimulat*' OR 'responsive neurostimulat*' OR 'vagus nerve stimulat*' OR stimulation OR stimulator*) OR ((brain OR 'deep brain' OR electric* OR responsive OR 'vagus nerve') NEAR/2 (electrostim* OR stimulat*)) OR neurostim*                                                                                                                                                                                                                                   |



|    |                                                              |                                                                                                                                                                                                                                                                                                                                                                                                                                                                                                                                                                                                                                                                                                                                                                                                                                                                                                                                                                                 |
|----|--------------------------------------------------------------|---------------------------------------------------------------------------------------------------------------------------------------------------------------------------------------------------------------------------------------------------------------------------------------------------------------------------------------------------------------------------------------------------------------------------------------------------------------------------------------------------------------------------------------------------------------------------------------------------------------------------------------------------------------------------------------------------------------------------------------------------------------------------------------------------------------------------------------------------------------------------------------------------------------------------------------------------------------------------------|
| 9  | Harms                                                        | anhidrosis/de OR 'adverse event'/de OR 'adverse drug reaction'/de OR 'behavior disorder'/de OR 'cognitive defect'/de OR 'developmental delay'/de OR 'developmental disorder'/de OR dystonia/de OR 'liver injury'/de OR 'loss of appetite'/de OR 'motor dysfunction'/de OR 'organ damage'/de OR 'patient harm'/de OR 'sleep disorder'/de OR sweating/de OR (advers* OR harm* OR 'side effect'):ab,ti,kw OR anhidrosis OR (appetite NEAR/3 (lose OR losing OR loss)) OR ((cognitiv* OR behavior* OR develop* OR motor OR movement OR neurodevelop*) NEAR/3 (effect* OR disorder* OR problem* OR symptom*)) OR ((cognitiv* OR develop* OR neurodevelopment*) NEAR/3 (delay* OR disorder* OR regress*)) OR dystonia OR hypohidrosis OR hypohydrosis OR (liver NEAR/3 (damag* OR injur*)) OR (miss* NEAR/3 milestone*) OR ((eat* OR perspir* OR sweat* OR sleep*) NEAR/3 (disorder* OR inability OR unable))                                                                         |
| 10 | Parental Preferences                                         | parent/de OR (parent* OR mother* OR father*):ab,ti,kw                                                                                                                                                                                                                                                                                                                                                                                                                                                                                                                                                                                                                                                                                                                                                                                                                                                                                                                           |
| 11 | Untreated Disease                                            | 'treatment refusal'/de OR ('not treated' OR 'no treatment' OR untreat*):ab,ti,kw OR (declin* OR forgo* OR 'not' OR no OR refus* OR withheld OR withhold*) NEXT/3 (treated OR treatment*)                                                                                                                                                                                                                                                                                                                                                                                                                                                                                                                                                                                                                                                                                                                                                                                        |
| 12 | Study Designs/<br>Publication Types                          | [english]/lim AND [1999-2020]/py NOT ([animals]/lim NOT [humans]/lim OR abstract:nc OR annual:nc OR 'book'/de OR ((case NEXT/1 (report* OR stud*)):ti) OR 'case report'/de OR 'case study'/de OR conference:nc OR 'conference abstract':it OR 'conference paper'/de OR 'conference paper':it OR 'conference proceeding':pt OR 'conference review':it OR congress:nc OR diagnos*:ti OR 'diagnosis'/mj OR 'diagnostic accuracy'/mj OR 'diagnostic procedures'/mj OR 'diagnostic test'/mj OR 'diagnostic test accuracy study'/mj OR 'differential diagnosis'/mj OR 'editorial'/de OR editorial:it OR 'erratum'/de OR guideline*:ti OR letter:it OR 'note'/de OR note:it OR meeting:nc OR 'practice guideline'/de OR 'review'/exp OR sessions:nc OR 'short survey'/de OR symposium:nc OR animal*:ti OR experimental:ti OR (vitro:ti NOT vivo:ti) OR canine:ti OR dog:ti OR dogs:ti OR mouse:ti OR mice:ti OR rabbit*:ti OR rat:ti OR rats:ti OR rodent*:ti OR sheep:ti OR swine:ti) |
| 13 | Combine sets                                                 | #1 OR #2 OR #3 OR #4                                                                                                                                                                                                                                                                                                                                                                                                                                                                                                                                                                                                                                                                                                                                                                                                                                                                                                                                                            |
| 14 | Combine sets<br>(KQ1 Pharmacology)                           | #13 AND #12 AND #5                                                                                                                                                                                                                                                                                                                                                                                                                                                                                                                                                                                                                                                                                                                                                                                                                                                                                                                                                              |
| 15 | Combine sets<br>(KQ2 Diet, Surgery, Brain Stimulation)       | #13 AND #12 AND (#6 OR #7 OR #8)                                                                                                                                                                                                                                                                                                                                                                                                                                                                                                                                                                                                                                                                                                                                                                                                                                                                                                                                                |
| 16 | Combine sets<br>(KQ3 Treatment Harms)                        | #13 AND #12 AND (#5 OR #6 OR #7 OR #8) AND 9                                                                                                                                                                                                                                                                                                                                                                                                                                                                                                                                                                                                                                                                                                                                                                                                                                                                                                                                    |
| 17 | Combine sets<br>(CQ1 Parental Preferences)                   | #13 AND #12 AND (#5 OR #6 OR #7 OR #8) AND #10                                                                                                                                                                                                                                                                                                                                                                                                                                                                                                                                                                                                                                                                                                                                                                                                                                                                                                                                  |
| 18 | Combine sets<br>(CQ2 Untreated/<br>Uncontrolled<br>Epilepsy) | #11 AND #12 AND #13                                                                                                                                                                                                                                                                                                                                                                                                                                                                                                                                                                                                                                                                                                                                                                                                                                                                                                                                                             |

|    |                         |                   |
|----|-------------------------|-------------------|
| 19 | Combine Sets<br>All KQs | #14 OR #15 OR #16 |
| 20 | Combine Sets<br>All CQs | #17 OR #18        |

### SocINDEX and Web of Science databases (Searched January 1, 1999, to August 19, 2021)

(epilep\* OR convuls\* OR seizure\* OR spasm\*)

AND

(acetazolamide OR acth OR 'adrenocorticotrophic hormone' OR benzodiazepine\* OR brivaracetam OR bromide OR cannabidiol OR carbamazepine OR clobazam OR clonazepam OR clorazepate OR corticotropin OR divalproex OR eslicarbazepine OR ethosuximide OR everolimus OR felbamate OR fenfluramine OR folate OR 'folic acid' OR frisium OR gabapentin OR lacosamide OR lamotrigine OR levetiracetam OR liposteroid OR lorazepam OR mesuximide OR methsuximide OR onfi OR oxcarbazepine OR perampanel OR phenobarbital OR phenytoin OR prednisone OR pregabalin OR primidone OR pyridoxine OR 'pyridoxal 5 phosphate' OR rufinamide OR sabril OR stiripentol OR thiopental OR thiopentone OR tiagabine OR topiramate OR valproate OR 'valproate semisodium' OR 'valproic acid' OR vigabatrin OR zonisamide OR keto\* OR ketogenic OR 'low glycemic index' OR 'medium chain triglyceride' OR 'modified atkins' OR 'modified keto' OR 'modified ketogenic' OR 'corpus callosotomy' OR craniotom\* OR (disconnect\* AND (hemispher\* OR surg\* OR procedure\*)) OR hemispherectom\* OR hemispherotom\* OR lesionectomy\* OR lobectomy\* OR (laser\* AND (ablat\* OR operat\* OR procedure\* OR surg\*)) OR (multilobar AND disconnect\*) OR (palliat\* AND operat\* OR procedure\* OR surg\*) OR resect\* OR resection OR transect\* OR transection\* OR 'sublobar resection' OR 'subpial transection' OR 'brain stimulat\*' OR 'deep brain stimulat\*' OR 'electric brain stimulat\*' OR 'external trigeminal nerve stimulat\*' OR 'responsive brain stimulat\*' OR 'responsive neurostimulat\*' OR 'vagus nerve stimulat\*' OR stimulation OR stimulator\*) OR ((brain OR 'deep brain' OR electric\* OR responsive OR 'vagus nerve') AND (electrostim\* OR stimulat\*)) OR neurostim\*)

AND

(parent\* OR mother\* OR father\*)

AND

(perception OR factor\* OR decision)

**CINAHL (Searched January 1, 1999, to August 19, 2021)**

| Set | Concept                              | Search statement                                                                                                                                                                                                                                                                                                                           |
|-----|--------------------------------------|--------------------------------------------------------------------------------------------------------------------------------------------------------------------------------------------------------------------------------------------------------------------------------------------------------------------------------------------|
| 1   | Childhood Epilepsy                   | "benign childhood epilepsy" OR "childhood absence epilepsy" OR "severe myoclonic epilepsy in infancy" OR dravet*                                                                                                                                                                                                                           |
| 2   | Epilepsy/<br>0-3 Age Group           | (babies OR baby OR child* OR infan* OR neonat* OR newborn* OR nicu OR paediatric* OR pediatric* OR preschool* OR toddler* OR "very young" OR "younger than three" OR "younger than 3" OR "under three" OR "under 3" OR "below three" OR "below 3" OR "3 or below" OR "3 or younger" OR "three or below" OR "three or younger") AND epilep* |
| 3   | Infantile Spasm/<br>Neonatal Seizure | "infantile spasm*" OR "neonatal seizure*" OR ((babies OR baby OR infan* OR neonat* OR newborn* OR nicu) AND (convuls* OR seizure* OR spasm*))                                                                                                                                                                                              |
| 4   | Parental Preferences                 | father* OR matern* OR mother* OR parent* OR patern*                                                                                                                                                                                                                                                                                        |
| 5   | Harms                                | "adverse drug reaction" OR "adverse effect*" OR "adverse event*" OR anhidrosis OR appetite* OR behavior* OR behaviour* OR cognitiv* OR defect* OR delay* OR development* OR disorder* OR dysfunction* OR dyston* OR harm* OR impair* OR injur* OR liver OR motor OR "organ damage*" OR "sleep disorder*" OR sweat* OR "side effect"        |
| 6   | Untreated<br>Disease                 | "treatment refusal" OR "not treated" OR "no treatment" OR untreat* OR "decline treatment" OR "declined treatment" OR "forgo* treatment" OR "refuse treatment" OR "refused treatment" OR "refusing treatment" OR "withheld treatment" OR "withhold treatment" OR "withholding treatment"                                                    |
| 7   | Combine Concepts                     | (S1 OR S2 OR S3) AND S4                                                                                                                                                                                                                                                                                                                    |
| 8   | Apply Limits                         | S7 AND (Published Date: 19990101-20210831; English Language; Exclude MEDLINE records)                                                                                                                                                                                                                                                      |
| 9   | Combine concepts                     | (S1 OR S2 OR S3) AND (S5 AND S6)                                                                                                                                                                                                                                                                                                           |
| 10  | Apply Limits                         | S9 AND (Published Date: 19990101-20210831; English Language; Exclude MEDLINE records)                                                                                                                                                                                                                                                      |

**PsycINFO (Searched January 1, 1999, to August 19, 2021)**

| Set | Concept                              | Search statement                                                                                                                                                                                                                                                                                                                                                                                      |
|-----|--------------------------------------|-------------------------------------------------------------------------------------------------------------------------------------------------------------------------------------------------------------------------------------------------------------------------------------------------------------------------------------------------------------------------------------------------------|
| 1   | Childhood<br>Epilepsy                | "benign childhood epilepsy" OR "childhood absence epilepsy" OR "severe myoclonic epilepsy in infancy" OR (dravet* adj1 (disease OR syndrome)) OR ((child* OR infan* OR paediatr* OR pediatr*) adj1 epilep*)                                                                                                                                                                                           |
| 2   | Epilepsy/<br>0-3 Age Group           | (baby OR babies OR infan* OR neonat* OR newborn* OR nicu OR paediatric* OR pediatric* OR preschool OR toddler* OR "very young" OR ("younger than" OR under OR below) adj3 ("3" OR three)) OR ("3" OR three) adj3 ("or below" OR "or under" OR "or younger")) AND (epilepsy/ OR epileptic seizures/ OR epileps* OR epileptic*)                                                                         |
| 3   | Infantile Spasm/<br>Neonatal Seizure | ((babies OR baby OR infan* OR neonat* OR newborn* OR nicu) adj3 (convuls* OR seizure* OR spasm*))                                                                                                                                                                                                                                                                                                     |
| 4   | Parental Preferences                 | parents/ OR (patern* OR parent* OR matern* OR mother* OR father*)                                                                                                                                                                                                                                                                                                                                     |
| 5   | Harms                                | behavior disorders/ OR cognitive impairment/ OR delayed development/ OR developmental disabilities/ OR liver disorders/ OR motor development/ OR "side effects (drug)"/ OR "side effects (treatment)"/ OR sleep wake disorders/ OR sweating/ OR (advers* OR anhidrosis OR dystoni* OR harm* OR harm* OR hypohidrosis OR hypohydrosis OR "organ damage") OR (appetite adj3 (lose* OR losing OR loss OR |

1  
2  
3  
4  
5  
6  
7  
8  
9  
10  
11  
12  
13  
14  
15  
16  
17  
18  
19  
20  
21  
22  
23  
24  
25  
26  
27  
28  
29  
30  
31  
32  
33  
34  
35  
36  
37  
38  
39  
40  
41  
42  
43  
44  
45  
46  
47

|    |                           |                                                                                                                                                                                                                                                                                                                                                                                                                         |
|----|---------------------------|-------------------------------------------------------------------------------------------------------------------------------------------------------------------------------------------------------------------------------------------------------------------------------------------------------------------------------------------------------------------------------------------------------------------------|
|    |                           | lost)) OR ((cognitiv* OR behavior* OR develop* OR motor OR movement OR neurodevelop*) adj3 (effect* OR deficit* OR disorder* OR problem* OR symptom*)) OR ((cognitiv* OR develop* OR motor* OR neurodevelopment*) adj3 (delay* OR disorder* OR regress*)) OR ((liver OR organ*) adj3 (damag* OR injur*)) OR (miss* adj3 milestone*) OR ((eat* OR perspir* OR sweat* OR sleep*) adj3 (disorder* OR inability OR unable)) |
| 6  | Untreated Disease         | treatment refusal/ OR ("not treated" OR "no treatment" OR untreat*) OR ((declin* OR forgo* OR "not" OR no OR refus* OR withheld OR withhold*) adj3 (treated OR treatment*))                                                                                                                                                                                                                                             |
| 7  | Combine Sets              | (1 OR 2 OR 3) AND 4                                                                                                                                                                                                                                                                                                                                                                                                     |
| 8  | Apply Limits              | limit 7 to yr="1999 - 2021"                                                                                                                                                                                                                                                                                                                                                                                             |
| 9  | Apply Limits              | limit 8 to up=19000101-20210819                                                                                                                                                                                                                                                                                                                                                                                         |
| 10 | Apply Limits              | 9 NOT (1* or 2* or 3* or 4* or 5* or 6* or 7* or 8* or 9*).pm.                                                                                                                                                                                                                                                                                                                                                          |
| 11 | CQ1                       | limit 10 to english language                                                                                                                                                                                                                                                                                                                                                                                            |
| 12 | Combine Sets              | (1 OR 2 OR 3) AND (5 AND 6)                                                                                                                                                                                                                                                                                                                                                                                             |
| 13 | Apply Limits Apply Limits | Limit 12 to yr="1999 - 2021"                                                                                                                                                                                                                                                                                                                                                                                            |
| 14 | Apply Limits              | limit 13 to up=19000101-20210819                                                                                                                                                                                                                                                                                                                                                                                        |
| 15 | Apply Limits              | 14 NOT (1* or 2* or 3* or 4* or 5* or 6* or 7* or 8* or 9*).pm.                                                                                                                                                                                                                                                                                                                                                         |
| 16 | CQ2                       | limit 5 to english language                                                                                                                                                                                                                                                                                                                                                                                             |

1  
2  
3  
4  
5  
6  
7  
8  
9  
10  
11  
12  
13  
14  
15  
16  
17  
18  
19  
20  
21  
22  
23  
24  
25  
26  
27  
28  
29  
30  
31  
32  
33  
34  
35  
36  
37  
38  
39  
40  
41  
42  
43  
44  
45  
46  
47

## APPENDIX B: The Theoretical Domains Framework\*

| Domain                                       | Definition                                                                                                                                | Constructs                                                                                                                                                                                   |
|----------------------------------------------|-------------------------------------------------------------------------------------------------------------------------------------------|----------------------------------------------------------------------------------------------------------------------------------------------------------------------------------------------|
| <b>Knowledge</b>                             | An awareness of the existence of something                                                                                                | Knowledge (including knowledge of condition/scientific rationale)<br>Procedural knowledge<br>Knowledge of task environment                                                                   |
| <b>Skills</b>                                | An ability or proficiency acquired through practice                                                                                       | Skills<br>Skills development<br>Competence<br>Ability<br>Interpersonal skills<br>Practice<br>Skill assessment                                                                                |
| <b>Social/professional role and identity</b> | A coherent set of behaviors and displayed personal qualities of an individual in a social or work setting                                 | Professional identity<br>Professional role<br>Social identity<br>Identity<br>Professional boundaries<br>Professional confidence<br>Group identity<br>Leadership<br>Organizational commitment |
| <b>Beliefs about capabilities</b>            | Acceptance of the truth, reality or validity about an ability, talent or faculty that a person can put to constructive use)               | Self-confidence<br>Perceived competence<br>Self-efficacy<br>Perceived behavioral control<br>Beliefs<br>Self-esteem<br>Empowerment<br>Professional confidence                                 |
| <b>Optimism</b>                              | The confidence that things will happen for the best or that desired goals will be attained                                                | Optimism<br>Pessimism<br>Unrealistic optimism<br>Identity                                                                                                                                    |
| <b>Beliefs about Consequences</b>            | Acceptance of the truth, reality, or validity about outcomes of a behaviour in a given situation                                          | Beliefs<br>Outcome expectancies<br>Characteristics of outcome expectancies<br>Anticipated regret<br>Consequents                                                                              |
| <b>Reinforcement:</b>                        | Increasing the probability of a response by arranging a dependent relationship, or contingency, between the response and a given stimulus | Rewards (proximal/distal, valued/not valued, probable/improbable)<br>Incentives<br>Punishment<br>Consequents<br>Reinforcement<br>Contingencies<br>Sanctions                                  |

| Domain                                          | Definition                                                                                                                                                                             | Constructs                                                                                                                                                                                    |
|-------------------------------------------------|----------------------------------------------------------------------------------------------------------------------------------------------------------------------------------------|-----------------------------------------------------------------------------------------------------------------------------------------------------------------------------------------------|
| <b>Intention</b>                                | A conscious decision to perform a behaviour or a resolve to act in a certain way                                                                                                       | Stability of intentions<br>Stages of change model<br>Transtheoretical model and stages of change                                                                                              |
| <b>Goals</b>                                    | Mental representations of outcomes or end states that an individual wants to achieve                                                                                                   | Goals (distal/proximal)<br>Goal priority<br>Goal/target setting<br>Goals (autonomous/controlled)<br>Action planning<br>Implementation intention                                               |
| <b>Memory, attention and decision processes</b> | The ability to retain information, focus selectively on aspects of the environment and choose between two or more alternatives                                                         | Memory<br>Attention<br>Attention control<br>Decision-making<br>Cognitive overload/tiredness                                                                                                   |
| <b>Environmental context and resources</b>      | Any circumstance of a person's situation or environment that discourages or encourages the development of skills and abilities, independence, social competence and adaptive behaviour | Environmental stressors<br>Resources/material resources<br>Organizational culture/climate<br>Salient events/critical incidents<br>Person environment interaction<br>Barriers and facilitators |
| <b>Social influences</b>                        | Those interpersonal processes that can cause individuals to change their thoughts, feelings, or behaviours                                                                             | Social pressure<br>Social norms<br>Group conformity<br>Social comparisons<br>Group norms<br>Social support<br>Power<br>Intergroup conflict<br>Alienation<br>Group identity<br>Modelling       |
| <b>Emotion</b>                                  | A complex reaction pattern, involving experiential, behavioural, and physiological elements, by which the individual attempts to deal with a personally significant matter or event    | Fear<br>Anxiety<br>Affect<br>Stress<br>Depression<br>Positive/negative affect<br>Burn-out                                                                                                     |
| <b>Behavioral regulation</b>                    | Anything aimed at managing or changing objectively observed or measured actions                                                                                                        | Self-monitoring<br>Breaking habit<br>Action planning                                                                                                                                          |

\*British spelling of definitions is kept from original publication  
 Atkins L, Francis J, Islam R, O'Connor D, Patey A, Ivers N, Foy R, Duncan EM, Colquhoun H, Grimshaw JM, Lawton R, Michie S. A guide to using the Theoretical Domains Framework of behaviour change to investigate implementation problems. *Implement Sci.* 2017 Jun 21;12(1):77. doi: 10.1186/s13012-017-0605-9. PMID: 28637486; PMCID: PMC5480145.

### APPENDIX C. CERQual assessment components

| CERQual Components         | Definition                                                                                                                                                                                               |
|----------------------------|----------------------------------------------------------------------------------------------------------------------------------------------------------------------------------------------------------|
| Methodological limitations | The extent to which there are problems in the design or conduct of the primary studies supporting a review finding. We used our CASP assessment of each study to guide our assessment of this component. |
| Coherence                  | An assessment of how clear and cogent the fit is between the data from the primary studies and the review finding.                                                                                       |
| Relevance                  | The extent to which the body of evidence from the primary studies supporting a review finding is applicable to the context specified in the review question.                                             |
| Adequacy                   | The degree of richness and quantity of data supporting a review finding.                                                                                                                                 |

Noyes J, Booth A, Lewin S, et al. Applying GRADE-CERQual to qualitative evidence synthesis findings—paper 6: how to assess relevance of the data. *Implement Sci*. 2018 Jan 25;13(Suppl 1):4. doi: 10.1186/s13012-017-0693-6. PMID: 29384080.

APPENDIX D. Methodological appraisal ratings using the CASP tool

| CASP question                                                                   | Study            |                  |                   |                  |                           |
|---------------------------------------------------------------------------------|------------------|------------------|-------------------|------------------|---------------------------|
|                                                                                 | O'Brien, 2020    | Syiven, 2020     | Heath et al. 2016 | Ozanne, 2016     | Pieters, 2016; Baca, 2015 |
| Was there a clear statement of the aims of the research?                        | Yes              | Yes              | Yes               | Yes              | Yes                       |
| Was the qualitative methodology appropriate?                                    | Yes              | Yes              | Yes               | Yes              | Yes                       |
| Was the research design appropriate to address the aims of the research?        | Yes              | Yes              | Yes               | Yes              | Yes                       |
| Was the recruitment strategy appropriate to the aims of the research?           | No <sup>1</sup>  | No <sup>1</sup>  | No <sup>1</sup>   | No <sup>1</sup>  | No <sup>1</sup>           |
| Was data collected in a way that addressed the research issue                   | Yes              | Yes              | Yes               | Yes              | Yes                       |
| Was the relationship between researcher and participants adequately considered? | Can't tell       | Can't tell       | Can't tell        | Yes <sup>2</sup> | Can't tell                |
| Were ethical issues taken into consideration?                                   | Yes <sup>3</sup> | Yes <sup>3</sup> | Yes <sup>3</sup>  | Yes <sup>3</sup> | Can't tell                |
| Was there sufficient rigor?                                                     | Yes              | Yes              | Yes               | Yes              | Yes                       |
| Is there a clear statement of findings?                                         | Yes              | Yes              | Yes               | Yes              | Yes                       |
| How valuable is the research? <sup>4</sup>                                      | Yes              | Yes              | Yes               | Yes              | Yes                       |
| Overall risk to rigor                                                           | Low              | Low              | Low               | Low              | Low                       |

Abbreviations: CASP: Critical Appraisal Skills Programme

<sup>1</sup> Participants in these studies were recruited after their child underwent surgery, raising concerns about selection bias due to selecting parents who were a) referred to surgery, b) proceeded with surgery, and c) experience some level of success with surgery. Excludes parents of a child with drug-resistant surgery who were not referred to surgery, who choose not to proceed with surgery, or whose child did not achieve desired outcomes.

<sup>2</sup> Interviewers and researchers not part of care/surgery team

<sup>3</sup> Approved by university ethics committee

<sup>4</sup> "Yes" rating given when study: a) discussed contribution to existing knowledge or understanding, b) identified new areas where research is necessary, and c) discussed whether or how the findings can be transferred to other populations or considered other ways the research may be used



### APPENDIX E. Coding extracts for treatment decisions for childhood epilepsy into the Theoretical Domains Framework

| TDF domain | Author, Year, PMID      | Extracted text <sup>A</sup>                                                                                                                                                                                                                                                                                                                                                                                                                                                                                                                              | Theme                                                                                        |
|------------|-------------------------|----------------------------------------------------------------------------------------------------------------------------------------------------------------------------------------------------------------------------------------------------------------------------------------------------------------------------------------------------------------------------------------------------------------------------------------------------------------------------------------------------------------------------------------------------------|----------------------------------------------------------------------------------------------|
| Knowledge  | Baca, 2015, 25894906    | With the recognition that “something is wrong,” parents sought information from multiple sources in an attempt to understand seizures and epilepsy and become better advocates for their child.                                                                                                                                                                                                                                                                                                                                                          | Need for information about epilepsy, treatment options, and navigating the healthcare system |
| Knowledge  | Baca, 2015, 25894906    | Parents reported difficulties as they sought information about seizures, epilepsy, medications, and surgery....Parents sought information from a variety of disparate sources including physicians, the Internet, books, and family/friends.                                                                                                                                                                                                                                                                                                             | Need for information about epilepsy, treatment options, and navigating the healthcare system |
| Knowledge  | Baca, 2015, 25894906    | Through this journey, parents learned to navigate a complicated medical system filled with doctors of different specialties, multiple hospitals, insurance approvals, and numerous treatment options                                                                                                                                                                                                                                                                                                                                                     | Need for information about epilepsy, treatment options, and navigating the healthcare system |
| Knowledge  | Peters, 2016, 27521720  | Parents also had to learn about the intricacies of the healthcare system including the types of doctors that were needed to care for their children                                                                                                                                                                                                                                                                                                                                                                                                      | Need for information about epilepsy, treatment options, and navigating the healthcare system |
| Knowledge  | Heath, 2016, 27371883   | Parents perceived the information they received from professionals as inadequate to make an informed decision. They therefore sought out additional information regarding the surgical procedure and outcomes. Aiming to comprehend what surgery would entail, parents requested information in lay language and searched the internet for information and videos.                                                                                                                                                                                       | Need for information about epilepsy, treatment options, and navigating the healthcare system |
| Knowledge  | Heath, 2016, 27371883   | “I googled it until I couldn't google anymore and I think that gave me a better understanding of what was going on.”                                                                                                                                                                                                                                                                                                                                                                                                                                     | Need for information about epilepsy, treatment options, and navigating the healthcare system |
| Knowledge  | Heath, 2016, 27371883   | Finally, parents emphasized the importance of receiving adequate information regarding epilepsy surgery, including information presented in a variety of formats (e.g., booklets, photographs, videos). They also suggested that a ‘frequently asked questions’ information sheet would have been beneficial. “I know I got a little booklet about epilepsy surgery services, but it would have been nice for us to have some extra information... just some written up case studies of kids that have gone through, had the same, you know, operation.” | Need for information about epilepsy, treatment options, and navigating the healthcare system |
| Knowledge  | Heath, 2016, 27371883   | These included ...additional information provision                                                                                                                                                                                                                                                                                                                                                                                                                                                                                                       | Need for information about epilepsy, treatment options, and navigating the healthcare system |
| Knowledge  | O'Brien, 2020, 33120326 | [I]t was felt that a greater awareness of potential changes besides seizure control prior to surgery would have been helpful for children and their families in developing realistic expectations and preparing for post-surgical adjustment. They just tell you medical stuff about it, the recovery, not that it'll be different...They just tell you about having no seizures [...] They don't tell you what it's actually going to be like.                                                                                                          | Need for information about epilepsy, treatment options, and navigating the healthcare system |
| Knowledge  | Ozanne, 2016, 27176878  | Sometimes, parents received more information from other parents, than from the physician. They were disappointed if they felt that information was withheld                                                                                                                                                                                                                                                                                                                                                                                              | Need for information about epilepsy, treatment options, and navigating the healthcare system |
| Knowledge  | Ozanne, 2016, 27176878  | Parents thought that it was important to receive the information that surgery was aimed to treat the epilepsy and not other disabilities, such as behavioral problems, in order to have realistic expectations. They emphasized the importance of being informed about both positive and negative outcomes and risks. Even if surgery was a medical success, the family's life situation was                                                                                                                                                             | Need for information about epilepsy, treatment options, and navigating the healthcare system |

| TDF domain               | Author, Year, PMID      | Extracted text <sup>A</sup>                                                                                                                                                                                                                                                                                                                                                                                                                                                                                                                                                                                                                                                                            | Theme                               |
|--------------------------|-------------------------|--------------------------------------------------------------------------------------------------------------------------------------------------------------------------------------------------------------------------------------------------------------------------------------------------------------------------------------------------------------------------------------------------------------------------------------------------------------------------------------------------------------------------------------------------------------------------------------------------------------------------------------------------------------------------------------------------------|-------------------------------------|
|                          |                         | sometimes characterized by sorrow and problems. The deterioration, expected or unexpected, of e.g., motor function, speech, visual field, or attention made life more difficult and burdensome.                                                                                                                                                                                                                                                                                                                                                                                                                                                                                                        |                                     |
| Knowledge                | Baca, 2015, 25894906    | Parents also reported little initial familiarity with epilepsy and that they felt overwhelmed trying to learn a new language of epilepsy because of the “avalanche of information coming at us.”                                                                                                                                                                                                                                                                                                                                                                                                                                                                                                       | Overwhelmed by information          |
| Knowledge                | Pieters, 2016, 27521720 | She described the hard and time-consuming struggle of trying to synthesize information on her own “because there really wasn’t a lot out there and when you’re hearing different things from different specialists it’s very difficult for parents to make heads or tails of it”. She spent “six months combing through the literature reading everybody’s publications from places all over the world ... because I wasn’t getting a straight answer ... my husband was saying to me you know are you going to go and get your degree in neuroscience after this ... but you know it’s your child, you want to do the best by them and you know you want them to be able to achieve their potential”. | Overwhelmed by information          |
| Knowledge                | Baca, 2015, 25894906    | As they acquired more epilepsy knowledge, however, many parents felt more empowered and able to ask questions and participate more effectively in the care of their child                                                                                                                                                                                                                                                                                                                                                                                                                                                                                                                              | Knowledge is empowering             |
| Knowledge                | Baca, 2015, 25894906    | A mother who stated, “I just think knowledge is power and it also brings some comfort to making a good decision,” exemplified the sense of empowerment associated with gaining fluency in the language of epilepsy                                                                                                                                                                                                                                                                                                                                                                                                                                                                                     | Knowledge is empowering             |
| Knowledge                | Heath, 2016, 27371883   | Increasing their own knowledge about medically intractable epilepsy and the available treatment options empowered parents to participate more fully in the decision-making process. “I said to him ‘don’t tell me in a doctor’s term, tell it me in a parent’s term. I want to know the ins and outs; I want to know exactly what the risks are but in terms that I understand”                                                                                                                                                                                                                                                                                                                        | Knowledge is empowering             |
| Knowledge                | Pieters, 2016, 27521720 | [P]arents took on the responsibility for learning as exemplified by the parent who naturally ‘corrected’ her language to imply her understanding of the different terms that clinicians use, “(the seizures) were not controlled ... or intractable as you guys call them.”                                                                                                                                                                                                                                                                                                                                                                                                                            | Knowledge is empowering             |
| Knowledge                | Pieters, 2016, 27521720 | Being open to learn and learning itself occurred while parents became epilepsy experts in order to be effective advocates for their children                                                                                                                                                                                                                                                                                                                                                                                                                                                                                                                                                           | Knowledge is empowering             |
| Knowledge                | Pieters, 2016, 27521720 | In order to have productive information exchanges with clinicians and engage in shared decision-making, parents realized that they had to learn about a very unfamiliar and unforeseen situation                                                                                                                                                                                                                                                                                                                                                                                                                                                                                                       | Knowledge is empowering             |
| Knowledge                | Pieters, 2016, 27521720 | The lack of understandable information and the experience of information imbalance between the parent and the physician were overwhelming as experienced by a father who described him and his wife as “pretty pragmatic.” He said, “The beginning was terrible, because you’re of course dealing with ... specialists in things and that you’ve pretty much never even heard of .... It was tough in the beginning, really tough ... (the information that we found) was written by doctors for doctors. It’s kinda tough when you don’t know what you’re talking about to get through that.                                                                                                          | Knowledge is empowering             |
| Social role and identity | Heath, 2016, 27371883   | However, they also reported a sense of duty to be “strong” (P1) and “brave” (P3, 4) for their children, wishing to protect them from their feelings of anxiety.                                                                                                                                                                                                                                                                                                                                                                                                                                                                                                                                        | Role and responsibility as a parent |
| Social role and identity | Heath, 2016, 27371883   | Parents discussed feeling pressure from a need to ‘do the right thing’ by their child; that is, choosing the treatment option that would give their child the best chance of reaching their full potential                                                                                                                                                                                                                                                                                                                                                                                                                                                                                             | Role and responsibility as a parent |

| TDF domain | Author, Year, PMID      | Extracted text <sup>A</sup>                                                                                                                                                                                                                                                                                                                                                                                                                                                                                                                                                                                       | Theme                            |
|------------|-------------------------|-------------------------------------------------------------------------------------------------------------------------------------------------------------------------------------------------------------------------------------------------------------------------------------------------------------------------------------------------------------------------------------------------------------------------------------------------------------------------------------------------------------------------------------------------------------------------------------------------------------------|----------------------------------|
| Emotion    | Baca, 2015, 25894906    | Parents reported personal and family stress throughout the journey. Caring for children with a chronic, severe, and paroxysmal neurologic condition meant being "on call" all the time; they had to be prepared to respond to an emergency at all times                                                                                                                                                                                                                                                                                                                                                           | Drained from managing epilepsy   |
| Emotion    | O'Brien, 2020, 33120326 | Participant descriptions highlighted the significant impact that epilepsy had upon on the child's and family's lives prior to epilepsy surgery. Worries about seizures and the associated risks led to constant fatigue for some: "you're tired yourself before you even go out the door" (Charlie – mother). In some cases, experiences of epilepsy impacted on their lives to such a degree that parents referred to children as "not having a life" (Charlie - mother)                                                                                                                                         | Drained from managing epilepsy   |
| Emotion    | O'Brien, 2020, 33120326 | Child mood and behavioural difficulties-stress, secrecy and shame. Before surgery children's mood and behavioura difficulties were a common, causing fear and stress w hich negatively impacted upon family relationships: "If there w as something there, she w ould get it, she w ould w ant to attack you w ith it". (Jessica – mother) Many described how increased supervision led to a change in their parenting role, negatively impacting on the relationship they or their other children had w ith their child: "I w as just his carer really and didn't have a relationship w ith him" (Jack - mother) | Drained from managing epilepsy   |
| Emotion    | Baca, 2015, 25894906    | Parents frequently described that medication trials continued often w ith little to no mention of surgery. One mother told of her frustrations w ith multiple medications, "It w as, 'Let's work on all the different medical aspects or medicines before going to surgery or even talking about surgery.'"                                                                                                                                                                                                                                                                                                       | Desperate to help their child    |
| Emotion    | Pieters, 2016, 27521720 | Parents felt desperate not only to find a treatment option that w ould work, but also to persevere and actively do something that w as productive and necessary to help their child                                                                                                                                                                                                                                                                                                                                                                                                                               | Desperate to help their child    |
| Emotion    | Pieters, 2016, 27521720 | Wanted to play an active role                                                                                                                                                                                                                                                                                                                                                                                                                                                                                                                                                                                     | Desperate to help their child    |
| Emotion    | Pieters, 2016, 27521720 | [W]anted to use time constructively                                                                                                                                                                                                                                                                                                                                                                                                                                                                                                                                                                               | Desperate to help their child    |
| Emotion    | Pieters, 2016, 27521720 | Another mother remembered that she felt "desperate" to take her adolescent son to another doctor, but she needed to w ait for referrals because of insurance                                                                                                                                                                                                                                                                                                                                                                                                                                                      | Desperate to help their child    |
| Emotion    | Pieters, 2016, 27521720 | [P]arents felt frustrated and desperate to get help for their child.                                                                                                                                                                                                                                                                                                                                                                                                                                                                                                                                              | Desperate to help their child    |
| Emotion    | Heath, 2016, 27371883   | Following indication of surgery as a potential treatment, parents and families faced w hat they described as a "difficult decision" (P5) w hich w as experienced as "daunting", "frightening", "scary", and "stressful"                                                                                                                                                                                                                                                                                                                                                                                           | Difficult and stressful decision |
| Emotion    | Pieters, 2016, 27521720 | "It w as not only in terms of time, it w as mentally draining as w ell. It took a lot of time and it took a lot of concentrated thought to figure this out."                                                                                                                                                                                                                                                                                                                                                                                                                                                      | Difficult and stressful decision |
| Emotion    | Ozanne, 2016, 27176878  | Parents w ere afraid and w orried                                                                                                                                                                                                                                                                                                                                                                                                                                                                                                                                                                                 | Fear (unspecified)               |

1  
2  
3  
4  
5  
6  
7  
8  
9  
10  
11  
12  
13  
14  
15  
16  
17  
18  
19  
20  
21  
22  
23  
24  
25  
26  
27  
28  
29  
30  
31  
32  
33  
34  
35  
36  
37  
38  
39  
40  
41  
42  
43  
44  
45  
46  
47

| TDF domain | Author, Year, PMID     | Extracted text <sup>A</sup>                                                                                                                                                                                                                                                                                                                                                                                                                                                                                                                                | Theme                                      |
|------------|------------------------|------------------------------------------------------------------------------------------------------------------------------------------------------------------------------------------------------------------------------------------------------------------------------------------------------------------------------------------------------------------------------------------------------------------------------------------------------------------------------------------------------------------------------------------------------------|--------------------------------------------|
| Emotion    | Heath, 2016, 27371883  | Last treatment of choice. For most parents, surgery was a last-resort treatment option that would only be considered following the exhaustion of all other options. This perception was influenced by parental fear regarding the irreversibility of surgery, as well as by professionals who had informed them that surgery was the only remaining treatment for controlling their child's seizures                                                                                                                                                       | Fear of surgery                            |
| Emotion    | Peters, 2016, 27521720 | For the majority of parents, brain surgery was a frightening possibility as described by the mother who said, "At first I was horrified at the thought of this innocent – having her brain opened and operated on. It just seemed so barbaric." Another mother's statement reflected upon her initial feelings of fear and avoidance when she said that she and her husband, "just couldn't deal with (having our daughter go through brain surgery)                                                                                                       | Fear of surgery                            |
| Emotion    | Sylvén, 2020, 32480305 | Parents mentioned the possibility that their child would experience "a change in personality" as a result of the surgery. They did not mention particular personality characteristics but feared that the child's personality would change for the worst                                                                                                                                                                                                                                                                                                   | Fear of surgery                            |
| Emotion    | Sylvén, 2020, 32480305 | Some parents reported that they were concerned that surgery would lead to a loss of function including that language/speech would be negatively affected. This concern included a worry that the child would develop speech difficulties or that they would lose the ability to talk completely as a result of the surgery. Parents also mentioned concerns that their child would acquire motor difficulties or even be paralyzed as a result of the surgery. Parents were also worried that any loss of function would be irreversible after the surgery | Fear of surgery                            |
| Emotion    | Sylvén, 2020, 32480305 | Many parents were worried that their child's epilepsy would be "worse" after the surgery, and as a result, the operation would have been "in vain". This included a risk that seizure frequency might increase, that seizures might be longer or be of a different character, or that seizure frequency might not improve.                                                                                                                                                                                                                                 | Fear of surgery                            |
| Emotion    | Ozanne, 2016, 27176878 | It was demanding not to know if surgery would be possible, and the parents were thankful when the decision was finally made                                                                                                                                                                                                                                                                                                                                                                                                                                | Relief after decision was made             |
| Emotion    | Sylvén, 2020, 32480305 | Many parents described a general hope for improved behavior and emotional functioning for their child. Behavior encompassed a wide variety of outcomes including that the child would be "calmer" with fewer behavioral outbursts, have better attention and concentration, and "feel better"                                                                                                                                                                                                                                                              | Hope for better health and quality of life |
| Emotion    | Sylvén, 2020, 32480305 | Parents hoped that the surgery would lead to better health and quality of life for their child                                                                                                                                                                                                                                                                                                                                                                                                                                                             | Hope for better health and quality of life |
| Emotion    | Sylvén, 2020, 32480305 | Parents often expressed a desire that surgery would result in their child being "more alert", less "tired", and "have more energy". They also mentioned that they hoped that surgery would result in better sleep quality                                                                                                                                                                                                                                                                                                                                  | Hope for better health and quality of life |
| Emotion    | Sylvén, 2020, 32480305 | Some parents mentioned complete freedom from medicine while others mentioned a reduction in AEDs. Parents believed a reduction in AEDs and associated adverse side effects of AEDs including "tiredness" would lead to a "normal life" for their child                                                                                                                                                                                                                                                                                                     | Hope for better health and quality of life |
| Emotion    | Baca, 2015, 25894906   | As parents learned that surgery was a potential viable option for their child, they "hoped" for candidacy                                                                                                                                                                                                                                                                                                                                                                                                                                                  | Hope for surgical candidacy                |
| Emotion    | Heath, 2016, 27371883  | When a decision to accept surgery had been made, parents hoped for the procedure to be carried out as soon as possible. Waiting for a date for surgery was described as an anxious time for parents, who experienced relief when a date was set.                                                                                                                                                                                                                                                                                                           | Hope for surgical candidacy                |

| TDF domain        | Author, Year, PMID      | Extracted text <sup>A</sup>                                                                                                                                                                                                                                                                                                                                                                                                                                                                                                                                                                                       | Theme                                                    |
|-------------------|-------------------------|-------------------------------------------------------------------------------------------------------------------------------------------------------------------------------------------------------------------------------------------------------------------------------------------------------------------------------------------------------------------------------------------------------------------------------------------------------------------------------------------------------------------------------------------------------------------------------------------------------------------|----------------------------------------------------------|
| Social influence  | O'Brien, 2020, 33120326 | This sense of exclusion impacted on the family as a whole, with siblings being unable to attend clubs or invite friends to their house, and parents feeling that they "couldn't join in with what other families were doing" (Lucy – mother). A common theme was parental concern that siblings had less time or attention: as "the focus was on him [child with epilepsy] a lot of the time" (Andrew – mother).                                                                                                                                                                                                  | Social exclusion                                         |
| Social influence  | O'Brien, 2020, 33120326 | Difficulties appeared to be exacerbated by a perceived lack of understanding from others, which appeared to be tied to a notion of epilepsy being an invisible condition, as seizures commonly occurred behind closed doors: "At the beginning, it was just generally at home, they didn't understand, they didn't get it. (Jessica – mother). Most participants described finding it difficult to talk to others about epilepsy, with several reporting that they limited the information they shared, or withholding the diagnosis altogether. "Gosh, we didn't tell anybody. We were ashamed". (Jack – mother) | Social exclusion                                         |
| Social influence  | Heath, 2016, 27371883   | In addition, parents emphasized the importance of accessing the experience and expertise of other parents who had followed a similar treatment pathway. Such peer support was suggested to facilitate understanding of the surgical procedure from a 'parental perspective', as well as provide emotional support. "If people could freely put their experiences on either a forum or even if you get a group, you know, parents talking to other parents who have gone through the experience to get a real idea of what's happening."                                                                           | External support from peers and healthcare professionals |
| Social influences | Heath, 2016, 27371883   | These included ... peer support                                                                                                                                                                                                                                                                                                                                                                                                                                                                                                                                                                                   | External support from peers and healthcare professionals |
| Social influence  | Pieters, 2016, 27521720 | Those parents who were able to connect with other parents and families of children with epilepsy found it to be very helpful to be able to communicate with peers with seizures unresponsive to medication who were on the same journey.                                                                                                                                                                                                                                                                                                                                                                          | External support from peers and healthcare professionals |
| Social influence  | Pieters, 2016, 27521720 | [E]xchanging shared experiences with peers gave direction to decision-making because it helped with processing complex factual and emotional information                                                                                                                                                                                                                                                                                                                                                                                                                                                          | External support from peers and healthcare professionals |
| Social influence  | Pieters, 2016, 27521720 | Three key facilitators were identified as follows: (a) having a champion, (b) finding a good team of epilepsy providers, and (c) connecting with others who shared the experience of epilepsy. (Fig. 1; Table 2). Such facilitators played a key role during the times when parents especially needed support to act purposefully and move out of vulnerable periods.                                                                                                                                                                                                                                             | External support from peers and healthcare professionals |
| Social influence  | Pieters, 2016, 27521720 | However, using time constructively happened after the parents described finding a champion that advocated for them and helped them navigate their journey. It was a champion, whether a doctor, nurse, or social worker, that facilitated steady and purposeful progress over more manageable portions of the journey                                                                                                                                                                                                                                                                                             | External support from peers and healthcare professionals |
| Social influence  | Pieters, 2016, 27521720 | One mother favorably described one such champion, a nurse coordinator, "she's like wonderful for us. She's been our lifesaver." These champions helped parents get referrals and seek different treatment options or were the persons that believed them and pushed them to seek better or additional care. For one mother, her daughter's pediatrician acted as her champion. She said, "He encouraged me and gave me the confidence that if I wasn't happy with what five other pediatric neurologists were saying that it was okay to go and you know continue to seek out other opinions."                    | External support from peers and healthcare professionals |

| TDF domain                 | Author, Year, PMID      | Extracted text <sup>A</sup>                                                                                                                                                                                                                                                                                                                                                                                                                                                                                                                                                                                                                                                                                   | Theme                                                                                                   |
|----------------------------|-------------------------|---------------------------------------------------------------------------------------------------------------------------------------------------------------------------------------------------------------------------------------------------------------------------------------------------------------------------------------------------------------------------------------------------------------------------------------------------------------------------------------------------------------------------------------------------------------------------------------------------------------------------------------------------------------------------------------------------------------|---------------------------------------------------------------------------------------------------------|
| Social influence           | Heath, 2016, 27371883   | Family decisions. Parents described decision-making as a family choice involving partners, siblings, grandparents, and the child (where developmentally appropriate). Discussing treatment options with family members was generally considered to be helpful. "I remember my mother-in-law was in Pakistan and I called her up and I was very teary...I felt like I had been punched in the stomach to be honest 'cause, you know, brain surgery is not something you take lightly and she said 'well if it's for his betterment and to improve his life then we will do whatever it takes'."                                                                                                                | Family decision                                                                                         |
| Social influence           | Heath, 2016, 27371883   | For some families, decision-making regarding surgery gave rise to conflicts. For example, one mother described herself as more agreeable to surgery than the child's father because, as the primary carer, she 'witnessed' the true extent of their child's seizures. In cases where the child's epilepsy was considered to impact on the whole family (e.g., where a parent could not return to work because of a need to look after the child), then, the decision was understood as a responsibility of the whole family                                                                                                                                                                                   | Family decision                                                                                         |
| Belief about consequences  | Baca, 2015, 25894906    | On their journey, many parents transformed their view of surgery from a scary, last resort treatment to a necessary and hopeful option. One mother explained, "By the time she got it—it got so serious I was looking toward that as being an answer to our prayers rather than just something that I couldn't even think about." This transformation occurred as parents became increasingly aware of the severity of their child's epilepsy and its impact on their child's and their future life. Although surgery remained scary, epilepsy was or became scarier than surgery. As some parents feared that their child would die from epilepsy, surgery was no longer perceived as an elective treatment. | Transformation towards surgery as the treatment choice informed by experiences, emotions, and knowledge |
| Beliefs about consequences | Baca, 2015, 25894906    | Many parents initially perceived epilepsy brain surgery to be "pretty horrific" and a treatment of "last resort."                                                                                                                                                                                                                                                                                                                                                                                                                                                                                                                                                                                             | Transformation towards surgery as the treatment choice informed by experiences, emotions, and knowledge |
| Beliefs about consequences | Baca, 2015, 25894906    | After an arduous journey, parents reached the right doctor and center; epilepsy surgery, although previously seen as a last ditch option, became a viable option and a source of hope.                                                                                                                                                                                                                                                                                                                                                                                                                                                                                                                        | Transformation towards surgery as the treatment choice informed by experiences, emotions, and knowledge |
| Beliefs about consequences | Pieters, 2016, 27521720 | After persevering through hard times with unsuccessful medications and interventions, they eventually decided to proceed with surgery, the option that they perceived to be the best treatment for the epilepsy.                                                                                                                                                                                                                                                                                                                                                                                                                                                                                              | Transformation towards surgery as the treatment choice informed by experiences, emotions, and knowledge |
| Beliefs about consequences | Pieters, 2016, 27521720 | Because surgery was viewed as a treatment of last resort for many parents, time was required to process the initial fear, make sense of the emotional information, and consider the factual risks and benefits in order to decide on surgery as the best option for their child. Reflecting on why it took longer than six years to get to surgery for her 9-year-old daughter, a mother said, "Of course you need to take a lot of time to think about it. It's very invasive.... I did as much research as I could about it, and talked to the doctor a lot about it, and I decided that that was her best chance of having a normal life in the future."                                                   | Transformation towards surgery as the treatment choice informed by experiences, emotions, and knowledge |

| TDF domain                 | Author, Year, PMID      | Extracted text <sup>A</sup>                                                                                                                                                                                                                                                                                                                                                                                                                                                                                                                                                                                                                                                                                                                                                                                                                                                                                                                                                                                                                                                                                                                                                                                                                                                                                                                                              | Theme                                                                                                   |
|----------------------------|-------------------------|--------------------------------------------------------------------------------------------------------------------------------------------------------------------------------------------------------------------------------------------------------------------------------------------------------------------------------------------------------------------------------------------------------------------------------------------------------------------------------------------------------------------------------------------------------------------------------------------------------------------------------------------------------------------------------------------------------------------------------------------------------------------------------------------------------------------------------------------------------------------------------------------------------------------------------------------------------------------------------------------------------------------------------------------------------------------------------------------------------------------------------------------------------------------------------------------------------------------------------------------------------------------------------------------------------------------------------------------------------------------------|---------------------------------------------------------------------------------------------------------|
| Beliefs about consequences | Pieters, 2016, 27521720 | Through internal processing, parents worked through the diverse emotions and large amount of information that they were receiving and gathering to move forward and thereby develop a greater understanding of their child's illness and prognosis in order to ultimately reach the point where surgery became the treatment of choice                                                                                                                                                                                                                                                                                                                                                                                                                                                                                                                                                                                                                                                                                                                                                                                                                                                                                                                                                                                                                                   | Transformation towards surgery as the treatment choice informed by experiences, emotions, and knowledge |
| Beliefs about consequences | Heath, 2016, 27371883   | Parents were clear that putting their child forward for epilepsy surgery was the best and right decision for their child, demonstrating a high level of satisfaction with the treatment outcome. However, initial perceptions of surgery were often negative, particularly if it was not a treatment option that had previously been considered or that professionals had indicated. Many parents described attending their child's clinic appointment expecting to talk about more conventional treatments (e.g., medication or diet), leading to them feeling surprised when surgery was raised for discussion. "We went originally to talk about the ketogenic diet and then the doctor said 'oh I think surgery's your best option' which came as a bit of a shock really because no one had ever mentioned the surgery before." (P5) "It actually came as a bit of a surprise to us that option, in that it was mentioned in a review visit, that maybe the time had come to look at the option of surgery but we weren't really aware of that option at that point so it came as quite a shock to us." (P6) While some parents took comfort from the possibility of an additional treatment pathway, others felt excluded from the decision to assess their child for surgical candidacy, leading to their feeling unable to participate in an informed discussion | Transformation towards surgery as the treatment choice informed by experiences, emotions, and knowledge |
| Beliefs about consequences | Heath, 2016, 27371883   | Some parents were unconvinced about the efficacy of surgery for reducing their child's seizures. Skepticism stemmed from their experience of other pharmacological and dietary treatments which had resulted in little improvement in seizure control. In weighing up treatment options, parents also discussed the side effects of alternative treatments. For example, medications were perceived to have a range of adverse side effects, whereas ketogenic diets were viewed as negatively affecting the child's ability to live a 'normal' life. "We thought about the effects of the medication if we chose to continue on the path of finding a different medication... but then how long would that have taken us? Like how long would it work for? Then it would develop, then how long 'til we have to find something else, with all the side-effects that can happen? I didn't want to put her through that as well." (P9)                                                                                                                                                                                                                                                                                                                                                                                                                                    | Balancing potential benefits of surgery with concerns of adverse effects                                |
| Beliefs about consequences | Heath, 2016, 27371883   | Balancing potential costs and benefits. When deliberating surgery, parents balanced their perceived necessity of the treatment in terms of how epilepsy currently affected and would, in the future, affect their child's quality of life, against concerns regarding the possibility of negative outcomes. In other words, parents weighed up the potential benefits of surgery such as freedom from seizures against what they understood as the risks, including cognitive impairments. "There was no quality of life for him; we had to do what was best. We were told of the risks of the surgery and we were told that actually this would be the best thing for him... we don't regret it, but it was, it's not an easy decision to take because you're worried about the risks of things."                                                                                                                                                                                                                                                                                                                                                                                                                                                                                                                                                                       | Balancing potential benefits of surgery with concerns of adverse effects                                |
| Beliefs about consequences | Sylvén, 2020, 32480305  | Some parents mentioned that while they would like seizure freedom, any reduction in seizures would be "welcome" and a clear improvement for their child and for the family in general.                                                                                                                                                                                                                                                                                                                                                                                                                                                                                                                                                                                                                                                                                                                                                                                                                                                                                                                                                                                                                                                                                                                                                                                   | Balancing potential benefits of surgery with concerns of adverse effects                                |
| Beliefs about consequences | Sylvén, 2020, 32480305  | Some parents mentioned complete freedom from medicine while others mentioned a reduction in AEDs. Parents believed a reduction in AEDs and associated adverse side effects of AEDs including "tiredness" would lead to a "normal life" for their child.                                                                                                                                                                                                                                                                                                                                                                                                                                                                                                                                                                                                                                                                                                                                                                                                                                                                                                                                                                                                                                                                                                                  | Balancing potential benefits of surgery with concerns of adverse effects                                |

| TDF domain                 | Author, Year, PMID     | Extracted text <sup>A</sup>                                                                                                                                                                                                                                                                                                                                                                                                                                                                                                                                                          | Theme                                                                    |
|----------------------------|------------------------|--------------------------------------------------------------------------------------------------------------------------------------------------------------------------------------------------------------------------------------------------------------------------------------------------------------------------------------------------------------------------------------------------------------------------------------------------------------------------------------------------------------------------------------------------------------------------------------|--------------------------------------------------------------------------|
| Beliefs about consequences | Sylvén, 2020, 32480305 | Many parents mentioned a desire for seizure freedom for their child after surgery. They wanted their child to be free from the “trouble” of seizures and everything that follows from seizures                                                                                                                                                                                                                                                                                                                                                                                       | Balancing potential benefits of surgery with concerns of adverse effects |
| Beliefs about consequences | Sylvén, 2020, 32480305 | They wanted that their child could do everything their friends could do like “play football, cycle, and swim independently”. Some parents mentioned that they wanted their child to be able to go back to school and have a “proper social life” while some parents referenced the future hoping that the child would be better placed to get a job and driving license as a result of surgery.                                                                                                                                                                                      | Balancing potential benefits of surgery with concerns of adverse effects |
| Beliefs about consequences | Sylvén, 2020, 32480305 | Parents mentioned the possibility that their child would experience “a change in personality” as a result of the surgery. They did not mention particular personality characteristics but feared that the child's personality would change for the worst                                                                                                                                                                                                                                                                                                                             | Balancing potential benefits of surgery with concerns of adverse effects |
| Beliefs about consequences | Sylvén, 2020, 32480305 | Some parents reported that they were concerned that surgery would lead to a loss of function including that language/speech would be negatively affected. This concern included a worry that the child would develop speech difficulties or that they would lose the ability to talk completely as a result of the surgery. Parents also mentioned concerns that their child would acquire motor difficulties or even be paralyzed as a result of the surgery. Parents were also worried that any loss of function would be irreversible after the surgery                           | Balancing potential benefits of surgery with concerns of adverse effects |
| Beliefs about consequences | Sylvén, 2020, 32480305 | The majority of parents mentioned concerns about possible complications that could occur during or soon after the surgical procedure                                                                                                                                                                                                                                                                                                                                                                                                                                                 | Balancing potential benefits of surgery with concerns of adverse effects |
| Beliefs about consequences | Sylvén, 2020, 32480305 | A small number of parents said that they had no concerns before the surgery. One parent said that they were not worried as “no concerns arose in the discussions with professionals” before the surgery                                                                                                                                                                                                                                                                                                                                                                              | Balancing potential benefits of surgery with concerns of adverse effects |
| Beliefs about consequences | Sylvén, 2020, 32480305 | The results of the current study suggest that parents frequently worry about that the child would lose skills or function, or complications would arise during surgery that could result in injury.                                                                                                                                                                                                                                                                                                                                                                                  | Balancing potential benefits of surgery with concerns of adverse effects |
| Beliefs about consequences | Heath, 2016, 27371883  | For all parents in this study, the perceived need of surgery outweighed the possible risks and side effects. “We thought this is going to be no life for him... He was on this diet which meant he couldn't go out with friends; he couldn't stay at friends' houses, all the things that other kids do, he couldn't do... and then he got these fits virtually every night and we thought... you know what, there is no decision to make, we gotta do it... We knew there were risks, we talked about them with [child] and he was frightened but he said no, we gotta do it.” (P3) | Only choice left                                                         |
| Beliefs about consequences | Heath, 2016, 27371883  | Last treatment of choice. For most parents, surgery was a last-resort treatment option that would only be considered following the exhaustion of all other options...Some parents felt that they had little alternative but to accept surgical intervention in order to provide their child with the best possible chance of improving their quality of life. “We felt it was our only option really in her having a more independent future.”                                                                                                                                       | Only choice left                                                         |
| Beliefs about consequences | Heath, 2016, 27371883  | “My husband and I walked out of the appointment saying we feel like we don't have a choice... we felt like it was the only choice we could make.”                                                                                                                                                                                                                                                                                                                                                                                                                                    | Only choice left                                                         |



| TDF domain                          | Author, Year, PMID      | Extracted text <sup>A</sup>                                                                                                                                                                                                                                                                                                                                                                                                                                                                                                                                                                                            | Theme                                            |
|-------------------------------------|-------------------------|------------------------------------------------------------------------------------------------------------------------------------------------------------------------------------------------------------------------------------------------------------------------------------------------------------------------------------------------------------------------------------------------------------------------------------------------------------------------------------------------------------------------------------------------------------------------------------------------------------------------|--------------------------------------------------|
| Beliefs about consequences          | Heath, 2016, 27371883   | For one family with an adolescent child, it was considered necessary to accept surgery while the child received care from the children's hospital as they believed that the treatment would become unavailable once transitioned to adult services.                                                                                                                                                                                                                                                                                                                                                                    | Only choice left                                 |
| Beliefs about consequences          | O'Brien, 2020, 33120326 | Parents described a process of weighing up the pros and cons based on the information provided by the medical team, which led to the decision to pursue surgery. Many perceived that surgery was the only hope "a simple decision" (Alex – mother), they were "in no doubt" (Lucy – mother) and that they "had no choice" (Jessica mother) as the health and wellbeing of their child would deteriorate or become more serious if surgery was not pursued. There was also a sense of 'not knowing' outcomes if surgery was not pursued. We felt we've got to do this because where is she going to end up if we don't? | Only choice left                                 |
| Beliefs about consequences          | O'Brien, 2020, 33120326 | Decision making – is there a choice? When asked what informed the decision-making process when considering the option of surgery as a treatment for epilepsy, parents discussed how the perceived risks to their child's safety, as well as the safety of others, were key factors. Even with all the risks, it wasn't going to be much worse than having a little girl that was unconscious all the time anyway.                                                                                                                                                                                                      | Only choice left                                 |
| Beliefs about consequences          | Ozanne, 2016, 27176878  | Parents felt that epilepsy surgery was a question of life or death, of chaos or control. It was terrifying to see the child so ill. The epilepsy was uncontrolled, and drugs gave side effects. Parents felt that there was no alternative to surgery. However, it was a difficult decision since they did not know the outcome.                                                                                                                                                                                                                                                                                       | Only choice left                                 |
| Beliefs about consequences          | Ozanne, 2016, 27176878  | Information about possible complications related to surgery did not prevent the parents from wishing to proceed with the operation. They preferred to take a risk rather than live in constant fear                                                                                                                                                                                                                                                                                                                                                                                                                    | Only choice left                                 |
| Environmental context and resources | Baca, 2015, 25894906    | The journey to finding the right doctor was further complicated by parental perceptions that doctors sometimes lacked knowledge of or familiarity with epilepsy. Many parents went to numerous doctors searching for the "right" doctor, or one who had a strong epilepsy knowledge base, could effectively identify the problem, and then make a clear plan of action                                                                                                                                                                                                                                                 | Challenges with navigating the healthcare system |
| Environmental context and resources | Baca, 2015, 25894906    | Parents expressed that their children were seen, evaluated, and cared for by a variety of doctors of different specialties throughout their journey. Parents frequently described difficulty finding the "right" doctor(s). Difficulty was associated with a lack of pediatric neurologists in their local area and with different doctors having different recommendations.                                                                                                                                                                                                                                           | Challenges with navigating the healthcare system |
| Environmental context and resources | Baca, 2015, 25894906    | Parents depicted a pathway filled with multiple doctors and treatments, insurance battles, and work and life obstacles as they sought a cure for their child's seizures, becoming ever more knowledgeable about epilepsy                                                                                                                                                                                                                                                                                                                                                                                               | Challenges with navigating the healthcare system |
| Environmental context and resources | Pieters, 2016, 27521720 | Further, finding the best clinicians for the needs of their child required an understanding of the relationship between different medical (sub)-specialties and thereby represented dual and concurrent use of processing and navigating mechanisms                                                                                                                                                                                                                                                                                                                                                                    | Challenges with navigating the healthcare system |
| Environmental context and resources | Pieters, 2016, 27521720 | The second mechanism, navigating, was when the parents kept and directed their way along their journey often through uncharted territory as they steered through various aspects of the healthcare system and learned about epilepsy itself and its various treatments.                                                                                                                                                                                                                                                                                                                                                | Challenges with navigating the healthcare system |

| TDF domain                          | Author, Year, PMID      | Extracted text <sup>A</sup>                                                                                                                                                                                                                                                                                                                                                                                                                                                                                                                                                                | Theme                                            |
|-------------------------------------|-------------------------|--------------------------------------------------------------------------------------------------------------------------------------------------------------------------------------------------------------------------------------------------------------------------------------------------------------------------------------------------------------------------------------------------------------------------------------------------------------------------------------------------------------------------------------------------------------------------------------------|--------------------------------------------------|
| Environmental context and resources | Pieters, 2016, 27521720 | A mother described her disappointment with being denied by insurance despite doing all the work that was required                                                                                                                                                                                                                                                                                                                                                                                                                                                                          | Challenges with navigating the healthcare system |
| Environmental context and resources | Pieters, 2016, 27521720 | "We'd already been fighting her seizures for two and a half, approaching three years, and because we were new there and per protocol, they wanted to try these other treatments for another year."                                                                                                                                                                                                                                                                                                                                                                                         | Challenges with navigating the healthcare system |
| Environmental context and resources | Ozanne, 2016, 27176878  | The Swedish Social Insurance Agency, technical aids center, school, and municipality were criticized by the parents. Based on their experience, they felt that the bureaucracy had been problematic and had taken a great deal of time. They had to fight for their rights, despite physicians' certificates. Without specific diagnoses of comorbidities, it was even more difficult to get adequate support. They thought that it would be helpful if the authorities understood that parents only asked for help when they had reached their limit, and then, urgent help was necessary | Challenges with navigating the healthcare system |
| Environmental context and resources | Ozanne, 2016, 27176878  | Parents were disappointed if it took a long time to get a correct diagnosis                                                                                                                                                                                                                                                                                                                                                                                                                                                                                                                | Challenges with navigating the healthcare system |
| Environmental context and resources | Baca, 2015, 25894906    | Several parents experienced feeling doubted by a doctor; some were told that nothing was wrong with their child initially                                                                                                                                                                                                                                                                                                                                                                                                                                                                  | Interactions with providers (barriers)           |
| Environmental context and resources | Baca, 2015, 25894906    | As parents learned that surgery was a potential viable option for their child, they "hoped" for candidacy. This hoping required persistence and sometimes disregarding doctors who initially felt surgery was not an option. Looking back, one father voiced happiness that he listened to his parental instincts rather than the opinion of one doctor. He (doctor) said, "I don't believe that she is a surgical candidate.' As a parent, I listened and I wanted to think otherwise.... In hindsight, I'm glad I didn't listen to him."                                                 | Interactions with providers (barriers)           |
| Environmental context and resources | Baca, 2015, 25894906    | Parents also reported notable physician-based barriers including variability in perceived knowledge of epilepsy, criteria for presurgical referral and appropriateness of epilepsy surgery                                                                                                                                                                                                                                                                                                                                                                                                 | Interactions with providers (barriers)           |
| Environmental context and resources | Pieters, 2016, 27521720 | [C]rossing such an information divide was an uphill battle as stated by a mother who described feeling dismissed by doctors until she found someone who was approachable and was "gracious enough to talk to a mere mortal mother on the phone ... because a lot of docs won't, they've got lots of protective armor around them shielding off potential patients or worse yet parents."                                                                                                                                                                                                   | Interactions with providers (barriers)           |
| Environmental context and resources | Heath, 2016, 27371883   | Parents perceived a lack of control over the decision-making process through their limited involvement in initial discussions regarding surgical candidacy                                                                                                                                                                                                                                                                                                                                                                                                                                 | Interactions with providers (barriers)           |
| Environmental context and resources | Heath, 2016, 27371883   | These included earlier and softer introduction of surgery as a possible treatment option                                                                                                                                                                                                                                                                                                                                                                                                                                                                                                   | Interactions with providers (barriers)           |
| Environmental context and resources | Ozanne, 2016, 27176878  | During the long hospitalizations, some parents felt that nobody had time for them. Arrogance of some professionals made them very disappointed                                                                                                                                                                                                                                                                                                                                                                                                                                             | Interactions with providers (barriers)           |

| TDF domain                          | Author, Year, PMID      | Extracted text <sup>A</sup>                                                                                                                                                                                                                                                                                                                                                                 | Theme                                      |
|-------------------------------------|-------------------------|---------------------------------------------------------------------------------------------------------------------------------------------------------------------------------------------------------------------------------------------------------------------------------------------------------------------------------------------------------------------------------------------|--------------------------------------------|
| Environmental context and resources | Ozanne, 2016, 27176878  | If the pediatric neurologists revealed their own worries and insecurities regarding epilepsy surgery, this could have negative effects                                                                                                                                                                                                                                                      | Interactions with providers (barriers)     |
| Environmental context and resources | Ozanne, 2016, 27176878  | Parents described that support and information were inadequate before the epilepsy was recognized to be drug-resistant, especially from the local hospital. Their concerns were not taken seriously                                                                                                                                                                                         | Interactions with providers (barriers)     |
| Environmental context and resources | Ozanne, 2016, 27176878  | The support and information went from poor to strong when specialists at the university hospitals were involved                                                                                                                                                                                                                                                                             | Interactions with providers (facilitators) |
| Environmental context and resources | Ozanne, 2016, 27176878  | The pediatric neurologist's worry and sympathy for the family could also strengthen them since they felt invited and could be insecure together                                                                                                                                                                                                                                             | Interactions with providers (facilitators) |
| Environmental context and resources | Ozanne, 2016, 27176878  | Trust and safety characterized the relations to the pediatric neurologists and specialist nurses. It strengthened parents' trust to see that the pediatric neurologist fought for the child and that the parents' opinions counted in the decision process. Parents appreciated continuous contact.                                                                                         | Interactions with providers (facilitators) |
| Environmental context and resources | Pieters, 2016, 27521720 | Trust in the information that they received was greater when their child was in the hands of a team with different expertise, as exemplified by the mother who said, "They get all the doctors together to look at all the information ... that felt a lot more helpful because if we were at a different hospital and you only had the one doctor, then they would have misdiagnosed him." | Interactions with providers (facilitators) |
| Environmental context and resources | Pieters, 2016, 27521720 | When parents finally reached a comprehensive center to seek evaluation for potential pediatric epilepsy surgery, they recognized the importance of having a medical team of experts                                                                                                                                                                                                         | Interactions with providers (facilitators) |

<sup>A</sup>Study participant (first order statement) or study author (second order statement). We kept original spelling from primary study.

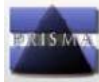

## PRISMA 2020 Checklist

| Section and Topic             | Item # | Checklist item                                                                                                                                                                                                                                                                                       | Location where item is reported |
|-------------------------------|--------|------------------------------------------------------------------------------------------------------------------------------------------------------------------------------------------------------------------------------------------------------------------------------------------------------|---------------------------------|
| <b>TITLE</b>                  |        |                                                                                                                                                                                                                                                                                                      |                                 |
| Title                         | 1      | Identify the report as a systematic review.                                                                                                                                                                                                                                                          | Title page                      |
| <b>ABSTRACT</b>               |        |                                                                                                                                                                                                                                                                                                      |                                 |
| Abstract                      | 2      | See the PRISMA 2020 for Abstracts checklist.                                                                                                                                                                                                                                                         |                                 |
| <b>INTRODUCTION</b>           |        |                                                                                                                                                                                                                                                                                                      |                                 |
| Rationale                     | 3      | Describe the rationale for the review in the context of existing knowledge.                                                                                                                                                                                                                          | Background, pg 3                |
| Objectives                    | 4      | Provide an explicit statement of the objective(s) or question(s) the review addresses.                                                                                                                                                                                                               | Pg 3                            |
| <b>METHODS</b>                |        |                                                                                                                                                                                                                                                                                                      |                                 |
| Eligibility criteria          | 5      | Specify the inclusion and exclusion criteria for the review and how studies were grouped for the syntheses.                                                                                                                                                                                          | Pg 3-4                          |
| Information sources           | 6      | Specify all databases, registers, websites, organisations, reference lists and other sources searched or consulted to identify studies. Specify the date when each source was last searched or consulted.                                                                                            | Pg 3, Appendix A                |
| Search strategy               | 7      | Present the full search strategies for all databases, registers and websites, including any filters and limits used.                                                                                                                                                                                 | Appendix A                      |
| Selection process             | 8      | Specify the methods used to decide whether a study met the inclusion criteria of the review, including how many reviewers screened each record and each report retrieved, whether they worked independently, and if applicable, details of automation tools used in the process.                     | Pg 4-5                          |
| Data collection process       | 9      | Specify the methods used to collect data from reports, including how many reviewers collected data from each report, whether they worked independently, any processes for obtaining or confirming data from study investigators, and if applicable, details of automation tools used in the process. | Pg 4-5                          |
| Data items                    | 10a    | List and define all outcomes for which data were sought. Specify whether all results that were compatible with each outcome domain in each study were sought (e.g. for all measures, time points, analyses), and if not, the methods used to decide which results to collect.                        | Pg 4-5                          |
|                               | 10b    | List and define all other variables for which data were sought (e.g. participant and intervention characteristics, funding sources). Describe any assumptions made about any missing or unclear information.                                                                                         | Pg 4-5                          |
| Study risk of bias assessment | 11     | Specify the methods used to assess risk of bias in the included studies, including details of the tool(s) used, how many reviewers assessed each study and whether they worked independently, and if applicable, details of automation tools used in the process.                                    | Pg 4-5                          |
| Effect measures               | 12     | Specify for each outcome the effect measure(s) (e.g. risk ratio, mean difference) used in the synthesis or presentation of results.                                                                                                                                                                  | NA                              |
| Synthesis methods             | 13a    | Describe the processes used to decide which studies were eligible for each synthesis (e.g. tabulating the study intervention characteristics and comparing against the planned groups for each synthesis (item #5)).                                                                                 | Pg 4-5, Table 1                 |
|                               | 13b    | Describe any methods required to prepare the data for presentation or synthesis, such as handling of missing summary statistics, or data conversions.                                                                                                                                                | Pg 4-5                          |
|                               | 13c    | Describe any methods used to tabulate or visually display results of individual studies and syntheses.                                                                                                                                                                                               | Pg 4-5                          |
|                               | 13d    | Describe any methods used to synthesize results and provide a rationale for the choice(s). If meta-analysis was performed, describe the model(s), method(s) to identify the presence and extent of statistical heterogeneity, and software package(s) used.                                          | Pg 4-5                          |
|                               | 13e    | Describe any methods used to explore possible causes of heterogeneity among study results (e.g. subgroup analysis, meta-regression).                                                                                                                                                                 | Pg 4-5                          |
|                               | 13f    | Describe any sensitivity analyses conducted to assess robustness of the synthesized results.                                                                                                                                                                                                         | NA                              |
| Reporting bias assessment     | 14     | Describe any methods used to assess risk of bias due to missing results in a synthesis (arising from reporting biases).                                                                                                                                                                              | Pg 4-5< Appendix D              |



## PRISMA 2020 Checklist

| Section and Topic                              | Item # | Checklist item                                                                                                                                                                                                                                                                       | Location where item is reported |
|------------------------------------------------|--------|--------------------------------------------------------------------------------------------------------------------------------------------------------------------------------------------------------------------------------------------------------------------------------------|---------------------------------|
| Certainty assessment                           | 15     | Describe any methods used to assess certainty (or confidence) in the body of evidence for an outcome.                                                                                                                                                                                | Pg. 4-5, Table 2                |
| <b>RESULTS</b>                                 |        |                                                                                                                                                                                                                                                                                      |                                 |
| Study selection                                | 16a    | Describe the results of the search and selection process, from the number of records identified in the search to the number of studies included in the review, ideally using a flow diagram.                                                                                         | Pg 5                            |
|                                                | 16b    | Cite studies that might appear to meet the inclusion criteria, but which were excluded, and explain why they were excluded.                                                                                                                                                          | Pg 5                            |
| Study characteristics                          | 17     | Cite each included study and present its characteristics.                                                                                                                                                                                                                            | Pg 5, Table 1                   |
| Risk of bias in studies                        | 18     | Present assessments of risk of bias for each included study.                                                                                                                                                                                                                         | Appendix D                      |
| Results of individual studies                  | 19     | For all outcomes, present, for each study: (a) summary statistics for each group (where appropriate) and (b) an effect estimate and its precision (e.g. confidence/credible interval), ideally using structured tables or plots.                                                     | Table 2                         |
| Results of syntheses                           | 20a    | For each synthesis, briefly summarise the characteristics and risk of bias among contributing studies.                                                                                                                                                                               | Pg 5                            |
|                                                | 20b    | Present results of all statistical syntheses conducted. If meta-analysis was done, present for each the summary estimate and its precision (e.g. confidence/credible interval) and measures of statistical heterogeneity. If comparing groups, describe the direction of the effect. | Pg 6-8                          |
|                                                | 20c    | Present results of all investigations of possible causes of heterogeneity among study results.                                                                                                                                                                                       | Pg 6-8                          |
|                                                | 20d    | Present results of all sensitivity analyses conducted to assess the robustness of the synthesized results.                                                                                                                                                                           | NA                              |
| Reporting biases                               | 21     | Present assessments of risk of bias due to missing results (arising from reporting biases) for each synthesis assessed.                                                                                                                                                              | NA                              |
| Certainty of evidence                          | 22     | Present assessments of certainty (or confidence) in the body of evidence for each outcome assessed.                                                                                                                                                                                  | Pg 6-8, Table 2                 |
| <b>DISCUSSION</b>                              |        |                                                                                                                                                                                                                                                                                      |                                 |
| Discussion                                     | 23a    | Provide a general interpretation of the results in the context of other evidence.                                                                                                                                                                                                    | Pg 9                            |
|                                                | 23b    | Discuss any limitations of the evidence included in the review.                                                                                                                                                                                                                      | Pg 10                           |
|                                                | 23c    | Discuss any limitations of the review processes used.                                                                                                                                                                                                                                | Pg 10                           |
|                                                | 23d    | Discuss implications of the results for practice, policy, and future research.                                                                                                                                                                                                       | Pg 9-10                         |
| <b>OTHER INFORMATION</b>                       |        |                                                                                                                                                                                                                                                                                      |                                 |
| Registration and protocol                      | 24a    | Provide registration information for the review, including register name and registration number, or state that the review was not registered.                                                                                                                                       | Not registered                  |
|                                                | 24b    | Indicate where the review protocol can be accessed, or state that a protocol was not prepared.                                                                                                                                                                                       | NA                              |
|                                                | 24c    | Describe and explain any amendments to information provided at registration or in the protocol.                                                                                                                                                                                      | NA                              |
| Support                                        | 25     | Describe sources of financial or non-financial support for the review, and the role of the funders or sponsors in the review.                                                                                                                                                        | Pg 11                           |
| Competing interests                            | 26     | Declare any competing interests of review authors.                                                                                                                                                                                                                                   | Pg 11                           |
| Availability of data, code and other materials | 27     | Report which of the following are publicly available and where they can be found: template data collection forms; data extracted from included studies; data used for all analyses; analytic code; any other materials used in the review.                                           | Pg 11                           |

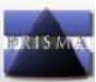

# PRISMA 2020 Checklist

- 1
- 2
- 3
- 4
- 5
- 6
- 7
- 8
- 9
- 10
- 11
- 12
- 13
- 14
- 15
- 16
- 17
- 18
- 19
- 20
- 21
- 22
- 23
- 24
- 25
- 26
- 27
- 28
- 29
- 30
- 31
- 32
- 33
- 34
- 35
- 36
- 37
- 38
- 39
- 40
- 41
- 42
- 43
- 44
- 45
- 46
- 47

From: Page MJ, McKenzie JE, Bossuyt PM, Boutron I, Hoffmann TC, Mulrow CD, et al. The PRISMA 2020 statement: an updated guideline for reporting systematic reviews. *BMJ* 2021;372:n71. doi: 10.1136/bmj.n71  
 For more information, visit: <http://www.prisma-statement.org/>

For peer review only

# BMJ Open

## Parent perceptions and decision-making about treatments for epilepsy: a qualitative evidence synthesis

|                                 |                                                                                                                                                                                                                                                                                                                                                                     |
|---------------------------------|---------------------------------------------------------------------------------------------------------------------------------------------------------------------------------------------------------------------------------------------------------------------------------------------------------------------------------------------------------------------|
| Journal:                        | <i>BMJ Open</i>                                                                                                                                                                                                                                                                                                                                                     |
| Manuscript ID                   | bmjopen-2022-066872.R2                                                                                                                                                                                                                                                                                                                                              |
| Article Type:                   | Original research                                                                                                                                                                                                                                                                                                                                                   |
| Date Submitted by the Author:   | 15-Jan-2023                                                                                                                                                                                                                                                                                                                                                         |
| Complete List of Authors:       | Uhl, Stacey; ECRI, Center for Clinical Evidence<br>Konnyu, Kristin; Brown University School of Public Health, Center for Evidence Synthesis<br>Wilson, Renee; Johns Hopkins University, School of Public Health<br>Adam, Gaelen; Brown University,<br>Robinson, Karen; Johns Hopkins University, School of Public Health<br>Viswanathan, Meera ; RTI International, |
| <b>Primary Subject Heading</b>: | Neurology                                                                                                                                                                                                                                                                                                                                                           |
| Secondary Subject Heading:      | Qualitative research                                                                                                                                                                                                                                                                                                                                                |
| Keywords:                       | QUALITATIVE RESEARCH, Epilepsy < NEUROLOGY, NEUROSURGERY, Paediatric neurology < PAEDIATRICS                                                                                                                                                                                                                                                                        |
|                                 |                                                                                                                                                                                                                                                                                                                                                                     |

SCHOLARONE™  
Manuscripts



I, the Submitting Author has the right to grant and does grant on behalf of all authors of the Work (as defined in the below author licence), an exclusive licence and/or a non-exclusive licence for contributions from authors who are: i) UK Crown employees; ii) where BMJ has agreed a CC-BY licence shall apply, and/or iii) in accordance with the terms applicable for US Federal Government officers or employees acting as part of their official duties; on a worldwide, perpetual, irrevocable, royalty-free basis to BMJ Publishing Group Ltd ("BMJ") its licensees and where the relevant Journal is co-owned by BMJ to the co-owners of the Journal, to publish the Work in this journal and any other BMJ products and to exploit all rights, as set out in our [licence](#).

The Submitting Author accepts and understands that any supply made under these terms is made by BMJ to the Submitting Author unless you are acting as an employee on behalf of your employer or a postgraduate student of an affiliated institution which is paying any applicable article publishing charge ("APC") for Open Access articles. Where the Submitting Author wishes to make the Work available on an Open Access basis (and intends to pay the relevant APC), the terms of reuse of such Open Access shall be governed by a Creative Commons licence – details of these licences and which [Creative Commons](#) licence will apply to this Work are set out in our licence referred to above.

Other than as permitted in any relevant BMJ Author's Self Archiving Policies, I confirm this Work has not been accepted for publication elsewhere, is not being considered for publication elsewhere and does not duplicate material already published. I confirm all authors consent to publication of this Work and authorise the granting of this licence.



1  
2  
3 **Parent perceptions and decision-making about treatments for epilepsy: a qualitative evidence**  
4 **synthesis**  
5

6 Stacey Uhl, MS<sup>\*a</sup>; Kristin J. Konnyu, PhD<sup>\*b</sup>; Renee Wilson, MS<sup>c</sup>; Gaelen P. Adam<sup>b</sup>, MLIS MPH; Karen  
7 A. Robinson, PhD<sup>d</sup>; Meera Viswanathan, PhD<sup>e</sup>  
8  
9

10  
11 <sup>a</sup> Center for Clinical Evidence and Guidelines, ECRI, Plymouth Meeting, PA, USA  
12

13 <sup>b</sup>Center for Evidence Synthesis in Health, Department of Health Services, Policy, and Practice,  
14 Brown University School of Public Health, Providence, RI, USA  
15

16  
17 <sup>c</sup>Department of Health Policy and Management, School of Public Health, Johns Hopkins  
18 University, Baltimore, MD, USA  
19

20 <sup>d</sup>Department of Medicine, Johns Hopkins University School of Medicine, Baltimore, MD. USA  
21

22  
23 <sup>e</sup>Evidence-based Practice Center, RTI International–University of North Carolina at Chapel Hill,  
24 Chapel Hill, NC, USA  
25

26  
27 Correspondence to:

28 Stacey Uhl

29 Center for Clinical Evidence and Guidelines, ECRI, Plymouth Meeting, PA, USA

30 suhl@ecri.org  
31  
32

33  
34 <sup>\*</sup>Stacey Uhl and Kristin Konnyu contributed equally to the writing of this manuscript  
35  
36  
37  
38  
39  
40  
41  
42  
43  
44  
45  
46  
47  
48  
49  
50  
51  
52  
53  
54  
55  
56  
57  
58  
59  
60

## Abstract

**Objectives** Epilepsy treatment decision-making is complex and understanding what informs caregiver decision making about treatment for childhood epilepsy is crucial to better support caregivers and their children. We synthesized evidence on caregivers' perspectives and experiences of treatments for childhood epilepsy.

**Design** Systematic review of qualitative studies using a best-fit framework and Grading of Recommendations Assessment, Development, and Evaluation Confidence in the Evidence from Reviews of Qualitative Research (GRADE-CERQual) approach.

**Data sources** Searched Embase, PubMed, CINAHL, PsycINFO, SocINDEX, and Web of Science from January 1, 1999, to August 19, 2021.

**Eligibility criteria** We included qualitative studies examining caregiver's perspectives on anti-seizure medication, diet, or surgical treatments for childhood epilepsy. We excluded studies not reported in English.

**Data extraction and synthesis** We extracted qualitative evidence into one of 14 domains defined by the Theoretical Domains Framework (TDF). One reviewer extracted study data and methodological characteristics, and two reviewers extracted qualitative findings. The team verified all extractions. We identified themes within TDF domains and synthesized summary statements of these themes. We assessed our confidence in our summary statements using GRADE-CERQual.

**Results** We identified five studies (in six reports) of good methodological quality focused on parent perceptions of neurosurgery; we found limited indirect evidence on parents' perceptions of medications or diet. We identified themes within six of the 14 TDF domains relevant to treatment decisions: knowledge, emotion; social/professional role and identity; social influence; beliefs about consequences; and environmental context and resources.

**Conclusions** Parents of children with epilepsy navigate a complex process to decide whether to have their child undergo surgery. Educational resources, peer support, and patient navigators may help support parents through this process. More qualitative studies are needed on non-surgical treatments for epilepsy and among caregivers from different cultural and socio-economic backgrounds to fully understand the diversity of perspectives that informs treatment decision-making.

## Strengths and limitations of this study

- This synthesis followed contemporary standards for the conduct of qualitative synthesis, which includes using a best-fit framework approach to categorize and synthesize findings based on the Theoretical Domains Framework (TDF).
- Risks to rigor of included studies were assessed using the Critical Appraisal Skills Programme (CASP) tool for qualitative studies.
- Confidence in the conclusions drawn from this synthesis was rated using the Grading of Recommendations Assessment, Development, and Evaluation Confidence in the Evidence from Reviews of Qualitative Research (GRADE CERQual).
- As with all qualitative synthesis, selecting which data to extract and how to code it is ultimately a subjective process.
- This synthesis was limited to studies that examined parents' perceptions, experiences, and decision-making about pursuing surgery to treat their child's epilepsy.

## Introduction

Epilepsy is a common neurologic disorder in children, affecting about 1% of children in the United States.<sup>1</sup> While there are different types of childhood epilepsy, each type involves recurring seizures caused by abnormal electrical activity in the brain. Epilepsy is categorized by seizure type (e.g., focal, generalized, or unknown), epilepsy type (e.g., focal, generalized, unknown), and syndrome type (e.g., childhood absence epilepsy, Dravet syndrome).<sup>2-4</sup> No matter the type, epilepsy is a chaotic and unpredictable condition for both the affected children and their caregivers.<sup>5</sup>

Treatment and ongoing management approaches depend on the type of the epilepsy and prior treatment response. Treatment options for childhood epilepsy include anti-seizure medications (ASMs), ketogenic diets, or surgery. Although many children with new-onset epilepsy achieve seizure freedom with ASMs,<sup>6</sup> these drugs are associated with numerous adverse effects (e.g., tiredness, nausea, headache, difficulty concentrating, depression, and suicidal ideation).<sup>7</sup> Furthermore, about 20% of children continue to experience seizures despite drug treatment.<sup>8</sup> The effectiveness of ketogenic diets (e.g., Atkins diet) is supported by low quality evidence.<sup>9</sup> However, these diets are also associated with adverse effects (e.g., gastrointestinal symptoms, dyslipidemia, decreased growth, and kidney stones), and require considerable caregiver effort to maintain. Surgical interventions may isolate and remove the underlying neurological cause of seizures, but carry risks of bleeding, infection, hydrocephalus, and new neurologic deficits.

Epilepsy treatment decision-making is thus complex and needs to consider each child's unique form of epilepsy, evidence of each treatment's potential benefits and harms, previous or ongoing experiences with treatment(s), and family's values and preferences. Although studies of treatment effectiveness rarely explore how families navigate these complex considerations or how these considerations may evolve over time, qualitative studies can offer context on caregiver experiences and decision-making. Syntheses of these qualitative studies can help shape caregiver and healthcare provider interactions and inform shared decision-making tools and processes. The purpose of this review is to summarize the qualitative research regarding caregivers' perspectives and experiences of treatments for childhood epilepsy.

## Methods

We conducted a qualitative evidence synthesis in accordance with standards for qualitative evidence syntheses.<sup>10-12</sup>

### Data sources and searches

We searched EMBASE, PubMed (in process), CINAHL, PsycINFO, SocINDEX, and Web of Science for studies published from January 1, 1999, to August 19, 2021, using terms related to epilepsy, treatments, and caregiver perspectives (Appendix A). The search was limited to English-language. We also ran forward and backward citation searches (i.e., snowball searching) on included studies to ensure relevant studies were not missed.

### Study selection

We included qualitative studies that sought to understand caregiver's perspectives on ASMs, diet, or surgical treatments for childhood epilepsy. Studies needed to use qualitative methods for both data collection (e.g., focus group, individual interviews, or open-ended survey questions) and data analysis (e.g., thematic analysis). We excluded studies that focused only on non-caregiver perceptions (e.g., patient or healthcare provider) or that focused only on caregiver stress or caregiver expectations of treatment. We did not restrict by study country or care setting.

1  
2  
3 One reviewer screened titles and abstracts of citations retrieved from searches for eligibility.  
4 Two independent reviewers screened the full text of potentially relevant citations in PICO  
5 Portal<sup>®</sup> (<https://picoportal.org/>). Disagreements were resolved through discussion of the full  
6 team.  
7

### 8 **Data extraction and quality assessment**

9 For each study, we extracted details on the study design and methodological features, population  
10 characteristics, and qualitative analysis findings.

11 One reviewer assessed risks to rigor using the Critical Appraisal Skills Programme (CASP)  
12 tool for qualitative studies, which appraises research aims, congruence between research aims  
13 and methodological approach, quality of sampling and data collection, appropriateness of  
14 application of methods, richness and conceptual depth of findings, appropriateness of  
15 interrogation of findings, and researcher reflexivity.<sup>13</sup> All team members reviewed the CASP  
16 assessments to ensure consistency of ratings across studies.

17 Two team members independently extracted and coded the qualitative findings of the  
18 included studies in MaxQDA<sup>®</sup> 2020 (Berlin, Germany), an online platform designed to support  
19 qualitative data management, extraction, and analysis. The extracted data included direct quotes  
20 from the participants (first order statements) and summary statements written by the study  
21 authors (second order statements). Extracted data were imported into spreadsheets to facilitate  
22 data cleaning, confirmation of themes, and synthesis.

23 To categorize the extracted data, we used the Theoretical Domains Framework (TDF),<sup>14, 15</sup>  
24 which was developed to assist in identifying the cognitive, affective, social, and environmental  
25 factors that may influence an individuals' performance of a health behavior. The health behavior  
26 of interest for this review was the decision to pursue an epileptic treatment. The 14 domains  
27 include: knowledge; skills; social/professional role and identity; belief about capabilities;  
28 optimism; beliefs about consequences; reinforcement; intention; goals; memory, attention, and  
29 decision processes; environmental context and resources; social influences; emotion and  
30 behavioral regulation (Appendix B). A third reviewer confirmed TDF domain codes, and the  
31 team discussed the coding to ensure accuracy and consistency both within and across TDF  
32 domains. One reviewer did a final confirmation of extracted text and coding to ensure no data  
33 were missed and that there was consistency across domains.  
34  
35  
36  
37  
38

### 39 **Data synthesis and analysis**

40 We adopted a best-fit framework approach to guide our qualitative synthesis. In this approach,  
41 data are coded according to TDF domains. One reviewer then summarized key themes within  
42 each TDF domain. Themes were discussed and debated among the team until consensus was  
43 achieved. We used the finalized themes to develop summary statements and assessed our  
44 confidence in these statements using Grading of Recommendations Assessment, Development,  
45 and Evaluation Confidence in the Evidence from Reviews of Qualitative Research (GRADE-  
46 CERQual).<sup>16-18</sup> We rated our confidence in the summary statements as either high, moderate,  
47 low, or very low based on our assessment of the four GRADE-CERQual domains:  
48 methodological limitations, relevance, coherence, and adequacy of the data (Appendix C for  
49 definition of domains). "High confidence" refers to a finding that is highly likely to be a  
50 reasonable representation of the phenomenon of interest, whereas "very low confidence" refers  
51 to a review finding in which it was unclear if the finding was a reasonable representation.  
52  
53

### 54 **Patient and public involvement**

55 None.  
56  
57

## Results

The literature search yielded 1,447 citations from searches (see PRISMA flow diagram, Figure 1). We found 66 citations to retrieve for full-text screening of which five studies (in six publications) were included in the final sample.<sup>19-24</sup> Table 1 presents characteristics of included studies.

All studies examined parents' perceptions, experiences, and decision-making leading to surgery. All studies were conducted after the children had undergone surgery, with one study also surveying parents "just prior" to surgery.<sup>24</sup> Three studies reported data on parents' perceptions and experiences with medications and diet, but only in the context of selecting surgery (e.g., parents considering surgery due to the undesirable side effects or uncontrolled epilepsy with prior treatments).<sup>19, 21, 24</sup> In total, the views of 186 parents are represented in the five studies (the majority of whom were mothers, n=115). The time from children's surgery to data collection ranged from 6 months to 10 years among the three studies reporting on timing. Four studies collected parent perspectives through semi-structured interviews conducted in-person or over the telephone (length ranging from 10 to 75 minutes),<sup>19-23</sup> and one study captured parent perceptions through open-ended survey questions.<sup>24</sup>

All studies were assessed to have minor risk to rigor (Appendix D) due to the retrospective nature of recruitment and the lack of consideration (or reporting) of the relationship between researchers and participants. Otherwise, studies were considered appropriate in their use of qualitative design, methods of data collection, and analysis. The retrospective nature of the included studies raises concerns about recall bias, as surgical outcomes may have affected retrospective perceptions, and selection bias since studies only included parents of children who were referred to surgery and proceeded with surgery (and possibly experienced some level of success with surgery). All but one study<sup>23</sup> did not report whether interviewers were part of the child's care team, which may have influenced responses. Ozanne et al. reported that the researchers that interviewed parents and analyzed the data were not part of the epilepsy surgery team.<sup>23</sup>

We identified and coded data for six of the 14 TDF domains: knowledge; emotion; social/professional role and identity; social influence; beliefs about consequences; and environmental context and resources (Figure 2). We did not find evidence from extracted qualitative data for the remaining eight TDF domains. Appendix E provides the extracted text from studies linked to their synthesized themes.

The GRADE-CERQual table (Table 2) summarizes findings and conclusions for each TDF domain. We had no or minor concerns with the coherence of the findings (i.e., the synthesized findings reflect the complexity and variation of the data) or their relevance (i.e., the extent to which synthesized findings are applicable to the context specified in the review question). We had minor or moderate concerns with the adequacy (i.e., the degree of richness and quantity of the data supporting the synthesized finding) of the findings related to knowledge and environmental context and resources, respectively. Below, we report the summary statement (and associated GRADE-CERQual level of confidence) under each identified TDF domain and summarize the key themes that contributed to the statements.

### TDF Domain 1: Knowledge

**Summary statement:** *Evidence from four studies indicated that caregivers value information about epilepsy, its treatment options, and navigating the healthcare system to access timely and effective treatment for their child. Despite feeling overwhelmed by the complexity and sometimes*

1  
2  
3 *contradictory information, caregivers value learning this new language so they can become*  
4 *better advocates for their child (Moderate confidence)*<sup>19-23</sup>

5 Once parents recognized “something [was] wrong” with the health of their child, they sought  
6 information from multiple sources “to understand seizures and epilepsy and become better  
7 advocates for their child.”<sup>19</sup> Parents wanted information about medications,<sup>19</sup> surgery,<sup>19, 21</sup> and  
8 what types of doctors were needed to care for their child.<sup>20</sup> They also noted needing to learn  
9 about how to navigate the health system including multiple specialties, hospitals, and insurance  
10 procedures.<sup>19</sup>

11 Parents often perceived the information they received from professionals as inadequate to  
12 make informed decisions.<sup>21</sup> They described seeking lay language information from multiple  
13 sources, including additional professionals, the internet, books, family, friends, and other  
14 parents.<sup>19, 23</sup> Parents expressed discomfort in the “lack of understandable information” and  
15 “information imbalance” between themselves and their child’s providers and sought to become  
16 “epilepsy experts in order to be effective advocates for their children.”<sup>20</sup> After increasing their  
17 knowledge, parents felt more empowered to ask questions and participate more actively in the  
18 decision-making.<sup>19, 21</sup> Parents thus described active learning to ensure productive information  
19 exchanges with providers (including using clinical terms) to support a positive shared-decision  
20 making process.<sup>20</sup>

## 21 **TDF Domain 2: Social role and identity**

22 **Summary statement:** *Evidence from one study indicated that caregivers feel a sense of duty and*  
23 *need to do the right thing in selecting a treatment for their child (Moderate confidence).*<sup>21</sup>

24 Parents reported a “sense of duty” to be “strong” and “brave.” They also reported feeling  
25 pressure to “do the right thing” by their child; that is, choosing the treatment option that would  
26 give their child the best chance of “reaching their full potential.”<sup>21</sup>

## 27 **TDF Domain 3: Emotion**

28 **Summary statement:** *Five studies provided evidence to suggest that caregivers experience the*  
29 *journey of navigating their child’s epilepsy and ultimately selecting surgical treatment as an*  
30 *emotionally fraught one with emotions ranging from exhaustion, desperation, fear to relief, and*  
31 *hope (Moderate confidence).*<sup>19-23</sup>

32 Parents expressed feeling drained and stressed from always being “on call,”<sup>19</sup> worrying  
33 about a seizure,<sup>19, 22</sup> or mood and behavioral difficulties.<sup>22</sup> Parents recalled feeling frustrated<sup>19, 20</sup>  
34 and desperate to “find a treatment option that would work.”<sup>20</sup> For example, one mother was  
35 frustrated that her child’s provider continued to perform medication trials to manage seizures and  
36 not discuss surgery as an option,<sup>19</sup> while another mother was desperate to get her son to another  
37 doctor but needed to wait for referrals because of insurance.

38 When considering surgery as a potential treatment option, parents reported the decision  
39 process as “difficult,” “frightening,” and “stressful.”<sup>20, 21</sup> Parents feared surgery would lead to  
40 worse health outcomes for their child,<sup>21, 24</sup> change their child’s personality, or cause a loss of  
41 function (e.g., partial or complete loss in speech or movement).<sup>24</sup> Parents also feared the  
42 possibility of surgery making seizures worse (e.g., increased frequency, duration). Thus, making  
43 the decision to have surgery “in vain.”<sup>24</sup>

44 However, for many parents, the decision to pursue surgery brought relief and feelings of  
45 hope. Parents in one study expressed gratitude once they finally decided to pursue surgery as  
46 they felt it was “demanding to not know if surgery would be possible.”<sup>23</sup> Parents also reported  
47 feeling hope for improvements in their child’s health and wellbeing after they decided to choose  
48 surgery. Finally, after making the decision to pursue surgery (or learning it was a viable option),  
49  
50  
51

1  
2  
3 parents reported that they hoped for candidacy,<sup>19, 21</sup> and experienced relief when a date was set.  
4  
5

#### 6 **TDF Domain 4: Social influence**

7 **Summary statement:** *Three studies provided evidence to suggest that surgery is a family*  
8 *decision that requires outside support from other caregivers “experiencing the same thing” and*  
9 *from a healthcare professional acting as “champions.” (Moderate confidence) <sup>20-22</sup>*

10 Parents reported the value of connecting with other parents who were on a similar  
11 treatment journey (e.g., had a child with epilepsy that was unresponsive to medication) and had  
12 experiences and expertise that they could draw on.<sup>20, 21</sup> Peer connections helped parents  
13 understand the surgical procedural from a “parental perspective” and provided “emotional  
14 support.”<sup>21</sup> Parents also reported the value of having a good team of epilepsy providers and a  
15 “champion” (e.g., doctor, nurse, or social worker) to advocate for them and help them navigate  
16 purposefully through their journey.<sup>20</sup> One mother described one such champion, a nurse  
17 coordinator, as a “life saver,” who helped in getting referrals and pushed her to seek better care  
18 for her child.<sup>20</sup> Another mother described her child’s pediatrician as her champion because “he  
19 encouraged me and gave me...confidence.”<sup>20</sup>  
20  
21

22 Parents described seeing treatment decision-making as a family choice and indicated the  
23 importance of involving partners, siblings, grandparents, and the child (where developmentally  
24 appropriate). Parents found engaging the whole family in the decision-making process to be  
25 generally helpful, as the experience of the child’s epilepsy and potential consequences of  
26 treatment impacted the whole family.<sup>21</sup> However, for some families, decision-making regarding  
27 surgery gave rise to conflicts. For example, one mother described herself as more agreeable to  
28 surgery than the child's father because, as the primary parent, she “witnessed” the true extent of  
29 their child's seizures.<sup>21</sup>  
30

#### 31 **TDF Domain 5: Beliefs about consequences**

32 **Summary statement:** *Five studies provided evidence to suggest that parents undergo a*  
33 *transformation from seeing surgery as a last resort to the only option for their child to have a*  
34 *chance at a better life. Surgery became a viable option as parents realized that their child’s*  
35 *current treatment was not working or it had unacceptable side effects, and some saw the side*  
36 *effects of surgery as less daunting than the disease. <sup>19-24</sup>*  
37

38 Parents of children who went on to have surgery reported going through a transformation in  
39 thinking of surgery as a “last resort” to a “necessary and hopeful option.”<sup>19</sup> This transformation  
40 in thinking evolved as parents acquired greater understanding about their child’s illness and  
41 prognosis, experience in treating their child with other treatments, acquired knowledge about the  
42 potential risks and benefits of surgery, and processed the diverse emotions associated with  
43 surgery.<sup>19, 20</sup>  
44

45 An important part of parents’ moving toward a decision about surgery was weighing  
46 what they perceived to be the benefits and harms of surgery.<sup>21, 24</sup> In terms of benefits, parents  
47 hoped surgery would lead to improved outcomes such as seizure reduction and the opportunity  
48 for a “normal life” without the side effects of medications.<sup>21, 24</sup> Some parents were skeptical  
49 about the efficacy of surgery due to their experiences with medications and the ketogenic diet.  
50 According to parents, these treatments were associated with side effects, negatively affected their  
51 child’s quality of life, and provided only minimal improvement in seizure control.<sup>21</sup> In terms of  
52 adverse effects, parents were concerned that surgery would lead to surgical complications or  
53 various post-surgical impairments, including a change in personality, loss of speech or motor  
54  
55  
56  
57



1  
2  
3 function, and behavioral problems.<sup>24</sup> A small number of parents reported having no concerns  
4 before surgery.<sup>24</sup>

5 Beyond rational consideration of the benefits and risks of surgery, parents often reported  
6 coming to the decision to select surgery only after exhausting all other treatment options.<sup>21-23</sup>  
7 Parents expressed feeling like “it was the only choice [they] could make”<sup>21</sup> and their “only  
8 option”<sup>21</sup> in improving their child’s outcomes or preventing their condition from getting worse.  
9 Parents understood there were potential complications associated with surgery, but “preferred to  
10 take a risk [in proceeding with surgery] rather than live in constant fear”<sup>23</sup> or having a child that  
11 “was unconscious all the time.”<sup>22</sup>  
12  
13

#### 14 **TDF Domain 6: Environmental context and resources**

15 **Summary statement:** *Three studies provided evidence that parents face challenges in*  
16 *navigating the healthcare system and interacting with professionals to find the “right doctor” or*  
17 *care team for their child. Parents value having their concerns heard and being engaged in the*  
18 *decision-making process (Low confidence)<sup>19-21, 23</sup>*  
19

20 Parents from one study in the U.S.<sup>19, 20</sup> and another in Sweden.<sup>23</sup> reported experiencing  
21 significant barriers with navigating the healthcare system. In the U.S.,<sup>19, 20</sup> parents expressed  
22 frustration with the extensive time it took to find the right doctor after navigating various doctors  
23 from different specialties across multiple institutions. Prior to selecting surgery for their child,  
24 parents reported difficulties in finding the “right doctor” with knowledge to “effectively identify  
25 the problem, and then make a clear plan of action.” Parents attributed these difficulties to the  
26 lack of pediatric neurologists in their local area, inconsistencies in treatment recommendations,  
27 and rigid adherence to center-specific treatment protocols.<sup>19, 20</sup> Once parents made a decision to  
28 pursue surgery, they reported battles with insurance companies to pay for surgery.<sup>19, 20</sup> Parents in  
29 the Sweden study reported similar frustrations with “the bureaucracy” as they felt it took “a long  
30 time to get a correct diagnosis” and “adequate support.” They “thought that it would be helpful if  
31 the authorities understood that parents only asked for help when they had reached their limit, and  
32 then, urgent help was necessary.”<sup>23</sup>  
33  
34

35 Parents listed several provider-specific interactions they found to be either enablers or  
36 barriers to their experience of identifying and selecting appropriate treatment for their child.  
37 With respect to enablers, parents valued when providers validated (and shared) their concerns,  
38 gave their time and fostered trust, and engaged parents in the treatment decision-making process.  
39 Barriers noted by parents included having their concerns doubted or ignored,<sup>19, 23</sup> receiving  
40 inadequate information or support (especially before the epilepsy was recognized to be drug-  
41 resistant),<sup>23</sup> and feeling excluded from discussions about their child’s surgical candidacy.<sup>21</sup> One  
42 study reported that parents perceived physician variability in knowledge about epilepsy and their  
43 lack of understanding about the pre-surgical referral process and appropriateness of surgery as  
44 barriers.<sup>19</sup> Parents in one study reported how they felt more reassured when their child received  
45 care from a comprehensive team of professionals with diverse expertise.<sup>20</sup> Parents from one  
46 study suggested providers give an “earlier and softer introduction of surgery as a possible  
47 treatment option.”<sup>21</sup>  
48  
49

50 See Box 1 for example excerpts for TDF domains.

## 51 **Discussion**

52 Understanding caregiver perspectives about treatments for childhood epilepsy is important to  
53 ensure that parents are appropriately supported during their decision-making process. Our  
54 qualitative evidence synthesis of five studies, which had minimal risks to rigor, identified key  
55  
56  
57

1  
2  
3 findings across six domains: Knowledge, Emotions, Social/Professional Role and Identify,  
4 Social Influences, Beliefs about Consequences, Environmental Context and Resources.  
5 However, the evidence was limited surgical treatment. Overall, these findings suggest that the  
6 decision to select surgery for childhood epilepsy involves parents going through a complex  
7 journey of acquiring extensive knowledge, working through intense emotions and perceived  
8 parental responsibilities, needing family and peer support, transforming beliefs about epilepsy  
9 and potential treatment options, and navigating various barriers and facilitators of the healthcare  
10 system.

11  
12 These findings are supported by a similar review conducted by Samanta et al. (2021) that  
13 sought to understand caregiver decision-making around epilepsy surgery for children with drug-  
14 resistant epilepsy.<sup>25</sup> In their synthesis of a similar body of evidence, these reviewers identified  
15 the following as key determinants: knowledge and information, communication and care  
16 coordination, caregivers' emotional state, and socioeconomic factors. While the findings of our  
17 review are similar to Samanta, our scope and methodology differ. We sought to explore  
18 caregiver decision-making around all treatments for epilepsy, not just surgery. We also used  
19 rigorous methodological tools (e.g., TDF and GRADE-CerQual). Use of these tools strengthens  
20 our findings by placing them within a framework that identifies facilitators and barriers, and by  
21 providing criteria to establish confidence in the certainty of these findings.  
22

23  
24 Through the TDF framework, we identified decision domains that presented potential  
25 barriers to care that are amenable to action. For example, parents often felt that they did not have  
26 enough information to make decisions about surgery. They reported experiencing intense  
27 psychological distress and exhaustion during their decision-making process and felt these  
28 emotions acutely through their role as parents responsible for making a potentially life-altering  
29 decision for their child. Parents also reported valuing connections with peers who were going  
30 through (or had gone through) the same experience. Healthcare systems and providers may  
31 therefore consider providing parents with resources, such as patient navigators to help guide  
32 them through the healthcare system and better understand the care pathway. They can also help  
33 parents to access peer support and advocates<sup>26, 27</sup>

34  
35 The findings also identified gaps in the evidence base regarding parents' perceptions and  
36 decision-making processes. Foremost, we did not identify any studies exploring parent decision-  
37 making around non-surgical treatment options. Qualitative studies that prospectively explore  
38 caregiver decision-making about these treatments are needed to determine if perspectives differ  
39 from those about surgery. We also did not identify evidence mapping to certain TDF domains  
40 that we expected to find evidence for, such as Goals. Studies included in this review were vague  
41 and inconsistent in reporting parent's goals or their desired outcomes of treatment. Some studies  
42 noted that parents wanted what 'was best' for their child or they would be happy with a reduction  
43 in seizure frequency. Survey data collected from parents considering surgery found the primary  
44 goal was seizure freedom (98%), followed by reduced medication (90%), and improved  
45 cognition (82%).<sup>28</sup> We also did not identify evidence for the domain of Memory, Attention, and  
46 Decision process. Thus, we could not determine if parents become more skilled and confident in  
47 their decision-making over time through experience and acquired knowledge.  
48

49  
50 Similarly, we found limited evidence for the domain of Environmental Context and  
51 Resources. Further evidence is needed to understand how culture and equity play a role in  
52 parents' perceptions about treatment and their capacity to access care for their child. For  
53 example, parents reported important barriers in knowledge, access to professionals to diagnose  
54 and treat their child, and challenges with accessing and paying for surgery. The extent to which  
55  
56  
57

1  
2  
3 these factors would be the similar among families from different cultural or socio-economic  
4 backgrounds or from countries with varying economic, educational, and social resources needs  
5 further exploration.  
6

### 7 **Strengths and limitations**

8 This review followed contemporary standards for the conduct of qualitative synthesis, which  
9 includes the use of a best-fit framework approach, a theory-informed framework to guide our  
10 synthesis and extraction, and use of the CASP and GRADE-CerQual tool to assess the rigor and  
11 confidence of our findings. The use of the TDF is a particular strength of this review as it lends  
12 itself to both actionable interventions (e.g., mapping intervention strategies to key domains  
13 identified) and future research (e.g., further examination of domains not identified in the  
14 evidence such as ‘memory, attention, and decision processes’). However, as with all qualitative  
15 research, selecting which data to extract and how to code it is ultimately a subjective process. We  
16 attempted to limit subjectivity within our group by coding in duplicate and having regular  
17 meetings to ensure consistency across and within domains.  
18

19 One primary limitation is that the data in all studies included in this were collected  
20 retrospectively. Parents were asked for their perceptions *after* their child had undergone surgery.  
21 This may have resulted in selection bias, as studies recruited parents of children referred to and  
22 proceeded with surgery. Thus, findings may not be fully reflective of the wider population of  
23 parents who are making decisions regarding surgery. The perceptions of parents who declined  
24 surgery were not captured. The retrospective nature of the data collection may have also resulted  
25 in recall bias. The time from children’s surgery to data collection ranged from 6 months to 10  
26 years. Parents may have forgotten important aspects of their journey to surgery or filled in gaps  
27 of memory due to experiences with the child’s outcome. As described by one study, parent  
28 responses were “memories processed through emotions and colored from further experiences,  
29 which were then developed into opinions and personal views.”<sup>23</sup>  
30  
31  
32

### 33 **Conclusion**

34 Parents of children with epilepsy navigate a complex process to decide whether to have their  
35 child undergo surgery. Educational resources, peer support, and patient navigators may help  
36 support parents through this process. More qualitative studies are needed to fully understand the  
37 diversity of experiences of parents across various points in the decision-making pathway and  
38 among different healthcare contexts. Qualitative studies are needed that address parents’  
39 perceptions and experiences with selecting non-surgical epilepsy treatment options such as diet  
40 and medications.  
41  
42  
43  
44  
45  
46  
47  
48  
49  
50  
51  
52  
53  
54  
55  
56  
57  
58  
59  
60

1  
2  
3 **Contributors:** SU served as project lead and participated as a team member in identifying studies for  
4 inclusion, extracting and coding data, synthesizing findings, developing and grading summary statements,  
5 and drafting of initial report and manuscript; KK participated as team member in all aspects of data  
6 extraction, coding, synthesis, developing and grading summary statements, validating all findings, and  
7 revising initial drafts of manuscript; RW participated in all aspects of data extraction, coding, synthesis,  
8 developing summary statements, and reviewing manuscript; GA coordinated and revised search strategies  
9 and participated in all aspects of data extraction, coding, synthesis, and review of manuscript; KR  
10 participated in all aspects of data extraction, coding, synthesis, developing summary statements, and  
11 reviewing manuscript; MV participated in all aspects of data extraction, coding, synthesis, developing  
12 summary statements, and reviewing manuscript.  
13  
14

15 **Acknowledgements:** We would like to give a special thank you to Jane Noyes, MSc, DPhil for her  
16 mentorship, review, and support in the completion of this manuscript. We would also like to acknowledge  
17 Laura Koepfler, MLS of ECRI for her contribution in designing and running the literature searches.  
18

19 **Funding:** This work was funded by the Agency for Healthcare Research and Quality through the  
20 following contracts: RTI-University of North Carolina EPC (290-2015-00011-I), Brown University EPC  
21 (290-2015-00002-I), ECRI Institute-Penn Medicine EPC (290-2015-00005-I), Johns Hopkins University  
22 EPC (290-2015-00006-I). No award or grant number.  
23  
24

25 **Disclaimer:** The findings and conclusions in this document are those of the authors, who are responsible  
26 for its contents; the findings and conclusions do not necessarily represent the views of AHRQ. Therefore,  
27 no statement in this report should be construed as an official position of AHRQ or of the U.S. Department  
28 of Health and Human Services.  
29

30 **Competing interests:** None of the authors listed in this manuscript have competing interests.  
31

32 **Patient consent:** Not required.  
33

34 **Ethics approval:** This study does not involve human or animal participants, so no ethics approval was  
35 required.  
36

37 **Data availability statement:** No additional data available.  
38  
39  
40  
41  
42  
43  
44  
45  
46  
47  
48  
49  
50  
51  
52  
53  
54  
55  
56  
57

## References

1. Russ SA, Larson K, Halfon N. A national profile of childhood epilepsy and seizure disorder. *Pediatrics*. 2012 Feb;129(2):256-64. doi: 10.1542/peds.2010-1371. PMID: 22271699.
2. Sarmast ST, Abdullahi AM, Jahan N. Current Classification of Seizures and Epilepsies: Scope, Limitations and Recommendations for Future Action. *Cureus*. 2020 Sep 20;12(9):e10549. doi: 10.7759/cureus.10549. PMID: 33101797.
3. Symonds JD, Elliott KS, Shetty J, et al. Early childhood epilepsies: epidemiology, classification, aetiology, and socio-economic determinants. *Brain*. 2021;144(9):2879-91. doi: 10.1093/brain/awab162.
4. Scheffer IE, Berkovic S, Capovilla G, et al. ILAE classification of the epilepsies: Position paper of the ILAE Commission for Classification and Terminology. *Epilepsia*. 2017 Apr;58(4):512-21. doi: 10.1111/epi.13709. PMID: 28276062.
5. Rodenburg R, Meijer AM, Deković M, et al. Family factors and psychopathology in children with epilepsy: a literature review. *Epilepsy Behav*. 2005 Jun;6(4):488-503. doi: 10.1016/j.yebeh.2005.03.006. PMID: 15907744.
6. Rosati A, De Masi S, Guerrini R. Antiepileptic Drug Treatment in Children with Epilepsy. *CNS Drugs*. 2015;29(10):847-63. doi: 10.1007/s40263-015-0281-8. PMID: 26400189.
7. Mutanana N, Tsvere M, Chiweshe MK. General side effects and challenges associated with anti-epilepsy medication: A review of related literature. *Afr J Prim Health Care Fam Med*. 2020 Jun 30;12(1):e1-e5. doi: 10.4102/phcfm.v12i1.2162. PMID: 32634006.
8. Wirrell EC. Predicting pharmacoresistance in pediatric epilepsy. *Epilepsia*. 2013 May;54 Suppl 2:19-22. doi: 10.1111/epi.12179. PMID: 23646966.
9. Martin-McGill KJ, Jackson CF, Bresnahan R, et al. Ketogenic diets for drug-resistant epilepsy. *Cochrane Database Syst Rev*. 2018 Nov 7;11(11):Cd001903. doi: 10.1002/14651858.CD001903.pub4. PMID: 30403286.
10. Noyes J BA, Cargo M, Flemming K, Harden A, Harris J, Garside R, Hannes K, Pantoja T, Thomas J. Chapter 21: Qualitative evidence. In: Higgins JPT TJ, Chandler J, Cumpston M, Li T, Page MJ, Welch VA, ed *Cochrane Handbook for Systematic Reviews of Interventions version 63*. Cochrane; 2019 (updated February 2022).
11. Porritt K, Gomersall J, Lockwood C. JBI's systematic reviews: study selection and critical appraisal. *AJN The American Journal of Nursing*. 2014;114(6):47-52.
12. Wong G, Greenhalgh T, Westhorp G, et al. RAMESES publication standards: meta-narrative reviews. *BMC Medicine*. 2013 2013/01/29;11(1):20. doi: 10.1186/1741-7015-11-20.
13. Programme CAS. *CASP Qualitative Studies Checklist*. 2022.
14. Michie S, Johnston M, Abraham C, et al. Making psychological theory useful for implementing evidence based practice: a consensus approach. *Qual Saf Health Care*. 2005 Feb;14(1):26-33. doi: 10.1136/qshc.2004.011155. PMID: 15692000.
15. Cane J, O'Connor D, Michie S. Validation of the theoretical domains framework for use in behaviour change and implementation research. *Implement Sci*. 2012 Apr 24;7:37. doi: 10.1186/1748-5908-7-37. PMID: 22530986.
16. Glenton C, Carlsen B, Lewin S, et al. Applying GRADE-CERQual to qualitative evidence synthesis findings-paper 5: how to assess adequacy of data. *Implement Sci*. 2018 Jan 25;13(Suppl 1):14. doi: 10.1186/s13012-017-0692-7. PMID: 29384077.

- 1  
2  
3 17. Colvin CJ, Garside R, Wainwright M, et al. Applying GRADE-CERQual to qualitative evidence synthesis  
4 findings-paper 4: how to assess coherence. *Implement Sci.* 2018 Jan 25;13(Suppl 1):13. doi: 10.1186/s13012-017-  
5 0691-8. PMID: 29384081.  
6
- 7 18. Lewin S, Bohren M, Rashidian A, et al. Applying GRADE-CERQual to qualitative evidence synthesis  
8 findings-paper 2: how to make an overall CERQual assessment of confidence and create a Summary of Qualitative  
9 Findings table. *Implement Sci.* 2018 Jan 25;13(Suppl 1):10. doi: 10.1186/s13012-017-0689-2. PMID: 29384082.  
10
- 11 19. Baca CB, Pieters HC, Iwaki TJ, et al. "A journey around the world": Parent narratives of the journey to  
12 pediatric resective epilepsy surgery and beyond. *Epilepsia.* 2015 Jun;56(6):822-32. doi: 10.1111/epi.12988. PMID:  
13 25894906.  
14
- 15 20. Pieters HC, Iwaki T, Vickrey BG, et al. "It was five years of hell": Parental experiences of navigating and  
16 processing the slow and arduous time to pediatric resective epilepsy surgery. *Epilepsy Behav.* 2016 Sep;62:276-84.  
17 doi: 10.1016/j.yebeh.2016.07.019. PMID: 27521720.  
18
- 19 21. Heath G, Abdin S, Begum R, et al. Putting children forward for epilepsy surgery: A qualitative study of UK  
20 parents' and health professionals' decision-making experiences. *Epilepsy Behav.* 2016 Aug;61:185-91. doi:  
21 10.1016/j.yebeh.2016.05.037. PMID: 27371883.  
22
- 23 22. O'Brien J, Gray V, Woolfall K. Child and parent experiences of childhood epilepsy surgery and adjustment to  
24 life following surgery: A qualitative study. *Seizure.* 2020 Dec;83:83-8. doi: 10.1016/j.seizure.2020.10.006. PMID:  
25 33120326.  
26
- 27 23. Ozanne A, Verdinelli C, Olsson I, et al. Parental experiences before and long-term after their children's  
28 hemispherotomy - A population-based qualitative study. *Epilepsy Behav.* 2016 Jul;60:11-6. doi:  
29 10.1016/j.yebeh.2016.04.025. PMID: 27176878.  
30
- 31 24. Sylvén I, Olsson I, Hallböök T, et al. 'In the best case seizure-free' - Parental hopes and worries before and  
32 satisfaction after their child's epilepsy surgery. *Epilepsy Behav.* 2020 Sep;110:107153. doi:  
33 10.1016/j.yebeh.2020.107153. PMID: 32480305.  
34
- 35 25. Samanta D, Hoyt ML, Perry MS. Parental experience and decision-making for epilepsy surgery: A systematic  
36 review of qualitative and quantitative studies. *Epilepsy Behav.* 2021 Oct;123:108263. doi:  
37 10.1016/j.yebeh.2021.108263. PMID: 34428615.  
38
- 39 26. Michie S, van Stralen MM, West R. The behaviour change wheel: a new method for characterising and  
40 designing behaviour change interventions. *Implement Sci.* 2011 Apr 23;6:42. doi: 10.1186/1748-5908-6-42. PMID:  
41 21513547.  
42
- 43 27. Gainforth HL, Sheals, K., Atkins, L., Jackson, R., & Michie, S. . Developing interventions to change recycling  
44 behaviors: A case study of applying behavioral science. . *Applied Environmental Education & Communication.*  
45 2016;15(4):325-39.  
46
- 47 28. Bach Q, Thomale UW, Müller S. Parents' and children's decision-making and experiences in pediatric epilepsy  
48 surgery. *Epilepsy Behav.* 2020 Jun;107:107078. doi: 10.1016/j.yebeh.2020.107078. PMID: 32320930.  
49  
50  
51  
52  
53  
54  
55  
56  
57

## Box 1. Example excerpts for TDF domains

### Knowledge

- [Parent]: “I googled it until I couldn’t google anymore, and I think that gave me a better understanding of what was going on.”<sup>21</sup>.
- A mother who stated, “I just think knowledge is power and it also brings some comfort to making a good decision,” exemplified the sense of empowerment associated with gaining fluency in the language of epilepsy<sup>19</sup>

### Social/Professional Role and Identity

- Parents discussed feeling pressure from a need to “do the right thing” by their child; that is, choosing the treatment option that would give their child the best chance of reaching their full potential.<sup>21</sup>

### Emotion

- Participant descriptions highlighted the significant impact that epilepsy had upon on the child’s and family’s lives prior to epilepsy surgery. Worries about seizures and the associated risks led to constant fatigue for some: “you’re tired yourself before you even go out the door”<sup>22</sup>
- [Parent]: “At first I was horrified at the thought of this innocent – having her brain opened and operated on. It just seemed so barbaric”<sup>20</sup>

### Social Influences

- Most participants described finding it difficult to talk to others about epilepsy, with several reporting that they limited the information they shared, or withholding the diagnosis altogether. “Gosh, we didn’t tell anybody. We were ashamed.”<sup>22</sup>
- [E]xchanging shared experiences with peers gave direction to decision-making because it helped with processing complex factual and emotional information”<sup>20</sup>.

### Beliefs about Consequences

- This transformation occurred as parents became increasingly aware of the severity of their child’s epilepsy and its impact on their child’s and their future life. Although surgery remained scary, epilepsy was or became scarier than surgery. As some parents feared that their child would die from epilepsy, surgery was no longer perceived as an elective treatment<sup>19</sup>
- They wanted that their child could do everything their friends could do like “play football, cycle, and swim independently”. Some parents mentioned that they wanted their child to be able to go back to school and have a “proper social life” while some parents referenced the future hoping that the child would be better placed to get a job and driving license as a result of surgery<sup>24</sup>
- Parents felt that epilepsy surgery was a question of life or death, of chaos or control. It was terrifying to see the child so ill. The epilepsy was uncontrolled, and drugs gave side effects. Parents felt that there was no alternative to surgery. However, it was a difficult decision since they did not know the outcome.<sup>23</sup>

### Environmental Context and Resources

- Trust and safety characterized the relations to the pediatric neurologists and specialist nurses. It strengthened parents’ trust to see that the pediatric neurologist fought for the child and that the parents’ opinions counted in the decision process. Parents appreciated continuous contact.<sup>23</sup>
- Looking back, one father voiced happiness that he listened to his parental instincts rather than the opinion of one doctor. He (doctor) said, “‘I don’t believe that she is a surgical candidate.’ As a parent, I listened and I wanted to think otherwise.... In hindsight, I’m glad I didn’t listen to him.”<sup>19</sup>

**Table 1. Characteristics of included studies**

| Study, year, country                         | Population                                                                                                                                      | Number of parents                                                            | Time from surgery to data Collection | Study aim                                                                                                                                                                                                                                                                                                                                                                                                                                                                                | Data collection methods                                                           | Data analysis methods |
|----------------------------------------------|-------------------------------------------------------------------------------------------------------------------------------------------------|------------------------------------------------------------------------------|--------------------------------------|------------------------------------------------------------------------------------------------------------------------------------------------------------------------------------------------------------------------------------------------------------------------------------------------------------------------------------------------------------------------------------------------------------------------------------------------------------------------------------------|-----------------------------------------------------------------------------------|-----------------------|
| Baca <sup>1</sup> , 2015; Pieters, 2016, USA | Parents of children who had previously undergone resective epilepsy surgery                                                                     | 37 (individual parents)<br>31 mothers; 6 other                               | NR                                   | Baca, 2015: To identify the nature and range of parent-perceived barriers to timely receipt of pediatric epilepsy surgery.<br>Pieters, 2016: A) To describe thoroughly the parental experiences and perceptions of this slow and arduous period prior to the presurgical referral and evaluation to a comprehensive pediatric epilepsy center. B) To delineate the range of parent identified factors, or facilitators, that helped move families forward along their journey to surgery | Semi-structured interviews lasting on average 29 minutes (range 10 to 60 mins)    | Thematic analysis     |
| Heath, 2016, UK                              | Parents of children who had undergone pediatric epilepsy surgery<br>Also interviewed healthcare professionals caring for children with epilepsy | 9 (individual parents)<br>8 mothers; 1 father<br>10 healthcare professionals | NR                                   | To explore how parents and health professionals make decisions regarding pediatric epilepsy surgery to identify:<br>A) factors that influence the process of decision-making regarding pediatric epilepsy surgery from the perspective of parents and professionals and B) the support needs of those considering surgery as a treatment option for a child with medically intractable epilepsy                                                                                          | Semi-structured interviews lasting about 1 hour, and non-participant observations | Thematic analysis     |
| O'Brien, 2020, UK                            | Parents and their children who had gone through resective epilepsy surgery                                                                      | 9 parents (1 couple; 7 individual parents)<br>8 mothers; 1 father            | 6 months to 3 years                  | To explore children's and parents' perspectives on the journey prior to and following surgical treatment, with a focus on the emotional experiences of children and their parents throughout the surgery journey                                                                                                                                                                                                                                                                         | Semi-structured interviews lasting 25 to 75 mins                                  | Thematic analysis     |
| Ozanne, 2016, Sweden                         | Parents of children who had previously undergone resective epilepsy surgery                                                                     | 24 parents<br>13 mothers; 11 fathers                                         | 5 to 10 years                        | To explore parental experiences before and after hemispherotomy as reported at a long-term follow-up and the parents' views on received information and support                                                                                                                                                                                                                                                                                                                          | Interviews (length of time not reported)                                          | Content analysis      |
| Sylvén, 2020, Sweden                         | Parents of children who were undergoing resective epilepsy surgery (and 2 years post-surgery)                                                   | 107 (parental responses to both surveys)                                     | 2 years                              | A) To understand parental hopes and worries before their child underwent epilepsy surgery and B) To understand parental satisfaction two years after their child had undergone epilepsy surgery                                                                                                                                                                                                                                                                                          | Surveys (open-ended questions)                                                    | Thematic analysis     |

<sup>1</sup> Baca & Pieters included the same patient population but reported on different aspects of parent perspectives.



**Table 2. GRADE-CERQual summary of findings statements and ratings**

| Summary of Review Findings                                                                                                                                                                                                                                                                                                                                                   | Studies contributing                                 | Methodological limitations (CASP ratings)                                                                                                 | Coherence                                                                                | Adequacy <sup>2</sup>                                                                                                                                                                                                                                                                | Relevance                        | CERQual assessment         | Explanation of CERQual assessment                                                                            |
|------------------------------------------------------------------------------------------------------------------------------------------------------------------------------------------------------------------------------------------------------------------------------------------------------------------------------------------------------------------------------|------------------------------------------------------|-------------------------------------------------------------------------------------------------------------------------------------------|------------------------------------------------------------------------------------------|--------------------------------------------------------------------------------------------------------------------------------------------------------------------------------------------------------------------------------------------------------------------------------------|----------------------------------|----------------------------|--------------------------------------------------------------------------------------------------------------|
| <u>Knowledge</u> : Caregivers value information about epilepsy, its treatment options, and navigating the healthcare system to access timely and effective treatment for their child. Despite feeling overwhelmed by the complexity and sometimes contradictory information, caregivers value learning this new language so they can become better advocates for their child | Baca/Pieters<br>Heath<br>O'Brien<br>Ozanne           | <i>Minor concerns</i> : Nature of relationship between researchers and participants not reported; retrospective recruitment. <sup>1</sup> | <i>No or very minor concerns</i> : Findings reflect the complexity and variation of data | <i>Minor concerns</i> : Included studies limited to surgery as treatment decision. We did not identify studies meeting inclusion criteria that addressed other treatments, such as diet or medications. Each study addressed knowledge acquisition and reported on it in some depth. | <i>No or very minor concerns</i> | <i>Moderate confidence</i> | Four studies with similar findings; minor concerns related to methods and limited treatment scope (surgery). |
| <u>Social/professional role and identity</u> , parents feel a sense of duty and need to do the right thing in selecting a treatment for their child.                                                                                                                                                                                                                         | Heath                                                | <i>Minor concerns</i> : Nature of relationship between researchers and participants not reported; retrospective recruitment. <sup>1</sup> | <i>No or very minor concerns</i> : Findings reflect the complexity and variation of data | <i>Minor concern</i> : Included studies limited to surgery as treatment decision.                                                                                                                                                                                                    | <i>No or very minor concerns</i> | <i>Moderate confidence</i> | One study; minor concerns related to methods and limited treatment scope (surgery).                          |
| <u>Emotion</u> , parents experience the journey of navigating their child's epilepsy and ultimately selecting surgical treatment as an emotionally fraught one with emotions ranging from exhaustion, desperation and fear to relief and hope.                                                                                                                               | Baca/Pieters<br>Heath<br>O'Brien<br>Ozanne<br>Sylvén | <i>Minor concerns</i> : Nature of relationship between researchers and participants not reported; retrospective recruitment. <sup>1</sup> | <i>No or very minor concerns</i> : Findings reflect the complexity and variation of data | <i>No or very minor concerns</i> : All 4 studies contributed to the rich depth of the varied emotions from fear of the illness to fear of the surgery to the mental toll that took on families and hope                                                                              | <i>No or very minor concerns</i> | <i>Moderate confidence</i> | Five studies with similar findings; minor concerns related to methods and limited treatment scope (surgery). |

| Summary of Review Findings                                                                                                                                                                                                                                                                                                                                                                                  | Studies contributing                                 | Methodological limitations (CASP ratings)                                                                                                   | Coherence                                                                                  | Adequacy <sup>2</sup>                                                                                                                                                                               | Relevance                        | CERQual assessment         | Explanation of CERQual assessment                                                                                                                               |
|-------------------------------------------------------------------------------------------------------------------------------------------------------------------------------------------------------------------------------------------------------------------------------------------------------------------------------------------------------------------------------------------------------------|------------------------------------------------------|---------------------------------------------------------------------------------------------------------------------------------------------|--------------------------------------------------------------------------------------------|-----------------------------------------------------------------------------------------------------------------------------------------------------------------------------------------------------|----------------------------------|----------------------------|-----------------------------------------------------------------------------------------------------------------------------------------------------------------|
|                                                                                                                                                                                                                                                                                                                                                                                                             |                                                      |                                                                                                                                             |                                                                                            | and relief that surgery may offer                                                                                                                                                                   |                                  |                            |                                                                                                                                                                 |
| <u>Social influences</u> , surgery is a family decision that requires outside support from other parents “experiencing the same thing” and from a healthcare professional acting as “champions.”                                                                                                                                                                                                            | Pieters<br>Heath<br>O'Brien                          | <i>Minor concerns:</i><br>Nature of relationship between researchers and participants not reported; retrospective recruitment. <sup>1</sup> | <i>No or very minor concerns:</i><br>Findings reflect the complexity and variation of data | <i>No or very minor concerns</i>                                                                                                                                                                    | <i>No or very minor concerns</i> | <i>Moderate confidence</i> | Three studies with similar findings; minor concerns related to methods and limited treatment scope (surgery).                                                   |
| <u>Beliefs about consequences</u> , caregivers undergo a transformation from seeing surgery as a last resort to the only option for their child to have a chance at a better life. Surgery became a viable option as parents realized that their child’s current treatment was not working or it had unacceptable side effects, and some saw the side effects of surgery as less daunting than the disease. | Baca/Pieters<br>Heath<br>O'Brien<br>Ozanne<br>Sylvén | <i>Minor concerns:</i><br>Nature of relationship between researchers and participants not reported; retrospective recruitment. <sup>1</sup> | <i>No or very minor concerns:</i><br>Findings reflect the complexity and variation of data | <i>No or very minor concerns</i>                                                                                                                                                                    | <i>No or very minor concerns</i> | <i>Moderate confidence</i> | Five studies with similar findings; minor concerns related to methods and limited treatment scope (surgery).                                                    |
| <u>Environmental context and resources</u> , parents expressed challenges in navigating the healthcare system and interacting with professionals to find the “right doctor” or care team for their child. Parents value having their concerns heard and being engaged in the decision-making process.                                                                                                       | Baca/Pieters<br>Heath<br>Ozanne                      | <i>Minor concerns:</i><br>Nature of relationship between researchers and participants not reported; retrospective recruitment. <sup>1</sup> | <i>No or very minor concerns:</i><br>Findings reflect the complexity and variation of data | <i>Moderate concerns:</i> The three studies are limited to surgery and to US, Sweden and the UK. Healthcare barriers seemed particularly salient to U.S. respondents (including insurance barriers) | <i>No or very minor concerns</i> | <i>Low confidence</i>      | Three studies with similar findings; moderate concerns related to methods, limited scope (surgery), and context-specific healthcare experiences of participants |

<sup>1</sup>Retrospective recruitment raises concerns about selection bias.

<sup>2</sup>We only downgraded for adequacy due to studies being limited to surgery when the summarized theme was based on parent’s general feelings about epilepsy and could thus potentially apply to parent decisions regarding other treatment choices.

1  
2  
3 **FIGURE TITLES**

4 **Figure 1. PRISMA flow diagram of studies identified**

5  
6 **Figure 2. The six theoretical domains identified in this review that impacted treatment decision-making and the main themes representing those**  
7 **domains**  
8  
9

10  
11  
12  
13  
14  
15  
16  
17  
18  
19  
20  
21  
22  
23  
24  
25  
26  
27  
28  
29  
30  
31  
32  
33  
34  
35  
36  
37  
38  
39  
40  
41  
42  
43  
44  
45  
46  
47

For peer review only

1  
2  
3  
4  
5  
6  
7  
8  
9  
10  
11  
12  
13  
14  
15  
16  
17  
18  
19  
20  
21  
22  
23  
24  
25  
26  
27  
28  
29  
30  
31  
32  
33  
34  
35  
36  
37  
38  
39  
40  
41  
42  
43  
44  
45  
46  
47  
48  
49  
50  
51  
52  
53  
54  
55  
56  
57  
58  
59  
60

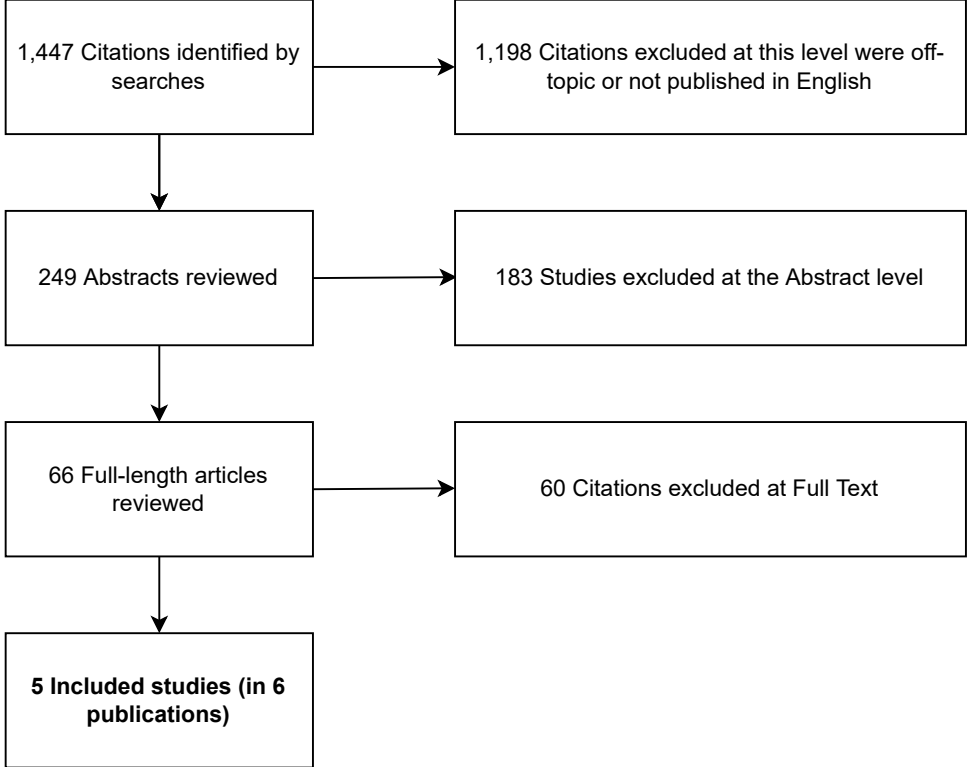

1  
2  
3  
4  
5  
6  
7  
8  
9  
10  
11  
12  
13  
14  
15  
16  
17  
18  
19  
20  
21  
22  
23  
24  
25  
26  
27  
28  
29  
30  
31  
32  
33  
34  
35  
36  
37  
38  
39  
40  
41  
42  
43  
44  
45  
46



1  
2  
3  
4  
5  
6  
7  
8  
9  
10  
11  
12  
13  
14  
15  
16  
17  
18  
19  
20  
21  
22  
23  
24  
25  
26  
27  
28  
29  
30  
31  
32  
33  
34  
35  
36  
37  
38  
39  
40  
41  
42  
43  
44  
45  
46  
47

# APPENDIX A: Search Strategy

## EMBASE (Searched January 1, 1999, to August 19, 2021)

| Set | Concept                                                            | Search statement                                                                                                                                                                                                                                                                                                                                                                                                                                                                                                                                                                                                                                                                                                                                                                                   |
|-----|--------------------------------------------------------------------|----------------------------------------------------------------------------------------------------------------------------------------------------------------------------------------------------------------------------------------------------------------------------------------------------------------------------------------------------------------------------------------------------------------------------------------------------------------------------------------------------------------------------------------------------------------------------------------------------------------------------------------------------------------------------------------------------------------------------------------------------------------------------------------------------|
| 1   | Infantile/<br>Pediatric Epilepsies                                 | 'benign childhood epilepsy'/exp OR 'childhood absence epilepsy'/exp OR 'severe myoclonic epilepsy in infancy'/exp OR (dravet* NEXT/1 (disease OR syndrome))                                                                                                                                                                                                                                                                                                                                                                                                                                                                                                                                                                                                                                        |
| 2   | 0-3 Age Group and Epilepsy                                         | [infant]/lim OR [newborn]/lim OR newborn/exp OR [preschool]/lim OR 'preschool child'/exp OR toddler/exp OR (babies OR baby OR child*:ti OR infan* OR neonat* OR newborn* OR nicu OR paediatric* OR pediatric* OR preschool* OR toddler* OR 'very young'):ab,ti,kw OR ('younger than' OR under OR below) NEAR/3 (3 OR three) OR (3 OR three) NEAR/3 ('or below' OR 'or under' OR 'or younger') AND ('epilepsy'/exp OR 'epileptic patient'/exp OR epilep*:ti)                                                                                                                                                                                                                                                                                                                                        |
| 3   | Infantile Spasms/<br>Neonatal Seizures<br>(not requiring epilepsy) | 'infantile spasm'/exp OR (((infan* OR neonat* OR newborn*) NEAR/2 (convuls* OR seizure* OR spasm*)):ab,ti,kw)                                                                                                                                                                                                                                                                                                                                                                                                                                                                                                                                                                                                                                                                                      |
| 4   | Other Seizures (not requiring Epilepsy)                            | ([infant]/lim OR [newborn]/lim OR 'newborn'/exp OR babies:ab,ti,kw OR baby:ab,ti,kw OR infan*:ab,ti,kw OR neonat*:ab,ti,kw OR newborn*:ab,ti,kw OR nicu:ab,ti,kw) AND ('febrile convulsion'/exp OR 'seizure'/exp OR convuls*:ab,ti,kw OR spasm*:ab,ti,kw OR seizure*:ab,ti,kw)                                                                                                                                                                                                                                                                                                                                                                                                                                                                                                                     |
| 5   | Pharmacologic/<br>Vitamin Treatment                                | acetazolamide OR acth OR 'adrenocorticotrophic hormone' OR benzodiazepine* OR brivaracetam OR bromide OR cannabidiol OR carbamazepine OR clobazam OR clonazepam OR clorazepate OR corticotropin OR divalproex OR eslicarbazepine OR ethosuximide OR everolimus OR felbamate OR fenfluramine OR folate OR 'folic acid' OR frisium OR gabapentin OR lacosamide OR lamotrigine OR levetiracetam OR liposteroid OR lorazepam OR mesuximide OR methsuximide OR onfi OR oxcarbazepine OR perampanel OR phenobarbital OR phenytoin OR prednisone OR pregabalin OR primidone OR pyridoxine OR 'pyridoxal 5 phosphate' OR rufinamide OR sabril OR stiripentol OR thiopental OR thiopentone OR tiagabine OR topiramate OR valproate OR 'valproate semisodium' OR 'valproic acid' OR vigabatrin OR zonisamide |
| 6   | Diet<br>Therapy                                                    | 'ketogenic diet'/de OR (keto* OR ketogenic OR 'low glycemic index' OR 'medium chain triglyceride' OR 'modified atkins' OR 'modified keto' OR 'modified ketogenic'):ab,ti,kw                                                                                                                                                                                                                                                                                                                                                                                                                                                                                                                                                                                                                        |
| 7   | Surgical Procedures                                                | craniotomy/de OR hemispherectomy/de OR 'laser surgery'/de OR lobectomy/de OR 'corpus callosotomy' OR craniotom* OR (disconnect* NEAR/3 (hemispher* OR surg* OR procedure*)) OR hemispherectom* OR hemispherotom* OR lesionectom* OR lobectom* OR (laser* NEAR/3 (ablat* OR operat* OR procedure* OR surg*)) OR (multilobar NEAR/3 disconnect*) OR (palliat* NEAR/3 operat* OR procedure* OR surg*) OR resect* OR resection OR transect* OR transection* OR 'sublobar resection' OR 'subpial transection'                                                                                                                                                                                                                                                                                           |
| 8   | Brain Stimulation                                                  | 'brain depth stimulation'/de OR 'brain responsive neurostimulator'/de OR 'deep brain stimulator'/de OR 'nerve stimulation'/de OR 'nerve stimulator'/de OR 'vagus nerve stimulation'/de OR ('brain stimulat*' OR 'deep brain stimulat*' OR 'electric brain stimulat*' OR 'external trigeminal nerve stimulat*' OR 'responsive brain stimulat*' OR 'responsive neurostimulat*' OR 'vagus nerve stimulat*' OR stimulation OR stimulator*) OR ((brain OR 'deep brain' OR electric* OR responsive OR 'vagus nerve') NEAR/2 (electrostim* OR stimulat*)) OR neurostim*                                                                                                                                                                                                                                   |

|    |                                                              |                                                                                                                                                                                                                                                                                                                                                                                                                                                                                                                                                                                                                                                                                                                                                                                                                                                                                                                                                                                 |
|----|--------------------------------------------------------------|---------------------------------------------------------------------------------------------------------------------------------------------------------------------------------------------------------------------------------------------------------------------------------------------------------------------------------------------------------------------------------------------------------------------------------------------------------------------------------------------------------------------------------------------------------------------------------------------------------------------------------------------------------------------------------------------------------------------------------------------------------------------------------------------------------------------------------------------------------------------------------------------------------------------------------------------------------------------------------|
| 9  | Harms                                                        | anhidrosis/de OR 'adverse event'/de OR 'adverse drug reaction'/de OR 'behavior disorder'/de OR 'cognitive defect'/de OR 'developmental delay'/de OR 'developmental disorder'/de OR dystonia/de OR 'liver injury'/de OR 'loss of appetite'/de OR 'motor dysfunction'/de OR 'organ damage'/de OR 'patient harm'/de OR 'sleep disorder'/de OR sweating/de OR (advers* OR harm* OR 'side effect'):ab,ti,kw OR anhidrosis OR (appetite NEAR/3 (lose OR losing OR loss)) OR ((cognitiv* OR behavior* OR develop* OR motor OR movement OR neurodevelop*) NEAR/3 (effect* OR disorder* OR problem* OR symptom*)) OR ((cognitiv* OR develop* OR neurodevelopment*) NEAR/3 (delay* OR disorder* OR regress*)) OR dystonia OR hypohidrosis OR hypohydrosis OR (liver NEAR/3 (damag* OR injur*)) OR (miss* NEAR/3 milestone*) OR ((eat* OR perspir* OR sweat* OR sleep*) NEAR/3 (disorder* OR inability OR unable))                                                                         |
| 10 | Parental Preferences                                         | parent/de OR (parent* OR mother* OR father*):ab,ti,kw                                                                                                                                                                                                                                                                                                                                                                                                                                                                                                                                                                                                                                                                                                                                                                                                                                                                                                                           |
| 11 | Untreated Disease                                            | 'treatment refusal'/de OR ('not treated' OR 'no treatment' OR untreat*):ab,ti,kw OR (declin* OR forgo* OR 'not' OR no OR refus* OR withheld OR withhold*) NEXT/3 (treated OR treatment*)                                                                                                                                                                                                                                                                                                                                                                                                                                                                                                                                                                                                                                                                                                                                                                                        |
| 12 | Study Designs/<br>Publication Types                          | [english]/lim AND [1999-2020]/py NOT ([animals]/lim NOT [humans]/lim OR abstract:nc OR annual:nc OR 'book'/de OR ((case NEXT/1 (report* OR stud*)):ti) OR 'case report'/de OR 'case study'/de OR conference:nc OR 'conference abstract':it OR 'conference paper'/de OR 'conference paper':it OR 'conference proceeding':pt OR 'conference review':it OR congress:nc OR diagnos*:ti OR 'diagnosis'/mj OR 'diagnostic accuracy'/mj OR 'diagnostic procedures'/mj OR 'diagnostic test'/mj OR 'diagnostic test accuracy study'/mj OR 'differential diagnosis'/mj OR 'editorial'/de OR editorial:it OR 'erratum'/de OR guideline*:ti OR letter:it OR 'note'/de OR note:it OR meeting:nc OR 'practice guideline'/de OR 'review'/exp OR sessions:nc OR 'short survey'/de OR symposium:nc OR animal*:ti OR experimental:ti OR (vitro:ti NOT vivo:ti) OR canine:ti OR dog:ti OR dogs:ti OR mouse:ti OR mice:ti OR rabbit*:ti OR rat:ti OR rats:ti OR rodent*:ti OR sheep:ti OR swine:ti) |
| 13 | Combine sets                                                 | #1 OR #2 OR #3 OR #4                                                                                                                                                                                                                                                                                                                                                                                                                                                                                                                                                                                                                                                                                                                                                                                                                                                                                                                                                            |
| 14 | Combine sets<br>(KQ1 Pharmacology)                           | #13 AND #12 AND #5                                                                                                                                                                                                                                                                                                                                                                                                                                                                                                                                                                                                                                                                                                                                                                                                                                                                                                                                                              |
| 15 | Combine sets<br>(KQ2 Diet, Surgery, Brain Stimulation)       | #13 AND #12 AND (#6 OR #7 OR #8)                                                                                                                                                                                                                                                                                                                                                                                                                                                                                                                                                                                                                                                                                                                                                                                                                                                                                                                                                |
| 16 | Combine sets<br>(KQ3 Treatment Harms)                        | #13 AND #12 AND (#5 OR #6 OR #7 OR #8) AND 9                                                                                                                                                                                                                                                                                                                                                                                                                                                                                                                                                                                                                                                                                                                                                                                                                                                                                                                                    |
| 17 | Combine sets<br>(CQ1 Parental Preferences)                   | #13 AND #12 AND (#5 OR #6 OR #7 OR #8) AND #10                                                                                                                                                                                                                                                                                                                                                                                                                                                                                                                                                                                                                                                                                                                                                                                                                                                                                                                                  |
| 18 | Combine sets<br>(CQ2 Untreated/<br>Uncontrolled<br>Epilepsy) | #11 AND #12 AND #13                                                                                                                                                                                                                                                                                                                                                                                                                                                                                                                                                                                                                                                                                                                                                                                                                                                                                                                                                             |

|    |                         |                   |
|----|-------------------------|-------------------|
| 19 | Combine Sets<br>All KQs | #14 OR #15 OR #16 |
| 20 | Combine Sets<br>All CQs | #17 OR #18        |

### SocINDEX and Web of Science databases (Searched January 1, 1999, to August 19, 2021)

(epilep\* OR convuls\* OR seizure\* OR spasm\*)

AND

(acetazolamide OR acth OR 'adrenocorticotrophic hormone' OR benzodiazepine\* OR brivaracetam OR bromide OR cannabidiol OR carbamazepine OR clobazam OR clonazepam OR clorazepate OR corticotropin OR divalproex OR eslicarbazepine OR ethosuximide OR everolimus OR felbamate OR fenfluramine OR folate OR 'folic acid' OR frisium OR gabapentin OR lacosamide OR lamotrigine OR levetiracetam OR liposteroid OR lorazepam OR mesuximide OR methsuximide OR onfi OR oxcarbazepine OR perampanel OR phenobarbital OR phenytoin OR prednisone OR pregabalin OR primidone OR pyridoxine OR 'pyridoxal 5 phosphate' OR rufinamide OR sabril OR stiripentol OR thiopental OR thiopentone OR tiagabine OR topiramate OR valproate OR 'valproate semisodium' OR 'valproic acid' OR vigabatrin OR zonisamide OR keto\* OR ketogenic OR 'low glycemic index' OR 'medium chain triglyceride' OR 'modified atkins' OR 'modified keto' OR 'modified ketogenic' OR 'corpus callosotomy' OR craniotom\* OR (disconnect\* AND (hemispher\* OR surg\* OR procedure\*)) OR hemispherectom\* OR hemispherotom\* OR lesionectomy\* OR lobectomy\* OR (laser\* AND (ablat\* OR operat\* OR procedure\* OR surg\*)) OR (multilobar AND disconnect\*) OR (palliat\* AND operat\* OR procedure\* OR surg\*) OR resect\* OR resection OR transect\* OR transection\* OR 'sublobar resection' OR 'subpial transection' OR 'brain stimulat\*' OR 'deep brain stimulat\*' OR 'electric brain stimulat\*' OR 'external trigeminal nerve stimulat\*' OR 'responsive brain stimulat\*' OR 'responsive neurostimulat\*' OR 'vagus nerve stimulat\*' OR stimulation OR stimulator\*) OR ((brain OR 'deep brain' OR electric\* OR responsive OR 'vagus nerve') AND (electrostim\* OR stimulat\*)) OR neurostim\*)

AND

(parent\* OR mother\* OR father\*)

AND

(perception OR factor\* OR decision)



**CINAHL (Searched January 1, 1999, to August 19, 2021)**

| Set | Concept                              | Search statement                                                                                                                                                                                                                                                                                                                           |
|-----|--------------------------------------|--------------------------------------------------------------------------------------------------------------------------------------------------------------------------------------------------------------------------------------------------------------------------------------------------------------------------------------------|
| 1   | Childhood Epilepsy                   | "benign childhood epilepsy" OR "childhood absence epilepsy" OR "severe myoclonic epilepsy in infancy" OR dravet*                                                                                                                                                                                                                           |
| 2   | Epilepsy/<br>0-3 Age Group           | (babies OR baby OR child* OR infan* OR neonat* OR newborn* OR nicu OR paediatric* OR pediatric* OR preschool* OR toddler* OR "very young" OR "younger than three" OR "younger than 3" OR "under three" OR "under 3" OR "below three" OR "below 3" OR "3 or below" OR "3 or younger" OR "three or below" OR "three or younger") AND epilep* |
| 3   | Infantile Spasm/<br>Neonatal Seizure | "infantile spasm*" OR "neonatal seizure*" OR ((babies OR baby OR infan* OR neonat* OR newborn* OR nicu) AND (convuls* OR seizure* OR spasm*))                                                                                                                                                                                              |
| 4   | Parental Preferences                 | father* OR matern* OR mother* OR parent* OR patern*                                                                                                                                                                                                                                                                                        |
| 5   | Harms                                | "adverse drug reaction" OR "adverse effect*" OR "adverse event*" OR anhidrosis OR appetite* OR behavior* OR behaviour* OR cognitiv* OR defect* OR delay* OR development* OR disorder* OR dysfunction* OR dyston* OR harm* OR impair* OR injur* OR liver OR motor OR "organ damage*" OR "sleep disorder*" OR sweat* OR "side effect"        |
| 6   | Untreated<br>Disease                 | "treatment refusal" OR "not treated" OR "no treatment" OR untreat* OR "decline treatment" OR "declined treatment" OR "forgo* treatment" OR "refuse treatment" OR "refused treatment" OR "refusing treatment" OR "withheld treatment" OR "withhold treatment" OR "withholding treatment"                                                    |
| 7   | Combine Concepts                     | (S1 OR S2 OR S3) AND S4                                                                                                                                                                                                                                                                                                                    |
| 8   | Apply Limits                         | S7 AND (Published Date: 19990101-20210831; English Language; Exclude MEDLINE records)                                                                                                                                                                                                                                                      |
| 9   | Combine concepts                     | (S1 OR S2 OR S3) AND (S5 AND S6)                                                                                                                                                                                                                                                                                                           |
| 10  | Apply Limits                         | S9 AND (Published Date: 19990101-20210831; English Language; Exclude MEDLINE records)                                                                                                                                                                                                                                                      |

**PsycINFO (Searched January 1, 1999, to August 19, 2021)**

| Set | Concept                              | Search statement                                                                                                                                                                                                                                                                                                                                                                                      |
|-----|--------------------------------------|-------------------------------------------------------------------------------------------------------------------------------------------------------------------------------------------------------------------------------------------------------------------------------------------------------------------------------------------------------------------------------------------------------|
| 1   | Childhood<br>Epilepsy                | "benign childhood epilepsy" OR "childhood absence epilepsy" OR "severe myoclonic epilepsy in infancy" OR (dravet* adj1 (disease OR syndrome)) OR ((child* OR infan* OR paediatr* OR pediatr*) adj1 epilep*)                                                                                                                                                                                           |
| 2   | Epilepsy/<br>0-3 Age Group           | (baby OR babies OR infan* OR neonat* OR newborn* OR nicu OR paediatric* OR pediatric* OR preschool OR toddler* OR "very young" OR ("younger than" OR under OR below) adj3 ("3" OR three)) OR ("3" OR three) adj3 ("or below" OR "or under" OR "or younger")) AND (epilepsy/ OR epileptic seizures/ OR epileps* OR epileptic*)                                                                         |
| 3   | Infantile Spasm/<br>Neonatal Seizure | ((babies OR baby OR infan* OR neonat* OR newborn* OR nicu) adj3 (convuls* OR seizure* OR spasm*))                                                                                                                                                                                                                                                                                                     |
| 4   | Parental Preferences                 | parents/ OR (patern* OR parent* OR matern* OR mother* OR father*)                                                                                                                                                                                                                                                                                                                                     |
| 5   | Harms                                | behavior disorders/ OR cognitive impairment/ OR delayed development/ OR developmental disabilities/ OR liver disorders/ OR motor development/ OR "side effects (drug)"/ OR "side effects (treatment)"/ OR sleep wake disorders/ OR sweating/ OR (advers* OR anhidrosis OR dystoni* OR harm* OR harm* OR hypohidrosis OR hypohydrosis OR "organ damage") OR (appetite adj3 (lose* OR losing OR loss OR |

1  
2  
3  
4  
5  
6  
7  
8  
9  
10  
11  
12  
13  
14  
15  
16  
17  
18  
19  
20  
21  
22  
23  
24  
25  
26  
27  
28  
29  
30  
31  
32  
33  
34  
35  
36  
37  
38  
39  
40  
41  
42  
43  
44  
45  
46  
47

|    |                           |                                                                                                                                                                                                                                                                                                                                                                                                                         |
|----|---------------------------|-------------------------------------------------------------------------------------------------------------------------------------------------------------------------------------------------------------------------------------------------------------------------------------------------------------------------------------------------------------------------------------------------------------------------|
|    |                           | lost)) OR ((cognitiv* OR behavior* OR develop* OR motor OR movement OR neurodevelop*) adj3 (effect* OR deficit* OR disorder* OR problem* OR symptom*)) OR ((cognitiv* OR develop* OR motor* OR neurodevelopment*) adj3 (delay* OR disorder* OR regress*)) OR ((liver OR organ*) adj3 (damag* OR injur*)) OR (miss* adj3 milestone*) OR ((eat* OR perspir* OR sweat* OR sleep*) adj3 (disorder* OR inability OR unable)) |
| 6  | Untreated Disease         | treatment refusal/ OR ("not treated" OR "no treatment" OR untreat*) OR ((declin* OR forgo* OR "not" OR no OR refus* OR withheld OR withhold*) adj3 (treated OR treatment*))                                                                                                                                                                                                                                             |
| 7  | Combine Sets              | (1 OR 2 OR 3) AND 4                                                                                                                                                                                                                                                                                                                                                                                                     |
| 8  | Apply Limits              | limit 7 to yr="1999 - 2021"                                                                                                                                                                                                                                                                                                                                                                                             |
| 9  | Apply Limits              | limit 8 to up=19000101-20210819                                                                                                                                                                                                                                                                                                                                                                                         |
| 10 | Apply Limits              | 9 NOT (1* or 2* or 3* or 4* or 5* or 6* or 7* or 8* or 9*).pm.                                                                                                                                                                                                                                                                                                                                                          |
| 11 | CQ1                       | limit 10 to english language                                                                                                                                                                                                                                                                                                                                                                                            |
| 12 | Combine Sets              | (1 OR 2 OR 3) AND (5 AND 6)                                                                                                                                                                                                                                                                                                                                                                                             |
| 13 | Apply Limits Apply Limits | Limit 12 to yr="1999 - 2021"                                                                                                                                                                                                                                                                                                                                                                                            |
| 14 | Apply Limits              | limit 13 to up=19000101-20210819                                                                                                                                                                                                                                                                                                                                                                                        |
| 15 | Apply Limits              | 14 NOT (1* or 2* or 3* or 4* or 5* or 6* or 7* or 8* or 9*).pm.                                                                                                                                                                                                                                                                                                                                                         |
| 16 | CQ2                       | limit 5 to english language                                                                                                                                                                                                                                                                                                                                                                                             |

1  
2  
3  
4  
5  
6  
7  
8  
9  
10  
11  
12  
13  
14  
15  
16  
17  
18  
19  
20  
21  
22  
23  
24  
25  
26  
27  
28  
29  
30  
31  
32  
33  
34  
35  
36  
37  
38  
39  
40  
41  
42  
43  
44  
45  
46  
47

## APPENDIX B: The Theoretical Domains Framework\*

| Domain                                       | Definition                                                                                                                                | Constructs                                                                                                                                                                                   |
|----------------------------------------------|-------------------------------------------------------------------------------------------------------------------------------------------|----------------------------------------------------------------------------------------------------------------------------------------------------------------------------------------------|
| <b>Knowledge</b>                             | An awareness of the existence of something                                                                                                | Knowledge (including knowledge of condition/scientific rationale)<br>Procedural knowledge<br>Knowledge of task environment                                                                   |
| <b>Skills</b>                                | An ability or proficiency acquired through practice                                                                                       | Skills<br>Skills development<br>Competence<br>Ability<br>Interpersonal skills<br>Practice<br>Skill assessment                                                                                |
| <b>Social/professional role and identity</b> | A coherent set of behaviors and displayed personal qualities of an individual in a social or work setting                                 | Professional identity<br>Professional role<br>Social identity<br>Identity<br>Professional boundaries<br>Professional confidence<br>Group identity<br>Leadership<br>Organizational commitment |
| <b>Beliefs about capabilities</b>            | Acceptance of the truth, reality or validity about an ability, talent or faculty that a person can put to constructive use)               | Self-confidence<br>Perceived competence<br>Self-efficacy<br>Perceived behavioral control<br>Beliefs<br>Self-esteem<br>Empowerment<br>Professional confidence                                 |
| <b>Optimism</b>                              | The confidence that things will happen for the best or that desired goals will be attained                                                | Optimism<br>Pessimism<br>Unrealistic optimism<br>Identity                                                                                                                                    |
| <b>Beliefs about Consequences</b>            | Acceptance of the truth, reality, or validity about outcomes of a behaviour in a given situation                                          | Beliefs<br>Outcome expectancies<br>Characteristics of outcome expectancies<br>Anticipated regret<br>Consequents                                                                              |
| <b>Reinforcement:</b>                        | Increasing the probability of a response by arranging a dependent relationship, or contingency, between the response and a given stimulus | Rewards (proximal/distal, valued/not valued, probable/improbable)<br>Incentives<br>Punishment<br>Consequents<br>Reinforcement<br>Contingencies<br>Sanctions                                  |

1  
2  
3  
4  
5  
6  
7  
8  
9  
10  
11  
12  
13  
14  
15  
16  
17  
18  
19  
20  
21  
22  
23  
24  
25  
26  
27  
28  
29  
30  
31  
32  
33  
34  
35  
36  
37  
38  
39  
40  
41  
42  
43  
44  
45  
46  
47

| Domain                                          | Definition                                                                                                                                                                             | Constructs                                                                                                                                                                                    |
|-------------------------------------------------|----------------------------------------------------------------------------------------------------------------------------------------------------------------------------------------|-----------------------------------------------------------------------------------------------------------------------------------------------------------------------------------------------|
| <b>Intention</b>                                | A conscious decision to perform a behaviour or a resolve to act in a certain way                                                                                                       | Stability of intentions<br>Stages of change model<br>Transtheoretical model and stages of change                                                                                              |
| <b>Goals</b>                                    | Mental representations of outcomes or end states that an individual wants to achieve                                                                                                   | Goals (distal/proximal)<br>Goal priority<br>Goal/target setting<br>Goals (autonomous/controlled)<br>Action planning<br>Implementation intention                                               |
| <b>Memory, attention and decision processes</b> | The ability to retain information, focus selectively on aspects of the environment and choose between two or more alternatives                                                         | Memory<br>Attention<br>Attention control<br>Decision-making<br>Cognitive overload/tiredness                                                                                                   |
| <b>Environmental context and resources</b>      | Any circumstance of a person's situation or environment that discourages or encourages the development of skills and abilities, independence, social competence and adaptive behaviour | Environmental stressors<br>Resources/material resources<br>Organizational culture/climate<br>Salient events/critical incidents<br>Person environment interaction<br>Barriers and facilitators |
| <b>Social influences</b>                        | Those interpersonal processes that can cause individuals to change their thoughts, feelings, or behaviours                                                                             | Social pressure<br>Social norms<br>Group conformity<br>Social comparisons<br>Group norms<br>Social support<br>Power<br>Intergroup conflict<br>Alienation<br>Group identity<br>Modelling       |
| <b>Emotion</b>                                  | A complex reaction pattern, involving experiential, behavioural, and physiological elements, by which the individual attempts to deal with a personally significant matter or event    | Fear<br>Anxiety<br>Affect<br>Stress<br>Depression<br>Positive/negative affect<br>Burn-out                                                                                                     |
| <b>Behavioral regulation</b>                    | Anything aimed at managing or changing objectively observed or measured actions                                                                                                        | Self-monitoring<br>Breaking habit<br>Action planning                                                                                                                                          |

\*British spelling of definitions is kept from original publication  
 Atkins L, Francis J, Islam R, O'Connor D, Patey A, Ivers N, Foy R, Duncan EM, Colquhoun H, Grimshaw JM, Lawton R, Michie S. A guide to using the Theoretical Domains Framework of behaviour change to investigate implementation problems. *Implement Sci.* 2017 Jun 21;12(1):77. doi: 10.1186/s13012-017-0605-9. PMID: 28637486; PMCID: PMC5480145.

### APPENDIX C. CERQual assessment components

| CERQual Components         | Definition                                                                                                                                                                                               |
|----------------------------|----------------------------------------------------------------------------------------------------------------------------------------------------------------------------------------------------------|
| Methodological limitations | The extent to which there are problems in the design or conduct of the primary studies supporting a review finding. We used our CASP assessment of each study to guide our assessment of this component. |
| Coherence                  | An assessment of how clear and cogent the fit is between the data from the primary studies and the review finding.                                                                                       |
| Relevance                  | The extent to which the body of evidence from the primary studies supporting a review finding is applicable to the context specified in the review question.                                             |
| Adequacy                   | The degree of richness and quantity of data supporting a review finding.                                                                                                                                 |

Noyes J, Booth A, Lewin S, et al. Applying GRADE-CERQual to qualitative evidence synthesis findings—paper 6: how to assess relevance of the data. *Implement Sci*. 2018 Jan 25;13(Suppl 1):4. doi: 10.1186/s13012-017-0693-6. PMID: 29384080.

1  
2  
3  
4  
5  
6  
7  
8  
9  
10  
11  
12  
13  
14  
15  
16  
17  
18  
19  
20  
21  
22  
23  
24  
25  
26  
27  
28  
29  
30  
31  
32  
33  
34  
35  
36  
37  
38  
39  
40  
41  
42  
43  
44  
45  
46  
47

**APPENDIX D. Methodological appraisal ratings using the CASP tool**

| CASP question                                                                   | Study            |                  |                   |                  |                           |
|---------------------------------------------------------------------------------|------------------|------------------|-------------------|------------------|---------------------------|
|                                                                                 | O'Brien, 2020    | Syiven, 2020     | Heath et al. 2016 | Ozanne, 2016     | Pieters, 2016; Baca, 2015 |
| Was there a clear statement of the aims of the research?                        | Yes              | Yes              | Yes               | Yes              | Yes                       |
| Was the qualitative methodology appropriate?                                    | Yes              | Yes              | Yes               | Yes              | Yes                       |
| Was the research design appropriate to address the aims of the research?        | Yes              | Yes              | Yes               | Yes              | Yes                       |
| Was the recruitment strategy appropriate to the aims of the research?           | No <sup>1</sup>  | No <sup>1</sup>  | No <sup>1</sup>   | No <sup>1</sup>  | No <sup>1</sup>           |
| Was data collected in a way that addressed the research issue                   | Yes              | Yes              | Yes               | Yes              | Yes                       |
| Was the relationship between researcher and participants adequately considered? | Can't tell       | Can't tell       | Can't tell        | Yes <sup>2</sup> | Can't tell                |
| Were ethical issues taken into consideration?                                   | Yes <sup>3</sup> | Yes <sup>3</sup> | Yes <sup>3</sup>  | Yes <sup>3</sup> | Can't tell                |
| Was there sufficient rigor?                                                     | Yes              | Yes              | Yes               | Yes              | Yes                       |
| Is there a clear statement of findings?                                         | Yes              | Yes              | Yes               | Yes              | Yes                       |
| How valuable is the research? <sup>4</sup>                                      | Yes              | Yes              | Yes               | Yes              | Yes                       |
| Overall risk to rigor                                                           | Low              | Low              | Low               | Low              | Low                       |

Abbreviations: CASP: Critical Appraisal Skills Programme

<sup>1</sup> Participants in these studies were recruited after their child underwent surgery, raising concerns about selection bias due to selecting parents who were a) referred to surgery, b) proceeded with surgery, and c) experience some level of success with surgery. Excludes parents of a child with drug-resistant surgery who were not referred to surgery, who choose not to proceed with surgery, or whose child did not achieve desired outcomes.

<sup>2</sup> Interviewers and researchers not part of care/surgery team

<sup>3</sup> Approved by university ethics committee

<sup>4</sup> "Yes" rating given when study: a) discussed contribution to existing knowledge or understanding, b) identified new areas where research is necessary, and c) discussed whether or how the findings can be transferred to other populations or considered other ways the research may be used

### APPENDIX E. Coding extracts for treatment decisions for childhood epilepsy into the Theoretical Domains Framework

| TDF domain | Author, Year, PMID      | Extracted text <sup>A</sup>                                                                                                                                                                                                                                                                                                                                                                                                                                                                                                                              | Theme                                                                                        |
|------------|-------------------------|----------------------------------------------------------------------------------------------------------------------------------------------------------------------------------------------------------------------------------------------------------------------------------------------------------------------------------------------------------------------------------------------------------------------------------------------------------------------------------------------------------------------------------------------------------|----------------------------------------------------------------------------------------------|
| Knowledge  | Baca, 2015, 25894906    | With the recognition that “something is wrong,” parents sought information from multiple sources in an attempt to understand seizures and epilepsy and become better advocates for their child.                                                                                                                                                                                                                                                                                                                                                          | Need for information about epilepsy, treatment options, and navigating the healthcare system |
| Knowledge  | Baca, 2015, 25894906    | Parents reported difficulties as they sought information about seizures, epilepsy, medications, and surgery....Parents sought information from a variety of disparate sources including physicians, the Internet, books, and family/friends.                                                                                                                                                                                                                                                                                                             | Need for information about epilepsy, treatment options, and navigating the healthcare system |
| Knowledge  | Baca, 2015, 25894906    | Through this journey, parents learned to navigate a complicated medical system filled with doctors of different specialties, multiple hospitals, insurance approvals, and numerous treatment options                                                                                                                                                                                                                                                                                                                                                     | Need for information about epilepsy, treatment options, and navigating the healthcare system |
| Knowledge  | Peters, 2016, 27521720  | Parents also had to learn about the intricacies of the healthcare system including the types of doctors that were needed to care for their children                                                                                                                                                                                                                                                                                                                                                                                                      | Need for information about epilepsy, treatment options, and navigating the healthcare system |
| Knowledge  | Heath, 2016, 27371883   | Parents perceived the information they received from professionals as inadequate to make an informed decision. They therefore sought out additional information regarding the surgical procedure and outcomes. Aiming to comprehend what surgery would entail, parents requested information in lay language and searched the internet for information and videos.                                                                                                                                                                                       | Need for information about epilepsy, treatment options, and navigating the healthcare system |
| Knowledge  | Heath, 2016, 27371883   | “I googled it until I couldn't google anymore and I think that gave me a better understanding of what was going on.”                                                                                                                                                                                                                                                                                                                                                                                                                                     | Need for information about epilepsy, treatment options, and navigating the healthcare system |
| Knowledge  | Heath, 2016, 27371883   | Finally, parents emphasized the importance of receiving adequate information regarding epilepsy surgery, including information presented in a variety of formats (e.g., booklets, photographs, videos). They also suggested that a ‘frequently asked questions’ information sheet would have been beneficial. “I know I got a little booklet about epilepsy surgery services, but it would have been nice for us to have some extra information... just some written up case studies of kids that have gone through, had the same, you know, operation.” | Need for information about epilepsy, treatment options, and navigating the healthcare system |
| Knowledge  | Heath, 2016, 27371883   | These included ...additional information provision                                                                                                                                                                                                                                                                                                                                                                                                                                                                                                       | Need for information about epilepsy, treatment options, and navigating the healthcare system |
| Knowledge  | O'Brien, 2020, 33120326 | [I]t was felt that a greater awareness of potential changes besides seizure control prior to surgery would have been helpful for children and their families in developing realistic expectations and preparing for post-surgical adjustment. They just tell you medical stuff about it, the recovery, not that it'll be different...They just tell you about having no seizures [...] They don't tell you what it's actually going to be like.                                                                                                          | Need for information about epilepsy, treatment options, and navigating the healthcare system |
| Knowledge  | Ozanne, 2016, 27176878  | Sometimes, parents received more information from other parents, than from the physician. They were disappointed if they felt that information was withheld                                                                                                                                                                                                                                                                                                                                                                                              | Need for information about epilepsy, treatment options, and navigating the healthcare system |
| Knowledge  | Ozanne, 2016, 27176878  | Parents thought that it was important to receive the information that surgery was aimed to treat the epilepsy and not other disabilities, such as behavioral problems, in order to have realistic expectations. They emphasized the importance of being informed about both positive and negative outcomes and risks. Even if surgery was a medical success, the family's life situation was                                                                                                                                                             | Need for information about epilepsy, treatment options, and navigating the healthcare system |

| TDF domain               | Author, Year, PMID      | Extracted text <sup>A</sup>                                                                                                                                                                                                                                                                                                                                                                                                                                                                                                                                                                                                                                                                            | Theme                               |
|--------------------------|-------------------------|--------------------------------------------------------------------------------------------------------------------------------------------------------------------------------------------------------------------------------------------------------------------------------------------------------------------------------------------------------------------------------------------------------------------------------------------------------------------------------------------------------------------------------------------------------------------------------------------------------------------------------------------------------------------------------------------------------|-------------------------------------|
|                          |                         | sometimes characterized by sorrow and problems. The deterioration, expected or unexpected, of e.g., motor function, speech, visual field, or attention made life more difficult and burdensome.                                                                                                                                                                                                                                                                                                                                                                                                                                                                                                        |                                     |
| Knowledge                | Baca, 2015, 25894906    | Parents also reported little initial familiarity with epilepsy and that they felt overwhelmed trying to learn a new language of epilepsy because of the “avalanche of information coming at us.”                                                                                                                                                                                                                                                                                                                                                                                                                                                                                                       | Overwhelmed by information          |
| Knowledge                | Pieters, 2016, 27521720 | She described the hard and time-consuming struggle of trying to synthesize information on her own “because there really wasn’t a lot out there and when you’re hearing different things from different specialists it’s very difficult for parents to make heads or tails of it”. She spent “six months combing through the literature reading everybody’s publications from places all over the world ... because I wasn’t getting a straight answer ... my husband was saying to me you know are you going to go and get your degree in neuroscience after this ... but you know it’s your child, you want to do the best by them and you know you want them to be able to achieve their potential”. | Overwhelmed by information          |
| Knowledge                | Baca, 2015, 25894906    | As they acquired more epilepsy knowledge, however, many parents felt more empowered and able to ask questions and participate more effectively in the care of their child                                                                                                                                                                                                                                                                                                                                                                                                                                                                                                                              | Knowledge is empowering             |
| Knowledge                | Baca, 2015, 25894906    | A mother who stated, “I just think knowledge is power and it also brings some comfort to making a good decision,” exemplified the sense of empowerment associated with gaining fluency in the language of epilepsy                                                                                                                                                                                                                                                                                                                                                                                                                                                                                     | Knowledge is empowering             |
| Knowledge                | Heath, 2016, 27371883   | Increasing their own knowledge about medically intractable epilepsy and the available treatment options empowered parents to participate more fully in the decision-making process. “I said to him ‘don’t tell me in a doctor’s term, tell it me in a parent’s term. I want to know the ins and outs; I want to know exactly what the risks are but in terms that I understand”                                                                                                                                                                                                                                                                                                                        | Knowledge is empowering             |
| Knowledge                | Pieters, 2016, 27521720 | [P]arents took on the responsibility for learning as exemplified by the parent who naturally ‘corrected’ her language to imply her understanding of the different terms that clinicians use, “(the seizures) were not controlled ... or intractable as you guys call them.”                                                                                                                                                                                                                                                                                                                                                                                                                            | Knowledge is empowering             |
| Knowledge                | Pieters, 2016, 27521720 | Being open to learn and learning itself occurred while parents became epilepsy experts in order to be effective advocates for their children                                                                                                                                                                                                                                                                                                                                                                                                                                                                                                                                                           | Knowledge is empowering             |
| Knowledge                | Pieters, 2016, 27521720 | In order to have productive information exchanges with clinicians and engage in shared decision-making, parents realized that they had to learn about a very unfamiliar and unforeseen situation                                                                                                                                                                                                                                                                                                                                                                                                                                                                                                       | Knowledge is empowering             |
| Knowledge                | Pieters, 2016, 27521720 | The lack of understandable information and the experience of information imbalance between the parent and the physician were overwhelming as experienced by a father who described him and his wife as “pretty pragmatic.” He said, “The beginning was terrible, because you’re of course dealing with ... specialists in things and that you’ve pretty much never even heard of .... It was tough in the beginning, really tough ... (the information that we found) was written by doctors for doctors. It’s kinda tough when you don’t know what you’re talking about to get through that.                                                                                                          | Knowledge is empowering             |
| Social role and identity | Heath, 2016, 27371883   | However, they also reported a sense of duty to be “strong” (P1) and “brave” (P3, 4) for their children, wishing to protect them from their feelings of anxiety.                                                                                                                                                                                                                                                                                                                                                                                                                                                                                                                                        | Role and responsibility as a parent |
| Social role and identity | Heath, 2016, 27371883   | Parents discussed feeling pressure from a need to ‘do the right thing’ by their child; that is, choosing the treatment option that would give their child the best chance of reaching their full potential                                                                                                                                                                                                                                                                                                                                                                                                                                                                                             | Role and responsibility as a parent |



| TDF domain | Author, Year, PMID      | Extracted text <sup>A</sup>                                                                                                                                                                                                                                                                                                                                                                                                                                                                                                                                                                                       | Theme                            |
|------------|-------------------------|-------------------------------------------------------------------------------------------------------------------------------------------------------------------------------------------------------------------------------------------------------------------------------------------------------------------------------------------------------------------------------------------------------------------------------------------------------------------------------------------------------------------------------------------------------------------------------------------------------------------|----------------------------------|
| Emotion    | Baca, 2015, 25894906    | Parents reported personal and family stress throughout the journey. Caring for children with a chronic, severe, and paroxysmal neurologic condition meant being "on call" all the time; they had to be prepared to respond to an emergency at all times                                                                                                                                                                                                                                                                                                                                                           | Drained from managing epilepsy   |
| Emotion    | O'Brien, 2020, 33120326 | Participant descriptions highlighted the significant impact that epilepsy had upon on the child's and family's lives prior to epilepsy surgery. Worries about seizures and the associated risks led to constant fatigue for some: "you're tired yourself before you even go out the door" (Charlie – mother). In some cases, experiences of epilepsy impacted on their lives to such a degree that parents referred to children as "not having a life" (Charlie - mother)                                                                                                                                         | Drained from managing epilepsy   |
| Emotion    | O'Brien, 2020, 33120326 | Child mood and behavioural difficulties-stress, secrecy and shame. Before surgery children's mood and behavioura difficulties were a common, causing fear and stress w hich negatively impacted upon family relationships: "If there w as something there, she w ould get it, she w ould w ant to attack you w ith it". (Jessica – mother) Many described how increased supervision led to a change in their parenting role, negatively impacting on the relationship they or their other children had w ith their child: "I w as just his carer really and didn't have a relationship w ith him" (Jack - mother) | Drained from managing epilepsy   |
| Emotion    | Baca, 2015, 25894906    | Parents frequently described that medication trials continued often w ith little to no mention of surgery. One mother told of her frustrations w ith multiple medications, "It w as, 'Let's work on all the different medical aspects or medicines before going to surgery or even talking about surgery.'"                                                                                                                                                                                                                                                                                                       | Desperate to help their child    |
| Emotion    | Pieters, 2016, 27521720 | Parents felt desperate not only to find a treatment option that w ould work, but also to persevere and actively do something that w as productive and necessary to help their child                                                                                                                                                                                                                                                                                                                                                                                                                               | Desperate to help their child    |
| Emotion    | Pieters, 2016, 27521720 | Wanted to play an active role                                                                                                                                                                                                                                                                                                                                                                                                                                                                                                                                                                                     | Desperate to help their child    |
| Emotion    | Pieters, 2016, 27521720 | [W]anted to use time constructively                                                                                                                                                                                                                                                                                                                                                                                                                                                                                                                                                                               | Desperate to help their child    |
| Emotion    | Pieters, 2016, 27521720 | Another mother remembered that she felt "desperate" to take her adolescent son to another doctor, but she needed to w ait for referrals because of insurance                                                                                                                                                                                                                                                                                                                                                                                                                                                      | Desperate to help their child    |
| Emotion    | Pieters, 2016, 27521720 | [P]arents felt frustrated and desperate to get help for their child.                                                                                                                                                                                                                                                                                                                                                                                                                                                                                                                                              | Desperate to help their child    |
| Emotion    | Heath, 2016, 27371883   | Following indication of surgery as a potential treatment, parents and families faced w hat they described as a "difficult decision" (P5) w hich w as experienced as "daunting", "frightening", "scary", and "stressful"                                                                                                                                                                                                                                                                                                                                                                                           | Difficult and stressful decision |
| Emotion    | Pieters, 2016, 27521720 | "It w as not only in terms of time, it w as mentally draining as w ell. It took a lot of time and it took a lot of concentrated thought to figure this out."                                                                                                                                                                                                                                                                                                                                                                                                                                                      | Difficult and stressful decision |
| Emotion    | Ozanne, 2016, 27176878  | Parents w ere afraid and w orried                                                                                                                                                                                                                                                                                                                                                                                                                                                                                                                                                                                 | Fear (unspecified)               |

1  
2  
3  
4  
5  
6  
7  
8  
9  
10  
11  
12  
13  
14  
15  
16  
17  
18  
19  
20  
21  
22  
23  
24  
25  
26  
27  
28  
29  
30  
31  
32  
33  
34  
35  
36  
37  
38  
39  
40  
41  
42  
43  
44  
45  
46  
47

| TDF domain | Author, Year, PMID     | Extracted text <sup>A</sup>                                                                                                                                                                                                                                                                                                                                                                                                                                                                                                                                | Theme                                      |
|------------|------------------------|------------------------------------------------------------------------------------------------------------------------------------------------------------------------------------------------------------------------------------------------------------------------------------------------------------------------------------------------------------------------------------------------------------------------------------------------------------------------------------------------------------------------------------------------------------|--------------------------------------------|
| Emotion    | Heath, 2016, 27371883  | Last treatment of choice. For most parents, surgery was a last-resort treatment option that would only be considered following the exhaustion of all other options. This perception was influenced by parental fear regarding the irreversibility of surgery, as well as by professionals who had informed them that surgery was the only remaining treatment for controlling their child's seizures                                                                                                                                                       | Fear of surgery                            |
| Emotion    | Peters, 2016, 27521720 | For the majority of parents, brain surgery was a frightening possibility as described by the mother who said, "At first I was horrified at the thought of this innocent – having her brain opened and operated on. It just seemed so barbaric." Another mother's statement reflected upon her initial feelings of fear and avoidance when she said that she and her husband, "just couldn't deal with (having our daughter go through brain surgery)                                                                                                       | Fear of surgery                            |
| Emotion    | Sylvén, 2020, 32480305 | Parents mentioned the possibility that their child would experience "a change in personality" as a result of the surgery. They did not mention particular personality characteristics but feared that the child's personality would change for the worst                                                                                                                                                                                                                                                                                                   | Fear of surgery                            |
| Emotion    | Sylvén, 2020, 32480305 | Some parents reported that they were concerned that surgery would lead to a loss of function including that language/speech would be negatively affected. This concern included a worry that the child would develop speech difficulties or that they would lose the ability to talk completely as a result of the surgery. Parents also mentioned concerns that their child would acquire motor difficulties or even be paralyzed as a result of the surgery. Parents were also worried that any loss of function would be irreversible after the surgery | Fear of surgery                            |
| Emotion    | Sylvén, 2020, 32480305 | Many parents were worried that their child's epilepsy would be "worse" after the surgery, and as a result, the operation would have been "in vain". This included a risk that seizure frequency might increase, that seizures might be longer or be of a different character, or that seizure frequency might not improve.                                                                                                                                                                                                                                 | Fear of surgery                            |
| Emotion    | Ozanne, 2016, 27176878 | It was demanding not to know if surgery would be possible, and the parents were thankful when the decision was finally made                                                                                                                                                                                                                                                                                                                                                                                                                                | Relief after decision was made             |
| Emotion    | Sylvén, 2020, 32480305 | Many parents described a general hope for improved behavior and emotional functioning for their child. Behavior encompassed a wide variety of outcomes including that the child would be "calmer" with fewer behavioral outbursts, have better attention and concentration, and "feel better"                                                                                                                                                                                                                                                              | Hope for better health and quality of life |
| Emotion    | Sylvén, 2020, 32480305 | Parents hoped that the surgery would lead to better health and quality of life for their child                                                                                                                                                                                                                                                                                                                                                                                                                                                             | Hope for better health and quality of life |
| Emotion    | Sylvén, 2020, 32480305 | Parents often expressed a desire that surgery would result in their child being "more alert", less "tired", and "have more energy". They also mentioned that they hoped that surgery would result in better sleep quality                                                                                                                                                                                                                                                                                                                                  | Hope for better health and quality of life |
| Emotion    | Sylvén, 2020, 32480305 | Some parents mentioned complete freedom from medicine while others mentioned a reduction in AEDs. Parents believed a reduction in AEDs and associated adverse side effects of AEDs including "tiredness" would lead to a "normal life" for their child                                                                                                                                                                                                                                                                                                     | Hope for better health and quality of life |
| Emotion    | Baca, 2015, 25894906   | As parents learned that surgery was a potential viable option for their child, they "hoped" for candidacy                                                                                                                                                                                                                                                                                                                                                                                                                                                  | Hope for surgical candidacy                |
| Emotion    | Heath, 2016, 27371883  | When a decision to accept surgery had been made, parents hoped for the procedure to be carried out as soon as possible. Waiting for a date for surgery was described as an anxious time for parents, who experienced relief when a date was set.                                                                                                                                                                                                                                                                                                           | Hope for surgical candidacy                |

| TDF domain        | Author, Year, PMID      | Extracted text <sup>A</sup>                                                                                                                                                                                                                                                                                                                                                                                                                                                                                                                                                                                       | Theme                                                    |
|-------------------|-------------------------|-------------------------------------------------------------------------------------------------------------------------------------------------------------------------------------------------------------------------------------------------------------------------------------------------------------------------------------------------------------------------------------------------------------------------------------------------------------------------------------------------------------------------------------------------------------------------------------------------------------------|----------------------------------------------------------|
| Social influence  | O'Brien, 2020, 33120326 | This sense of exclusion impacted on the family as a whole, with siblings being unable to attend clubs or invite friends to their house, and parents feeling that they "couldn't join in with what other families were doing" (Lucy – mother). A common theme was parental concern that siblings had less time or attention: as "the focus was on him [child with epilepsy] a lot of the time" (Andrew – mother).                                                                                                                                                                                                  | Social exclusion                                         |
| Social influence  | O'Brien, 2020, 33120326 | Difficulties appeared to be exacerbated by a perceived lack of understanding from others, which appeared to be tied to a notion of epilepsy being an invisible condition, as seizures commonly occurred behind closed doors: "At the beginning, it was just generally at home, they didn't understand, they didn't get it. (Jessica – mother). Most participants described finding it difficult to talk to others about epilepsy, with several reporting that they limited the information they shared, or withholding the diagnosis altogether. "Gosh, we didn't tell anybody. We were ashamed". (Jack – mother) | Social exclusion                                         |
| Social influence  | Heath, 2016, 27371883   | In addition, parents emphasized the importance of accessing the experience and expertise of other parents who had followed a similar treatment pathway. Such peer support was suggested to facilitate understanding of the surgical procedure from a 'parental perspective', as well as provide emotional support. "If people could freely put their experiences on either a forum or even if you get a group, you know, parents talking to other parents who have gone through the experience to get a real idea of what's happening."                                                                           | External support from peers and healthcare professionals |
| Social influences | Heath, 2016, 27371883   | These included ... peer support                                                                                                                                                                                                                                                                                                                                                                                                                                                                                                                                                                                   | External support from peers and healthcare professionals |
| Social influence  | Pieters, 2016, 27521720 | Those parents who were able to connect with other parents and families of children with epilepsy found it to be very helpful to be able to communicate with peers with seizures unresponsive to medication who were on the same journey.                                                                                                                                                                                                                                                                                                                                                                          | External support from peers and healthcare professionals |
| Social influence  | Pieters, 2016, 27521720 | [E]xchanging shared experiences with peers gave direction to decision-making because it helped with processing complex factual and emotional information                                                                                                                                                                                                                                                                                                                                                                                                                                                          | External support from peers and healthcare professionals |
| Social influence  | Pieters, 2016, 27521720 | Three key facilitators were identified as follows: (a) having a champion, (b) finding a good team of epilepsy providers, and (c) connecting with others who shared the experience of epilepsy. (Fig. 1; Table 2). Such facilitators played a key role during the times when parents especially needed support to act purposefully and move out of vulnerable periods.                                                                                                                                                                                                                                             | External support from peers and healthcare professionals |
| Social influence  | Pieters, 2016, 27521720 | However, using time constructively happened after the parents described finding a champion that advocated for them and helped them navigate their journey. It was a champion, whether a doctor, nurse, or social worker, that facilitated steady and purposeful progress over more manageable portions of the journey                                                                                                                                                                                                                                                                                             | External support from peers and healthcare professionals |
| Social influence  | Pieters, 2016, 27521720 | One mother favorably described one such champion, a nurse coordinator, "she's like wonderful for us. She's been our lifesaver." These champions helped parents get referrals and seek different treatment options or were the persons that believed them and pushed them to seek better or additional care. For one mother, her daughter's pediatrician acted as her champion. She said, "He encouraged me and gave me the confidence that if I wasn't happy with what five other pediatric neurologists were saying that it was okay to go and you know continue to seek out other opinions."                    | External support from peers and healthcare professionals |

1  
2  
3  
4  
5  
6  
7  
8  
9  
10  
11  
12  
13  
14  
15  
16  
17  
18  
19  
20  
21  
22  
23  
24  
25  
26  
27  
28  
29  
30  
31  
32  
33  
34  
35  
36  
37  
38  
39  
40  
41  
42  
43  
44  
45  
46  
47

| TDF domain                 | Author, Year, PMID     | Extracted text <sup>A</sup>                                                                                                                                                                                                                                                                                                                                                                                                                                                                                                                                                                                                                                                                                   | Theme                                                                                                   |
|----------------------------|------------------------|---------------------------------------------------------------------------------------------------------------------------------------------------------------------------------------------------------------------------------------------------------------------------------------------------------------------------------------------------------------------------------------------------------------------------------------------------------------------------------------------------------------------------------------------------------------------------------------------------------------------------------------------------------------------------------------------------------------|---------------------------------------------------------------------------------------------------------|
| Social influence           | Heath, 2016, 27371883  | Family decisions. Parents described decision-making as a family choice involving partners, siblings, grandparents, and the child (where developmentally appropriate). Discussing treatment options with family members was generally considered to be helpful. "I remember my mother-in-law was in Pakistan and I called her up and I was very teary...I felt like I had been punched in the stomach to be honest 'cause, you know, brain surgery is not something you take lightly and she said 'well if it's for his betterment and to improve his life then we will do whatever it takes'."                                                                                                                | Family decision                                                                                         |
| Social influence           | Heath, 2016, 27371883  | For some families, decision-making regarding surgery gave rise to conflicts. For example, one mother described herself as more agreeable to surgery than the child's father because, as the primary carer, she 'witnessed' the true extent of their child's seizures. In cases where the child's epilepsy was considered to impact on the whole family (e.g., where a parent could not return to work because of a need to look after the child), then, the decision was understood as a responsibility of the whole family                                                                                                                                                                                   | Family decision                                                                                         |
| Beliefs about consequences | Baca, 2015, 25894906   | On their journey, many parents transformed their view of surgery from a scary, last resort treatment to a necessary and hopeful option. One mother explained, "By the time she got it—it got so serious I was looking toward that as being an answer to our prayers rather than just something that I couldn't even think about." This transformation occurred as parents became increasingly aware of the severity of their child's epilepsy and its impact on their child's and their future life. Although surgery remained scary, epilepsy was or became scarier than surgery. As some parents feared that their child would die from epilepsy, surgery was no longer perceived as an elective treatment. | Transformation towards surgery as the treatment choice informed by experiences, emotions, and knowledge |
| Beliefs about consequences | Baca, 2015, 25894906   | Many parents initially perceived epilepsy brain surgery to be "pretty horrific" and a treatment of "last resort."                                                                                                                                                                                                                                                                                                                                                                                                                                                                                                                                                                                             | Transformation towards surgery as the treatment choice informed by experiences, emotions, and knowledge |
| Beliefs about consequences | Baca, 2015, 25894906   | After an arduous journey, parents reached the right doctor and center; epilepsy surgery, although previously seen as a last ditch option, became a viable option and a source of hope.                                                                                                                                                                                                                                                                                                                                                                                                                                                                                                                        | Transformation towards surgery as the treatment choice informed by experiences, emotions, and knowledge |
| Beliefs about consequences | Peters, 2016, 27521720 | After persevering through hard times with unsuccessful medications and interventions, they eventually decided to proceed with surgery, the option that they perceived to be the best treatment for the epilepsy.                                                                                                                                                                                                                                                                                                                                                                                                                                                                                              | Transformation towards surgery as the treatment choice informed by experiences, emotions, and knowledge |
| Beliefs about consequences | Peters, 2016, 27521720 | Because surgery was viewed as a treatment of last resort for many parents, time was required to process the initial fear, make sense of the emotional information, and consider the factual risks and benefits in order to decide on surgery as the best option for their child. Reflecting on why it took longer than six years to get to surgery for her 9-year-old daughter, a mother said, "Of course you need to take a lot of time to think about it. It's very invasive.... I did as much research as I could about it, and talked to the doctor a lot about it, and I decided that that was her best chance of having a normal life in the future."                                                   | Transformation towards surgery as the treatment choice informed by experiences, emotions, and knowledge |

| TDF domain                 | Author, Year, PMID      | Extracted text <sup>A</sup>                                                                                                                                                                                                                                                                                                                                                                                                                                                                                                                                                                                                                                                                                                                                                                                                                                                                                                                                                                                                                                                                                                                                                                                                                                                                                                                                              | Theme                                                                                                   |
|----------------------------|-------------------------|--------------------------------------------------------------------------------------------------------------------------------------------------------------------------------------------------------------------------------------------------------------------------------------------------------------------------------------------------------------------------------------------------------------------------------------------------------------------------------------------------------------------------------------------------------------------------------------------------------------------------------------------------------------------------------------------------------------------------------------------------------------------------------------------------------------------------------------------------------------------------------------------------------------------------------------------------------------------------------------------------------------------------------------------------------------------------------------------------------------------------------------------------------------------------------------------------------------------------------------------------------------------------------------------------------------------------------------------------------------------------|---------------------------------------------------------------------------------------------------------|
| Beliefs about consequences | Pieters, 2016, 27521720 | Through internal processing, parents worked through the diverse emotions and large amount of information that they were receiving and gathering to move forward and thereby develop a greater understanding of their child's illness and prognosis in order to ultimately reach the point where surgery became the treatment of choice                                                                                                                                                                                                                                                                                                                                                                                                                                                                                                                                                                                                                                                                                                                                                                                                                                                                                                                                                                                                                                   | Transformation towards surgery as the treatment choice informed by experiences, emotions, and knowledge |
| Beliefs about consequences | Heath, 2016, 27371883   | Parents were clear that putting their child forward for epilepsy surgery was the best and right decision for their child, demonstrating a high level of satisfaction with the treatment outcome. However, initial perceptions of surgery were often negative, particularly if it was not a treatment option that had previously been considered or that professionals had indicated. Many parents described attending their child's clinic appointment expecting to talk about more conventional treatments (e.g., medication or diet), leading to them feeling surprised when surgery was raised for discussion. "We went originally to talk about the ketogenic diet and then the doctor said 'oh I think surgery's your best option' which came as a bit of a shock really because no one had ever mentioned the surgery before." (P5) "It actually came as a bit of a surprise to us that option, in that it was mentioned in a review visit, that maybe the time had come to look at the option of surgery but we weren't really aware of that option at that point so it came as quite a shock to us." (P6) While some parents took comfort from the possibility of an additional treatment pathway, others felt excluded from the decision to assess their child for surgical candidacy, leading to their feeling unable to participate in an informed discussion | Transformation towards surgery as the treatment choice informed by experiences, emotions, and knowledge |
| Beliefs about consequences | Heath, 2016, 27371883   | Some parents were unconvinced about the efficacy of surgery for reducing their child's seizures. Skepticism stemmed from their experience of other pharmacological and dietary treatments which had resulted in little improvement in seizure control. In weighing up treatment options, parents also discussed the side effects of alternative treatments. For example, medications were perceived to have a range of adverse side effects, whereas ketogenic diets were viewed as negatively affecting the child's ability to live a 'normal' life. "We thought about the effects of the medication if we chose to continue on the path of finding a different medication... but then how long would that have taken us? Like how long would it work for? Then it would develop, then how long 'til we have to find something else, with all the side-effects that can happen? I didn't want to put her through that as well." (P9)                                                                                                                                                                                                                                                                                                                                                                                                                                    | Balancing potential benefits of surgery with concerns of adverse effects                                |
| Beliefs about consequences | Heath, 2016, 27371883   | Balancing potential costs and benefits. When deliberating surgery, parents balanced their perceived necessity of the treatment in terms of how epilepsy currently affected and would, in the future, affect their child's quality of life, against concerns regarding the possibility of negative outcomes. In other words, parents weighed up the potential benefits of surgery such as freedom from seizures against what they understood as the risks, including cognitive impairments. "There was no quality of life for him; we had to do what was best. We were told of the risks of the surgery and we were told that actually this would be the best thing for him... we don't regret it, but it was, it's not an easy decision to take because you're worried about the risks of things."                                                                                                                                                                                                                                                                                                                                                                                                                                                                                                                                                                       | Balancing potential benefits of surgery with concerns of adverse effects                                |
| Beliefs about consequences | Sylvén, 2020, 32480305  | Some parents mentioned that while they would like seizure freedom, any reduction in seizures would be "welcome" and a clear improvement for their child and for the family in general.                                                                                                                                                                                                                                                                                                                                                                                                                                                                                                                                                                                                                                                                                                                                                                                                                                                                                                                                                                                                                                                                                                                                                                                   | Balancing potential benefits of surgery with concerns of adverse effects                                |
| Beliefs about consequences | Sylvén, 2020, 32480305  | Some parents mentioned complete freedom from medicine while others mentioned a reduction in AEDs. Parents believed a reduction in AEDs and associated adverse side effects of AEDs including "tiredness" would lead to a "normal life" for their child.                                                                                                                                                                                                                                                                                                                                                                                                                                                                                                                                                                                                                                                                                                                                                                                                                                                                                                                                                                                                                                                                                                                  | Balancing potential benefits of surgery with concerns of adverse effects                                |

| TDF domain                 | Author, Year, PMID     | Extracted text <sup>A</sup>                                                                                                                                                                                                                                                                                                                                                                                                                                                                                                                                                          | Theme                                                                    |
|----------------------------|------------------------|--------------------------------------------------------------------------------------------------------------------------------------------------------------------------------------------------------------------------------------------------------------------------------------------------------------------------------------------------------------------------------------------------------------------------------------------------------------------------------------------------------------------------------------------------------------------------------------|--------------------------------------------------------------------------|
| Beliefs about consequences | Sylvén, 2020, 32480305 | Many parents mentioned a desire for seizure freedom for their child after surgery. They wanted their child to be free from the “trouble” of seizures and everything that follows from seizures                                                                                                                                                                                                                                                                                                                                                                                       | Balancing potential benefits of surgery with concerns of adverse effects |
| Beliefs about consequences | Sylvén, 2020, 32480305 | They wanted that their child could do everything their friends could do like “play football, cycle, and swim independently”. Some parents mentioned that they wanted their child to be able to go back to school and have a “proper social life” while some parents referenced the future hoping that the child would be better placed to get a job and driving license as a result of surgery.                                                                                                                                                                                      | Balancing potential benefits of surgery with concerns of adverse effects |
| Beliefs about consequences | Sylvén, 2020, 32480305 | Parents mentioned the possibility that their child would experience “a change in personality” as a result of the surgery. They did not mention particular personality characteristics but feared that the child's personality would change for the worst                                                                                                                                                                                                                                                                                                                             | Balancing potential benefits of surgery with concerns of adverse effects |
| Beliefs about consequences | Sylvén, 2020, 32480305 | Some parents reported that they were concerned that surgery would lead to a loss of function including that language/speech would be negatively affected. This concern included a worry that the child would develop speech difficulties or that they would lose the ability to talk completely as a result of the surgery. Parents also mentioned concerns that their child would acquire motor difficulties or even be paralyzed as a result of the surgery. Parents were also worried that any loss of function would be irreversible after the surgery                           | Balancing potential benefits of surgery with concerns of adverse effects |
| Beliefs about consequences | Sylvén, 2020, 32480305 | The majority of parents mentioned concerns about possible complications that could occur during or soon after the surgical procedure                                                                                                                                                                                                                                                                                                                                                                                                                                                 | Balancing potential benefits of surgery with concerns of adverse effects |
| Beliefs about consequences | Sylvén, 2020, 32480305 | A small number of parents said that they had no concerns before the surgery. One parent said that they were not worried as “no concerns arose in the discussions with professionals” before the surgery                                                                                                                                                                                                                                                                                                                                                                              | Balancing potential benefits of surgery with concerns of adverse effects |
| Beliefs about consequences | Sylvén, 2020, 32480305 | The results of the current study suggest that parents frequently worry about that the child would lose skills or function, or complications would arise during surgery that could result in injury.                                                                                                                                                                                                                                                                                                                                                                                  | Balancing potential benefits of surgery with concerns of adverse effects |
| Beliefs about consequences | Heath, 2016, 27371883  | For all parents in this study, the perceived need of surgery outweighed the possible risks and side effects. “We thought this is going to be no life for him... He was on this diet which meant he couldn't go out with friends; he couldn't stay at friends' houses, all the things that other kids do, he couldn't do... and then he got these fits virtually every night and we thought... you know what, there is no decision to make, we gotta do it... We knew there were risks, we talked about them with [child] and he was frightened but he said no, we gotta do it.” (P3) | Only choice left                                                         |
| Beliefs about consequences | Heath, 2016, 27371883  | Last treatment of choice. For most parents, surgery was a last-resort treatment option that would only be considered following the exhaustion of all other options...Some parents felt that they had little alternative but to accept surgical intervention in order to provide their child with the best possible chance of improving their quality of life. “We felt it was our only option really in her having a more independent future.”                                                                                                                                       | Only choice left                                                         |
| Beliefs about consequences | Heath, 2016, 27371883  | “My husband and I walked out of the appointment saying we feel like we don't have a choice... we felt like it was the only choice we could make.”                                                                                                                                                                                                                                                                                                                                                                                                                                    | Only choice left                                                         |

| TDF domain                          | Author, Year, PMID      | Extracted text <sup>A</sup>                                                                                                                                                                                                                                                                                                                                                                                                                                                                                                                                                                                            | Theme                                            |
|-------------------------------------|-------------------------|------------------------------------------------------------------------------------------------------------------------------------------------------------------------------------------------------------------------------------------------------------------------------------------------------------------------------------------------------------------------------------------------------------------------------------------------------------------------------------------------------------------------------------------------------------------------------------------------------------------------|--------------------------------------------------|
| Beliefs about consequences          | Heath, 2016, 27371883   | For one family with an adolescent child, it was considered necessary to accept surgery while the child received care from the children's hospital as they believed that the treatment would become unavailable once transitioned to adult services.                                                                                                                                                                                                                                                                                                                                                                    | Only choice left                                 |
| Beliefs about consequences          | O'Brien, 2020, 33120326 | Parents described a process of weighing up the pros and cons based on the information provided by the medical team, which led to the decision to pursue surgery. Many perceived that surgery was the only hope "a simple decision" (Alex – mother), they were "in no doubt" (Lucy – mother) and that they "had no choice" (Jessica mother) as the health and wellbeing of their child would deteriorate or become more serious if surgery was not pursued. There was also a sense of 'not knowing' outcomes if surgery was not pursued. We felt we've got to do this because where is she going to end up if we don't? | Only choice left                                 |
| Beliefs about consequences          | O'Brien, 2020, 33120326 | Decision making – is there a choice? When asked what informed the decision-making process when considering the option of surgery as a treatment for epilepsy, parents discussed how the perceived risks to their child's safety, as well as the safety of others, were key factors. Even with all the risks, it wasn't going to be much worse than having a little girl that was unconscious all the time anyway.                                                                                                                                                                                                      | Only choice left                                 |
| Beliefs about consequences          | Ozanne, 2016, 27176878  | Parents felt that epilepsy surgery was a question of life or death, of chaos or control. It was terrifying to see the child so ill. The epilepsy was uncontrolled, and drugs gave side effects. Parents felt that there was no alternative to surgery. However, it was a difficult decision since they did not know the outcome.                                                                                                                                                                                                                                                                                       | Only choice left                                 |
| Beliefs about consequences          | Ozanne, 2016, 27176878  | Information about possible complications related to surgery did not prevent the parents from wishing to proceed with the operation. They preferred to take a risk rather than live in constant fear                                                                                                                                                                                                                                                                                                                                                                                                                    | Only choice left                                 |
| Environmental context and resources | Baca, 2015, 25894906    | The journey to finding the right doctor was further complicated by parental perceptions that doctors sometimes lacked knowledge of or familiarity with epilepsy. Many parents went to numerous doctors searching for the "right" doctor, or one who had a strong epilepsy knowledge base, could effectively identify the problem, and then make a clear plan of action                                                                                                                                                                                                                                                 | Challenges with navigating the healthcare system |
| Environmental context and resources | Baca, 2015, 25894906    | Parents expressed that their children were seen, evaluated, and cared for by a variety of doctors of different specialties throughout their journey. Parents frequently described difficulty finding the "right" doctor(s). Difficulty was associated with a lack of pediatric neurologists in their local area and with different doctors having different recommendations.                                                                                                                                                                                                                                           | Challenges with navigating the healthcare system |
| Environmental context and resources | Baca, 2015, 25894906    | Parents depicted a pathway filled with multiple doctors and treatments, insurance battles, and work and life obstacles as they sought a cure for their child's seizures, becoming ever more knowledgeable about epilepsy                                                                                                                                                                                                                                                                                                                                                                                               | Challenges with navigating the healthcare system |
| Environmental context and resources | Pieters, 2016, 27521720 | Further, finding the best clinicians for the needs of their child required an understanding of the relationship between different medical (sub)-specialties and thereby represented dual and concurrent use of processing and navigating mechanisms                                                                                                                                                                                                                                                                                                                                                                    | Challenges with navigating the healthcare system |
| Environmental context and resources | Pieters, 2016, 27521720 | The second mechanism, navigating, was when the parents kept and directed their way along their journey often through uncharted territory as they steered through various aspects of the healthcare system and learned about epilepsy itself and its various treatments.                                                                                                                                                                                                                                                                                                                                                | Challenges with navigating the healthcare system |

| TDF domain                          | Author, Year, PMID      | Extracted text <sup>A</sup>                                                                                                                                                                                                                                                                                                                                                                                                                                                                                                                                                                | Theme                                            |
|-------------------------------------|-------------------------|--------------------------------------------------------------------------------------------------------------------------------------------------------------------------------------------------------------------------------------------------------------------------------------------------------------------------------------------------------------------------------------------------------------------------------------------------------------------------------------------------------------------------------------------------------------------------------------------|--------------------------------------------------|
| Environmental context and resources | Pieters, 2016, 27521720 | A mother described her disappointment with being denied by insurance despite doing all the work that was required                                                                                                                                                                                                                                                                                                                                                                                                                                                                          | Challenges with navigating the healthcare system |
| Environmental context and resources | Pieters, 2016, 27521720 | "We'd already been fighting her seizures for two and a half, approaching three years, and because we were new there and per protocol, they wanted to try these other treatments for another year."                                                                                                                                                                                                                                                                                                                                                                                         | Challenges with navigating the healthcare system |
| Environmental context and resources | Ozanne, 2016, 27176878  | The Swedish Social Insurance Agency, technical aids center, school, and municipality were criticized by the parents. Based on their experience, they felt that the bureaucracy had been problematic and had taken a great deal of time. They had to fight for their rights, despite physicians' certificates. Without specific diagnoses of comorbidities, it was even more difficult to get adequate support. They thought that it would be helpful if the authorities understood that parents only asked for help when they had reached their limit, and then, urgent help was necessary | Challenges with navigating the healthcare system |
| Environmental context and resources | Ozanne, 2016, 27176878  | Parents were disappointed if it took a long time to get a correct diagnosis                                                                                                                                                                                                                                                                                                                                                                                                                                                                                                                | Challenges with navigating the healthcare system |
| Environmental context and resources | Baca, 2015, 25894906    | Several parents experienced feeling doubted by a doctor; some were told that nothing was wrong with their child initially                                                                                                                                                                                                                                                                                                                                                                                                                                                                  | Interactions with providers (barriers)           |
| Environmental context and resources | Baca, 2015, 25894906    | As parents learned that surgery was a potential viable option for their child, they "hoped" for candidacy. This hoping required persistence and sometimes disregarding doctors who initially felt surgery was not an option. Looking back, one father voiced happiness that he listened to his parental instincts rather than the opinion of one doctor. He (doctor) said, "I don't believe that she is a surgical candidate.' As a parent, I listened and I wanted to think otherwise.... In hindsight, I'm glad I didn't listen to him."                                                 | Interactions with providers (barriers)           |
| Environmental context and resources | Baca, 2015, 25894906    | Parents also reported notable physician-based barriers including variability in perceived knowledge of epilepsy, criteria for presurgical referral and appropriateness of epilepsy surgery                                                                                                                                                                                                                                                                                                                                                                                                 | Interactions with providers (barriers)           |
| Environmental context and resources | Pieters, 2016, 27521720 | [C]rossing such an information divide was an uphill battle as stated by a mother who described feeling dismissed by doctors until she found someone who was approachable and was "gracious enough to talk to a mere mortal mother on the phone ... because a lot of docs won't, they've got lots of protective armor around them shielding off potential patients or worse yet parents."                                                                                                                                                                                                   | Interactions with providers (barriers)           |
| Environmental context and resources | Heath, 2016, 27371883   | Parents perceived a lack of control over the decision-making process through their limited involvement in initial discussions regarding surgical candidacy                                                                                                                                                                                                                                                                                                                                                                                                                                 | Interactions with providers (barriers)           |
| Environmental context and resources | Heath, 2016, 27371883   | These included earlier and softer introduction of surgery as a possible treatment option                                                                                                                                                                                                                                                                                                                                                                                                                                                                                                   | Interactions with providers (barriers)           |
| Environmental context and resources | Ozanne, 2016, 27176878  | During the long hospitalizations, some parents felt that nobody had time for them. Arrogance of some professionals made them very disappointed                                                                                                                                                                                                                                                                                                                                                                                                                                             | Interactions with providers (barriers)           |



| TDF domain                          | Author, Year, PMID      | Extracted text <sup>A</sup>                                                                                                                                                                                                                                                                                                                                                                 | Theme                                      |
|-------------------------------------|-------------------------|---------------------------------------------------------------------------------------------------------------------------------------------------------------------------------------------------------------------------------------------------------------------------------------------------------------------------------------------------------------------------------------------|--------------------------------------------|
| Environmental context and resources | Ozanne, 2016, 27176878  | If the pediatric neurologists revealed their own worries and insecurities regarding epilepsy surgery, this could have negative effects                                                                                                                                                                                                                                                      | Interactions with providers (barriers)     |
| Environmental context and resources | Ozanne, 2016, 27176878  | Parents described that support and information were inadequate before the epilepsy was recognized to be drug-resistant, especially from the local hospital. Their concerns were not taken seriously                                                                                                                                                                                         | Interactions with providers (barriers)     |
| Environmental context and resources | Ozanne, 2016, 27176878  | The support and information went from poor to strong when specialists at the university hospitals were involved                                                                                                                                                                                                                                                                             | Interactions with providers (facilitators) |
| Environmental context and resources | Ozanne, 2016, 27176878  | The pediatric neurologist's worry and sympathy for the family could also strengthen them since they felt invited and could be insecure together                                                                                                                                                                                                                                             | Interactions with providers (facilitators) |
| Environmental context and resources | Ozanne, 2016, 27176878  | Trust and safety characterized the relations to the pediatric neurologists and specialist nurses. It strengthened parents' trust to see that the pediatric neurologist fought for the child and that the parents' opinions counted in the decision process. Parents appreciated continuous contact.                                                                                         | Interactions with providers (facilitators) |
| Environmental context and resources | Pieters, 2016, 27521720 | Trust in the information that they received was greater when their child was in the hands of a team with different expertise, as exemplified by the mother who said, "They get all the doctors together to look at all the information ... that felt a lot more helpful because if we were at a different hospital and you only had the one doctor, then they would have misdiagnosed him." | Interactions with providers (facilitators) |
| Environmental context and resources | Pieters, 2016, 27521720 | When parents finally reached a comprehensive center to seek evaluation for potential pediatric epilepsy surgery, they recognized the importance of having a medical team of experts                                                                                                                                                                                                         | Interactions with providers (facilitators) |

<sup>A</sup>Study participant (first order statement) or study author (second order statement). We kept original spelling from primary study.



## PRISMA 2020 Checklist

| Section and Topic             | Item # | Checklist item                                                                                                                                                                                                                                                                                       | Location where item is reported |
|-------------------------------|--------|------------------------------------------------------------------------------------------------------------------------------------------------------------------------------------------------------------------------------------------------------------------------------------------------------|---------------------------------|
| <b>TITLE</b>                  |        |                                                                                                                                                                                                                                                                                                      |                                 |
| Title                         | 1      | Identify the report as a systematic review.                                                                                                                                                                                                                                                          | Title page                      |
| <b>ABSTRACT</b>               |        |                                                                                                                                                                                                                                                                                                      |                                 |
| Abstract                      | 2      | See the PRISMA 2020 for Abstracts checklist.                                                                                                                                                                                                                                                         |                                 |
| <b>INTRODUCTION</b>           |        |                                                                                                                                                                                                                                                                                                      |                                 |
| Rationale                     | 3      | Describe the rationale for the review in the context of existing knowledge.                                                                                                                                                                                                                          | Background, pg 3                |
| Objectives                    | 4      | Provide an explicit statement of the objective(s) or question(s) the review addresses.                                                                                                                                                                                                               | Pg 3                            |
| <b>METHODS</b>                |        |                                                                                                                                                                                                                                                                                                      |                                 |
| Eligibility criteria          | 5      | Specify the inclusion and exclusion criteria for the review and how studies were grouped for the syntheses.                                                                                                                                                                                          | Pg 3-4                          |
| Information sources           | 6      | Specify all databases, registers, websites, organisations, reference lists and other sources searched or consulted to identify studies. Specify the date when each source was last searched or consulted.                                                                                            | Pg 3, Appendix A                |
| Search strategy               | 7      | Present the full search strategies for all databases, registers and websites, including any filters and limits used.                                                                                                                                                                                 | Appendix A                      |
| Selection process             | 8      | Specify the methods used to decide whether a study met the inclusion criteria of the review, including how many reviewers screened each record and each report retrieved, whether they worked independently, and if applicable, details of automation tools used in the process.                     | Pg 4-5                          |
| Data collection process       | 9      | Specify the methods used to collect data from reports, including how many reviewers collected data from each report, whether they worked independently, any processes for obtaining or confirming data from study investigators, and if applicable, details of automation tools used in the process. | Pg 4-5                          |
| Data items                    | 10a    | List and define all outcomes for which data were sought. Specify whether all results that were compatible with each outcome domain in each study were sought (e.g. for all measures, time points, analyses), and if not, the methods used to decide which results to collect.                        | Pg 4-5                          |
|                               | 10b    | List and define all other variables for which data were sought (e.g. participant and intervention characteristics, funding sources). Describe any assumptions made about any missing or unclear information.                                                                                         | Pg 4-5                          |
| Study risk of bias assessment | 11     | Specify the methods used to assess risk of bias in the included studies, including details of the tool(s) used, how many reviewers assessed each study and whether they worked independently, and if applicable, details of automation tools used in the process.                                    | Pg 4-5                          |
| Effect measures               | 12     | Specify for each outcome the effect measure(s) (e.g. risk ratio, mean difference) used in the synthesis or presentation of results.                                                                                                                                                                  | NA                              |
| Synthesis methods             | 13a    | Describe the processes used to decide which studies were eligible for each synthesis (e.g. tabulating the study intervention characteristics and comparing against the planned groups for each synthesis (item #5)).                                                                                 | Pg 4-5, Table 1                 |
|                               | 13b    | Describe any methods required to prepare the data for presentation or synthesis, such as handling of missing summary statistics, or data conversions.                                                                                                                                                | Pg 4-5                          |
|                               | 13c    | Describe any methods used to tabulate or visually display results of individual studies and syntheses.                                                                                                                                                                                               | Pg 4-5                          |
|                               | 13d    | Describe any methods used to synthesize results and provide a rationale for the choice(s). If meta-analysis was performed, describe the model(s), method(s) to identify the presence and extent of statistical heterogeneity, and software package(s) used.                                          | Pg 4-5                          |
|                               | 13e    | Describe any methods used to explore possible causes of heterogeneity among study results (e.g. subgroup analysis, meta-regression).                                                                                                                                                                 | Pg 4-5                          |
|                               | 13f    | Describe any sensitivity analyses conducted to assess robustness of the synthesized results.                                                                                                                                                                                                         | NA                              |
| Reporting bias assessment     | 14     | Describe any methods used to assess risk of bias due to missing results in a synthesis (arising from reporting biases).                                                                                                                                                                              | Pg 4-5< Appendix D              |



## PRISMA 2020 Checklist

| Section and Topic                              | Item # | Checklist item                                                                                                                                                                                                                                                                       | Location where item is reported |
|------------------------------------------------|--------|--------------------------------------------------------------------------------------------------------------------------------------------------------------------------------------------------------------------------------------------------------------------------------------|---------------------------------|
| Certainty assessment                           | 15     | Describe any methods used to assess certainty (or confidence) in the body of evidence for an outcome.                                                                                                                                                                                | Pg. 4-5, Table 2                |
| <b>RESULTS</b>                                 |        |                                                                                                                                                                                                                                                                                      |                                 |
| Study selection                                | 16a    | Describe the results of the search and selection process, from the number of records identified in the search to the number of studies included in the review, ideally using a flow diagram.                                                                                         | Pg 5                            |
|                                                | 16b    | Cite studies that might appear to meet the inclusion criteria, but which were excluded, and explain why they were excluded.                                                                                                                                                          | Pg 5                            |
| Study characteristics                          | 17     | Cite each included study and present its characteristics.                                                                                                                                                                                                                            | Pg 5, Table 1                   |
| Risk of bias in studies                        | 18     | Present assessments of risk of bias for each included study.                                                                                                                                                                                                                         | Appendix D                      |
| Results of individual studies                  | 19     | For all outcomes, present, for each study: (a) summary statistics for each group (where appropriate) and (b) an effect estimate and its precision (e.g. confidence/credible interval), ideally using structured tables or plots.                                                     | Table 2                         |
| Results of syntheses                           | 20a    | For each synthesis, briefly summarise the characteristics and risk of bias among contributing studies.                                                                                                                                                                               | Pg 5                            |
|                                                | 20b    | Present results of all statistical syntheses conducted. If meta-analysis was done, present for each the summary estimate and its precision (e.g. confidence/credible interval) and measures of statistical heterogeneity. If comparing groups, describe the direction of the effect. | Pg 6-8                          |
|                                                | 20c    | Present results of all investigations of possible causes of heterogeneity among study results.                                                                                                                                                                                       | Pg 6-8                          |
|                                                | 20d    | Present results of all sensitivity analyses conducted to assess the robustness of the synthesized results.                                                                                                                                                                           | NA                              |
| Reporting biases                               | 21     | Present assessments of risk of bias due to missing results (arising from reporting biases) for each synthesis assessed.                                                                                                                                                              | NA                              |
| Certainty of evidence                          | 22     | Present assessments of certainty (or confidence) in the body of evidence for each outcome assessed.                                                                                                                                                                                  | Pg 6-8, Table 2                 |
| <b>DISCUSSION</b>                              |        |                                                                                                                                                                                                                                                                                      |                                 |
| Discussion                                     | 23a    | Provide a general interpretation of the results in the context of other evidence.                                                                                                                                                                                                    | Pg 9                            |
|                                                | 23b    | Discuss any limitations of the evidence included in the review.                                                                                                                                                                                                                      | Pg 10                           |
|                                                | 23c    | Discuss any limitations of the review processes used.                                                                                                                                                                                                                                | Pg 10                           |
|                                                | 23d    | Discuss implications of the results for practice, policy, and future research.                                                                                                                                                                                                       | Pg 9-10                         |
| <b>OTHER INFORMATION</b>                       |        |                                                                                                                                                                                                                                                                                      |                                 |
| Registration and protocol                      | 24a    | Provide registration information for the review, including register name and registration number, or state that the review was not registered.                                                                                                                                       | Not registered                  |
|                                                | 24b    | Indicate where the review protocol can be accessed, or state that a protocol was not prepared.                                                                                                                                                                                       | NA                              |
|                                                | 24c    | Describe and explain any amendments to information provided at registration or in the protocol.                                                                                                                                                                                      | NA                              |
| Support                                        | 25     | Describe sources of financial or non-financial support for the review, and the role of the funders or sponsors in the review.                                                                                                                                                        | Pg 11                           |
| Competing interests                            | 26     | Declare any competing interests of review authors.                                                                                                                                                                                                                                   | Pg 11                           |
| Availability of data, code and other materials | 27     | Report which of the following are publicly available and where they can be found: template data collection forms; data extracted from included studies; data used for all analyses; analytic code; any other materials used in the review.                                           | Pg 11                           |



# PRISMA 2020 Checklist

- 1
- 2
- 3
- 4
- 5
- 6
- 7
- 8
- 9
- 10
- 11
- 12
- 13
- 14
- 15
- 16
- 17
- 18
- 19
- 20
- 21
- 22
- 23
- 24
- 25
- 26
- 27
- 28
- 29
- 30
- 31
- 32
- 33
- 34
- 35
- 36
- 37
- 38
- 39
- 40
- 41
- 42
- 43
- 44
- 45
- 46
- 47

From: Page MJ, McKenzie JE, Bossuyt PM, Boutron I, Hoffmann TC, Mulrow CD, et al. The PRISMA 2020 statement: an updated guideline for reporting systematic reviews. BMJ 2021;372:n71. doi: 10.1136/bmj.n71  
 For more information, visit: <http://www.prisma-statement.org/>

For peer review only
